# Supplementary material
Source: PubMed Central journal article supplement (PMC4370345)
Supplement: NIHMS671796-supplement-supplement.pdf [file NIHMS671796-supplement-supplement.pdf]

## Supplementary Online Content

Sacks FM, Carey VJ, Anderson CAM, et al. Effects of high vs low glycemic index of dietary carbohydrate on cardiovascular disease risk factors and insulin sensitivity: the OmniCarb randomized clinical trial. *JAMA*. doi:10.1001/jama.2014.16658.

eFigure 1. Multiple imputation

eFigure 2. Oral glucose tolerance testing, glucose and insulin

eTables 1a to 1u. Daily menus for 7 days for the 4 study diets at 2000, 2500, and 3000 kcal

eTable 2. Urinary nitrogen, creatinine, sodium, and potassium

eTable 3. Outcomes

eTable 4. Apolipoproteins B, C-III and E; and lipoprotein cholesterol and triglyceride

eTable 5. Main results for constant cohort; Participants who completed all 4 diets

eTables 6-16 Results in detail in the total group and in subgroups

eTable 6: Systolic BP (Primary Outcome)

eTable 7: Diastolic BP

eTable 8: HDL cholesterol (Primary Outcome)

eTable 9: LDL cholesterol (Primary Outcome)

eTable 10: Triglycerides (Primary Outcome)

eTable 11: Total Cholesterol

eTable 12: Non-HDL Cholesterol

eTable 13: Fasting Glucose

eTable 14: Fasting Insulin

eTable 15: HOMA Index of Insulin Resistance

eTable 16: Insulin sensitivity determined from serum glucose and insulin levels during an oral glucose tolerance test (Primary Outcome)

This supplementary material has been provided by the authors to give readers additional information about their work.

eFigure 1. Differences in outcomes according to whether multiple imputation or the observed value was used.

Multiple imputation analyzes the effect on the results of the failure of some of the participants to complete all four study diets. Of 163 enrollees completing the two mandatory diets, a modest number stopped at 2 or 3 study diets. We conduct inferences on key outcomes through multiple imputation of missing responses. We will focus on SBP, TG, LDL, HDL, and insulin sensitivity computed by the index of Matsuda and deFronzo. There was no qualitative impact of multiple imputation, as shown in the following display. To simplify consideration of the issue, we consider 99% CI constructed for contrasts of three experimental diets against the high carbohydrate, high glycemic index control. Triangles are plotted with abscissae at the multiple imputation estimate, circles plotted with abscissae at the 'available pairs' estimates. Multiple imputation was performed using the mi package in R 3.1.1, with five imputations using a collection of fixed covariates to impute missing responses in the main variables. Nominally significant, borderline significant, and apparently null effects are essentially identical for the two analyses (see figure). Note that lower case "c" = low carbohydrate; upper case "C" = high carbohydrate; lower case "g" = low glycemic index; upper case "G" = high glycemic index. Imp = multiple imputation; obs = only completers included.

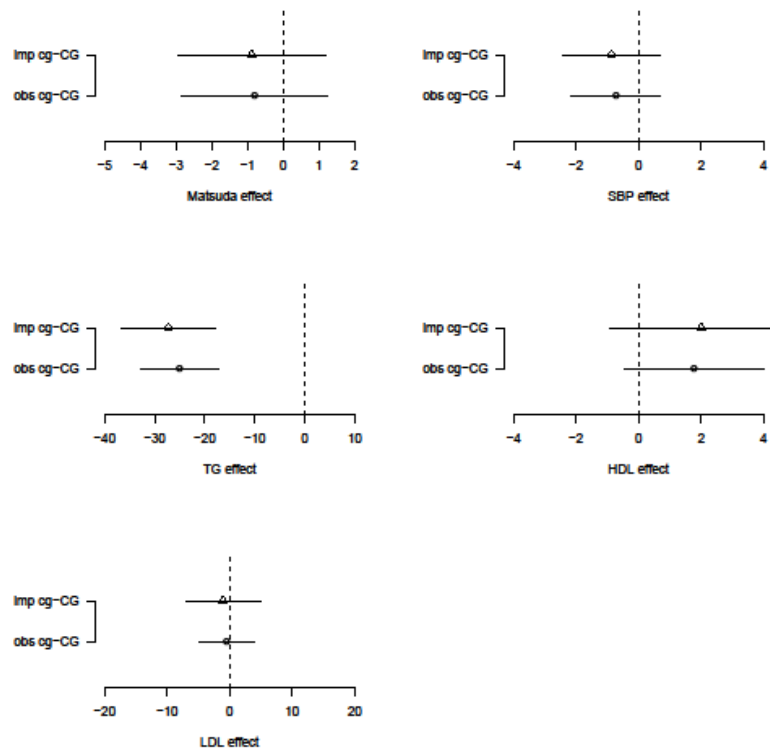

**eFigure 2. Blood glucose and insulin during oral glucose tolerance test.** In the morning after a 10-12 hour fast and at the end of each dietary period the participants drank 75 g glucose in water. Blood was sampled before the drink (time point 0), and 10, 20, 30, 60, 90, and 120 minutes later. Glucose concentration at 60 minutes was higher on the lower-carbohydrate lower-GI diet than the high-carbohydrate high GI diet by 4.9 mg/dL (P=0.046)(eTable 3). Area under the curve and diet effects for glucose and insulin are shown in eTable 3. Data points show mean, error bars show interquartile range.

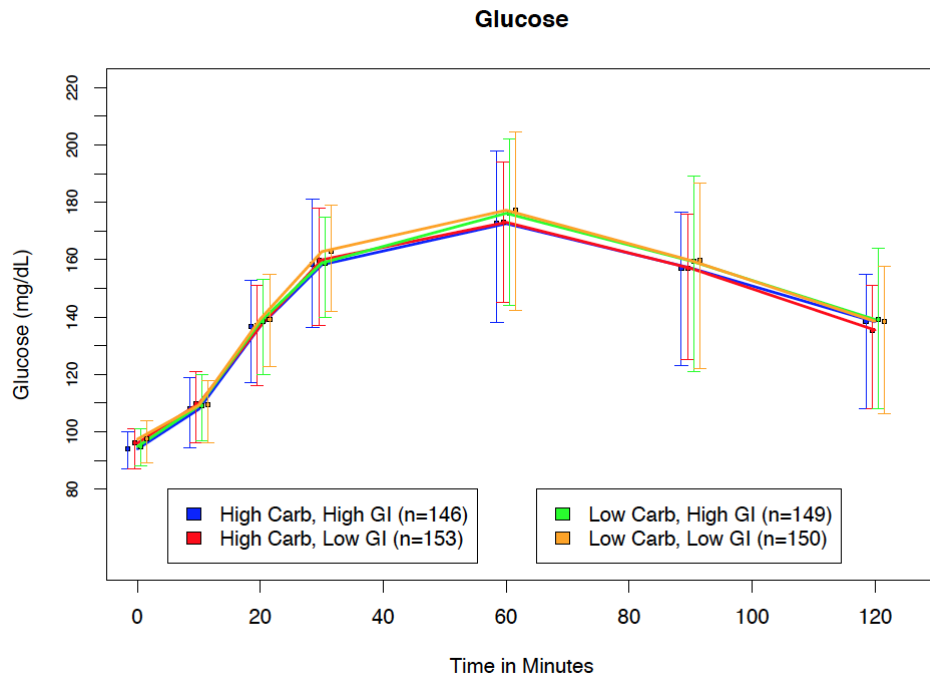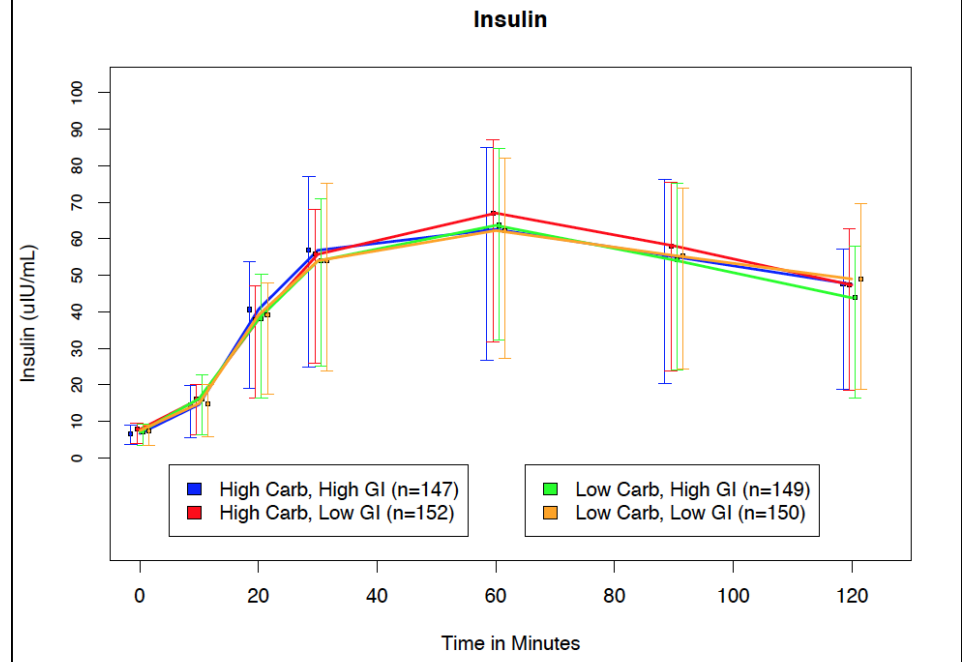

eTable 1a. Sample menus for Monday for each study diet, 2000 kcals

| Meal             | Low Carb, Low Glycemic Index |                       | Low Carb, High Glycemic Index |                          | High Carb, Low Glycemic Index |                            | High Carb, High Glycemic Index |                          |
|------------------|------------------------------|-----------------------|-------------------------------|--------------------------|-------------------------------|----------------------------|--------------------------------|--------------------------|
|                  | g                            | Food Item             | g                             | Food Item                | g                             | Food Item                  | g                              | Food Item                |
| <b>Breakfast</b> | 28                           | Kashi Go Lean         | 21                            | Cheerios                 | 28                            | Kashi Go Lean              | 34                             | Cheerios                 |
|                  |                              | Whole Grain Sourdough |                               |                          |                               |                            |                                |                          |
|                  | 26                           | Bread                 | 5                             | Wheat Bran               | 6                             | Sugar                      | 6                              | Wheat Bran               |
|                  | 244                          | Skim Milk             | 244                           | 2% Milk                  | 244                           | 2% Milk                    | 244                            | Skim Milk                |
|                  | 50                           | Ham                   | 40                            | Turkey Sausage           | 40                            | Prunes                     | 200                            | Cantaloupe               |
|                  | 100                          | Blueberries           | 75                            | Carrot and Bran Muffin   | 100                           | Blueberries                | 75                             | Carrot and Bran Muffin   |
|                  | 21                           | Slivered Almonds      | 5                             | Margarine                | 20                            | Slivered Almonds           | 10                             | Margarine                |
|                  | 10                           | Margarine             |                               |                          |                               |                            |                                |                          |
| <b>Lunch</b>     | 35                           | Whole Grain Sourdough | 56                            | White Bread              | 65                            | Whole Grain Sourdough      | 45                             | White Bread              |
|                  |                              | Bread                 |                               |                          |                               | Bread                      |                                |                          |
|                  | 150                          | Tuna Salad            | 130                           | Tuna Salad               | 70                            | Tuna Salad                 | 85                             | Tuna Salad               |
|                  | 10                           | Canola Oil            | 5                             | Canola Oil               | 60                            | Pasta Salad                | 11                             | Canola Oil               |
|                  |                              | Salad:                |                               | Salad:                   |                               | Salad:                     |                                | Salad:                   |
|                  | 45                           | Lettuce               | 60                            | Baby Spinach             | 40                            | Romaine Lettuce            | 50                             | Baby Spinach             |
|                  | 60                           | Tomatoes              | 45                            | Tomatoes                 | 45                            | Tomatoes                   | 50                             | Tomatoes                 |
|                  |                              | Canola Oil/Balsamic   |                               |                          |                               |                            |                                |                          |
|                  | 11/5                         | Vinegar               | 18                            | Olive Oil                | 10/5                          | Olive Oil/Balsamic Vinegar | 10                             | Olive Oil                |
|                  | 21                           | Cheddar Cheese, Light | 210                           | Cantaloupe               | 159                           | Orange Sections            | 143                            | Banana                   |
|                  | 20                           | Dried Apples          | 122                           | 2% Milk                  | 163                           | Tomato Juice               | 35                             | Pretzels                 |
| 30               | Dried Apricots               |                       |                               | 15                       | Margarine                     |                            |                                |                          |
| <b>Dinner</b>    | 120                          | Pork Tenderloin       | 90                            | Pork Tenderloin          | 36                            | Pork Tenderloin            | 50                             | Pork Tenderloin          |
|                  | 62                           | Bulgur Salad          | 76                            | Couscous                 | 62                            | Bulgur Salad               | 95                             | Couscous                 |
|                  | 90                           | Turnip Greens (ckd)   | 140                           | Turnip Greens (ckd)      | 75                            | Turnip Greens (ckd)        | 120                            | Turnip Greens (ckd)      |
|                  | 0.7                          | Salt                  | 13                            | Canola Oil               | 6                             | Canola Oil                 | 28                             | White Bread              |
|                  | 6                            | Sugar                 | 35                            | White Bread              | 0.8                           | Salt                       | 10                             | Margarine                |
|                  |                              | Whole Grain Sourdough |                               |                          |                               | Whole Grain Sourdough      |                                |                          |
|                  | 25                           | Bread                 | 14                            | Honey                    | 70                            | Bread                      | 122                            | 2% Milk                  |
|                  | 5                            | Margarine             | 92                            | Gelatin, sugar free      | 10                            | Margarine                  | 140                            | Apricots, in Heavy Syrup |
|                  | 21                           | Peanut Butter         |                               |                          | 120                           | Apple Juice                |                                |                          |
|                  | 138                          | Apple                 |                               |                          | 138                           | Apple                      |                                |                          |
|                  |                              |                       |                               | 240                      | Yogurt                        |                            |                                |                          |
| <b>Snack</b>     | 138                          | Apple                 | 120                           | Apricots, in Heavy Syrup | 40                            | Dried Apples               | 28                             | Raisins                  |
|                  | 25                           | Slivered Almonds      | 28                            | White Bread              | 8                             | Peanuts                    | 240                            | Cranberry Juice          |
|                  | 113                          | Cottage Cheese        | 50                            | Turkey Breast            | 113                           | Cottage Cheese             | 113                            | Cottage Cheese           |
|                  |                              |                       | 12                            | Mayonnaise               |                               |                            |                                |                          |

eTable 1b. Sample menus for Monday for each study diet, 2500 kcals

| Meal             | Low Carb, Low Glycemic Index |                            | Low Carb, High Glycemic Index |                          | High Carb, Low Glycemic Index |                            | High Carb, High Glycemic Index |                          |
|------------------|------------------------------|----------------------------|-------------------------------|--------------------------|-------------------------------|----------------------------|--------------------------------|--------------------------|
|                  | g                            | Food Item                  | g                             | Food Item                | g                             | Food Item                  | g                              | Food Item                |
| <b>Breakfast</b> | 37                           | Kashi Go Lean              | 34                            | Cheerios                 | 28                            | Kashi Go Lean              | 45                             | Cheerios                 |
|                  | 55                           | Whole Grain Sourdough      | 8                             | Wheat Bran               | 6                             | Sugar                      | 6                              | Wheat Bran               |
|                  | 244                          | Bread                      | 122                           | 2% Milk                  | 244                           | 1% Milk                    | 244                            | 1% Milk                  |
|                  | 60                           | 2% Milk                    | 50                            | Turkey Sausage           | 40                            | Prunes                     | 28                             | Raisins                  |
|                  | 20                           | Turkey Sausage             | 75                            | Carrot and Bran Muffin   | 160                           | Blueberries                | 75                             | Carrot and Bran Muffin   |
|                  | 120                          | Margarine                  | 5                             | Margarine                | 24                            | Slivered Almonds           | 5                              | Margarine                |
|                  |                              | Apple Juice                | 18                            | Slivered Almonds         | 40                            | Whole Grain Sourdough      | 10                             | Peanuts                  |
|                  |                              |                            |                               | 5                        | Bread                         |                            |                                |                          |
|                  |                              |                            |                               |                          | Margarine                     |                            |                                |                          |
| <b>Lunch</b>     | 55                           | Pumpnickel Bread           | 68                            | White Bread              | 100                           | Whole Grain Sourdough      | 72                             | White Bread              |
|                  | 190                          | Tuna Salad                 | 150                           | Tuna Salad               | 70                            | Bread                      | 100                            | Tuna Salad               |
|                  | 11                           | Canola Oil                 | 10                            | Olive Oil                | 80                            | Pasta Salad                | 9                              | Canola Oil               |
|                  |                              | Salad:                     |                               | Salad:                   | 12                            | Canola Oil                 |                                | Salad:                   |
|                  | 45                           | Baby Spinach               | 60                            | Baby Spinach             |                               | Salad:                     | 60                             | Baby Spinach             |
|                  | 50                           | Tomatoes                   | 60                            | Tomatoes                 | 40                            | Iceberg Lettuce            | 60                             | Tomatoes                 |
|                  | 13/5                         | Olive Oil/Balsamic Vinegar | 14                            | Olive Oil                | 55                            | Tomatoes                   | 11                             | Olive Oil                |
|                  | 25                           | Cheddar Cheese, Light      | 150                           | Pomegranite Juice        | 4/5                           | Olive Oil/Balsamic Vinegar | 120                            | Apricots, in Heavy Syrup |
|                  | 170                          | Apple                      | 244                           | 2% Milk                  | 100                           | Orange Sections            | 50                             | Pretzels                 |
|                  | 122                          | Skim Milk                  |                               |                          | 150                           | Strawberries               |                                |                          |
|                  |                              |                            |                               |                          | 122                           | Skim Milk                  |                                |                          |
|                  |                              |                            |                               | 5                        | Margarine                     |                            |                                |                          |
| <b>Dinner</b>    | 105                          | Pork Tenderloin            | 100                           | Pork Tenderloin          | 40                            | Pork Tenderloin            | 50                             | Pork Tenderloin          |
|                  | 77                           | Bulgur Salad               | 105                           | Couscous                 | 77                            | Bulgur Salad               | 143                            | Couscous                 |
|                  | 100                          | Turnip Greens (ckd)        | 120                           | Turnip Greens (ckd)      | 100                           | Turnip Greens (ckd)        | 125                            | Turnip Greens (ckd)      |
|                  | 0.5                          | Salt                       | 10                            | Canola Oil               | 3                             | Canola Oil                 | 40                             | White Bread              |
|                  | 7                            | Canola Oil                 | 56                            | White Bread              | 1.4                           | Salt                       | 10                             | Margarine                |
|                  |                              | Whole Grain Sourdough      |                               |                          |                               | Whole Grain Sourdough      |                                |                          |
|                  | 40                           | Bread                      | 10                            | Margarine                | 80                            | Bread                      | 122                            | 2% Milk                  |
|                  | 30                           | Peanuts                    | 60                            | Apricots, in Heavy Syrup | 10                            | Margarine                  | 170                            | Apricots, in Heavy Syrup |
|                  | 20                           | Dried Apples               |                               |                          | 32                            | Dried Apricots             |                                |                          |
|                  | 18                           | Dried Apricots             |                               |                          | 30                            | Twix® Cookie Bar, mini     |                                |                          |
|                  |                              |                            |                               | 240                      | Yogurt                        |                            |                                |                          |
| <b>Snack</b>     | 260                          | Orange Sections            | 175                           | Cantaloupe               | 138                           | Apple                      | 250                            | Cantaloupe               |
|                  | 32                           | Slivered Almonds           | 56                            | White Bread              | 21                            | Peanut Butter              | 113                            | Cottage Cheese           |
|                  | 113                          | Cottage Cheese             | 70                            | Turkey Breast            | 113                           | Cottage Cheese             | 28                             | Dried Cranberries        |
|                  |                              |                            | 12                            | Mayonnaise               | 200                           | Apple Juice                | 15                             | Slivered Almonds         |

eTable 1c. Sample menus for Monday for each study diet, 3000 kcals

|                  | Low Carb, Low Glycemic Index |                       | Low Carb, High Glycemic Index |                          | High Carb, Low Glycemic Index |                            | High Carb, High Glycemic Index |                          |
|------------------|------------------------------|-----------------------|-------------------------------|--------------------------|-------------------------------|----------------------------|--------------------------------|--------------------------|
| Meal             | g                            | Food Item             | g                             | Food Item                | g                             | Food Item                  | g                              | Food Item                |
| <b>Breakfast</b> | 42                           | Kashi Go Lean         | 35                            | Cheerios                 | 42                            | Kashi Go Lean              | 45                             | Cheerios                 |
|                  |                              | Whole Grain Sourdough |                               |                          |                               |                            |                                |                          |
|                  | 30                           | Bread                 | 8                             | Wheat Bran               | 6                             | Sugar                      | 5                              | Wheat Bran               |
|                  | 366                          | Skim Milk             | 244                           | 2% Milk                  | 244                           | 1% Milk                    | 244                            | 2% Milk                  |
|                  | 75                           | Ham                   | 80                            | Turkey Sausage           | 60                            | Prunes                     | 200                            | Cantaloupe               |
|                  | 200                          | Blueberries           | 75                            | Carrot and Bran Muffin   | 150                           | Blueberries                | 150                            | Carrot and Bran Muffin   |
|                  |                              |                       |                               |                          |                               | Whole Grain Sourdough      |                                |                          |
|                  | 31                           | Slivered Almonds      | 15                            | Margarine                | 20                            | Bread                      | 10                             | Margarine                |
| 15               | Margarine                    | 65                    | Egg Substitute                | 10                       | Margarine                     |                            |                                |                          |
|                  |                              | 5                     | Canola Oil                    | 21                       | Peanut Butter                 |                            |                                |                          |
| <b>Lunch</b>     | 225                          | Tuna Salad            | 112                           | White Bread              | 60                            | Whole Grain Sourdough      |                                |                          |
|                  | 15                           | Canola Oil            | 195                           | Tuna Salad               | 100                           | Bread                      | 68                             | White Bread              |
|                  | 35                           | Pasta Salad           | 12                            | Olive Oil                | 140                           | Tuna Salad                 | 132                            | Tuna Salad               |
|                  |                              | Salad:                |                               | Salad:                   | 0.7                           | Pasta Salad                | 16                             | Canola Oil               |
|                  | 60                           | Lettuce               | 60                            | Baby Spinach             | 12                            | Salt                       | 60                             | Salad:                   |
|                  | 60                           | Tomatoes              | 65                            | Tomatoes                 |                               | Mayonnaise                 | 60                             | Baby Spinach             |
|                  |                              | Canola Oil/Balsamic   |                               |                          |                               | Salad:                     | 60                             | Tomatoes                 |
|                  | 12/5                         | Vinegar               | 16                            | Olive Oil                | 50                            | Iceberg Lettuce            | 8                              | Olive Oil                |
|                  | 42                           | Cheddar Cheese, Light | 300                           | Cantaloupe               | 60                            | Tomatoes                   | 42                             | Raisins                  |
|                  | 200                          | Apple                 | 122                           | 2% Milk                  | 15/5                          | Olive Oil/Balsamic Vinegar | 53                             | Pretzels                 |
|                  | 120                          | Apple Juice           |                               |                          | 150                           | Orange Sections            |                                |                          |
|                  | 6                            | Sugar                 |                               |                          | 240                           | Apple Juice                |                                |                          |
| <b>Dinner</b>    | 180                          | Pork Tenderloin       | 135                           | Pork Tenderloin          | 65                            | Pork Tenderloin            | 80                             | Pork Tenderloin          |
|                  | 92                           | Bulgur Salad          | 114                           | Couscous                 | 92                            | Bulgur Salad               | 152                            | Couscous                 |
|                  | 100                          | Turnip Greens (ckd)   | 180                           | Turnip Greens (ckd)      | 80                            | Turnip Greens (ckd)        | 150                            | Turnip Greens (ckd)      |
|                  | 1.2                          | Salt                  | 20                            | Canola Oil               | 8                             | Canola Oil                 | 5                              | Olive Oil                |
|                  | 5                            | Olive Oil             | 75                            | Carrot and Bran Muffin   | 1.5                           | Salt                       | 0.8                            | Salt                     |
|                  |                              | Whole Grain Sourdough |                               |                          |                               | Whole Grain Sourdough      |                                |                          |
|                  | 49                           | Bread                 | 14                            | Honey                    | 80                            | Bread                      | 50                             | White Bread              |
|                  | 10                           | Margarine             | 92                            | Gelatin, sugar free      | 10                            | Margarine                  | 5                              | Margarine                |
|                  | 21                           | Peanut Butter         |                               |                          | 163                           | Tomato Juice               | 122                            | 2% Milk                  |
|                  | 200                          | Apple                 |                               |                          | 60                            | Dried Apples               | 210                            | Apricots, in Heavy Syrup |
|                  | 120                          | Apple Juice           |                               |                          | 360                           | Yogurt                     |                                |                          |
|                  |                              |                       |                               |                          |                               |                            |                                |                          |
| <b>Snack</b>     | 40                           | Dried Apple           | 150                           | Apricots, in Heavy Syrup | 200                           | Apple                      | 240                            | Cranberry Juice          |
|                  | 40                           | Slivered Almonds      | 42                            | White Bread              | 14                            | Slivered Almonds           | 113                            | Cottage Cheese           |
|                  | 113                          | Cottage Cheese        | 70                            | Turkey Breast            | 30                            | Twix® Cookie Bar, mini     | 215                            | Banana                   |
|                  |                              |                       | 5                             | Margarine                | 21                            | Cheddar Cheese, Light      | 10                             | Slivered Almonds         |
|                  |                              |                       | 12                            | Mayonnaise               | 122                           | 2% Milk                    |                                |                          |

eTable 1d. Sample menus for Tuesday for each study diet, 2000 kcals

|                  | Low Carb, Low Glycemic Index |                              | Low Carb, High Glycemic Index |                       | High Carb, Low Glycemic Index |                              | High Carb, High Glycemic Index |                           |
|------------------|------------------------------|------------------------------|-------------------------------|-----------------------|-------------------------------|------------------------------|--------------------------------|---------------------------|
| Meal             | g                            | Food Item                    | g                             | Food Item             | g                             | Food Item                    | g                              | Food Item                 |
| <b>Breakfast</b> | 153                          | Steel Cut Oats (ckd)         | 40                            | Instant Oatmeal (dry) | 189                           | Steel Cut Oats (ckd)         | 45                             | Instant Oatmeal (dry)     |
|                  | 244                          | Skim Milk                    | 100                           | 1% Milk               | 244                           | Skim Milk                    | 14                             | Honey                     |
|                  | 163                          | Tomato Juice                 | 200                           | Cantaloupe            | 163                           | Tomato Juice                 | 120                            | Cranberry Juice           |
|                  | 46                           | Vegetarian Sausage           | 46                            | Vegetarian Sausage    | 138                           | Apple                        | 117                            | Banana                    |
|                  | 21                           | Peanut Butter                | 75                            | Egg Substitute        | 26                            | Slivered Almonds             | 20                             | Slivered Almonds          |
|                  | 5                            | Margarine                    | 12                            | Olive Oil             |                               |                              |                                |                           |
|                  | 18                           | Whole Grain Wheat Bread      |                               |                       |                               |                              |                                |                           |
|                  |                              |                              |                               |                       |                               |                              |                                |                           |
| <b>Lunch</b>     | 40                           | Pumpernickel Bread           | 56                            | White Bread           | 40                            | Pumpernickel Bread           | 56                             | White Bread               |
|                  | 90                           | Tuna Fish                    | 105                           | Tuna Fish             | 35                            | Tuna Fish                    | 35                             | Tuna Fish                 |
|                  | 12                           | Mayonnaise                   | 12                            | Mayonnaise            | 12                            | Mayonnaise                   | 12                             | Mayonnaise                |
|                  | 40                           | Dried Apricots               | 91                            | Banana                | 55                            | Dried Apricots               | 226                            | Apricots, cnd/Heavy Syrup |
|                  | 110                          | Italian Salad, w/Beans       | 125                           | Carrot Raisin Salad   | 125                           | Italian Salad, w/Beans       | 85                             | Carrot Raisin Salad       |
|                  | 8                            | Olive Oil                    | 5                             | Canola Oil            | 150                           | 1% Milk                      | 20                             | American Cheese           |
|                  | 21                           | Cheddar Cheese, Light        |                               |                       | 25                            | Twix® Cookie Bar, mini       | 35                             | Celery                    |
|                  |                              |                              |                               |                       |                               |                              |                                |                           |
| <b>Dinner</b>    | 80                           | White Pasta Sauce            | 66                            | White Pasta Sauce     | 39                            | White Pasta Sauce            | 64                             | White Pasta Sauce         |
|                  | 67                           | Rotini Pasta (al dente, ckd) | 151                           | Instant Rice (ckd)    | 147                           | Rotini Pasta (al dente, ckd) | 126                            | Instant Rice (ckd)        |
|                  | 72                           | Diced Chicken                | 77                            | Diced Chicken         | 19                            | Diced Chicken                | 32                             | Diced Chicken             |
|                  | 11                           | Canola Oil                   | 170                           | Spinach (ckd)         | 6                             | Parmesan Cheese              | 90                             | Spinach (ckd)             |
|                  |                              | Salad:                       |                               | Salad:                |                               | Salad:                       |                                | Salad:                    |
|                  | 60                           | Baby Spinach                 | 70                            | Iceberg Lettuce       | 50                            | Romaine Lettuce              | 100                            | Tomatoes                  |
|                  | 100                          | Tomatoes                     | 100                           | Tomatoes              | 56                            | Tomatoes                     | 8                              | Olive Oil                 |
|                  | 8/5                          | Olive Oil/Red Wine Vinegar   | 50                            | Broccoli              | 5                             | Rice vinegar                 | 175                            | 2% Milk                   |
|                  | 200                          | Orange Sections              | 12                            | Olive Oil             | 14                            | Olive Oil                    | 28                             | White Bread               |
|                  |                              |                              | 12                            | Parmesan Cheese       | 40                            | Prunes                       | 262                            | Cantaloupe                |
| <b>Snack</b>     | 113                          | Cottage Cheese               | 113                           | Cottage Cheese        | 113                           | Cottage Cheese               | 113                            | Cottage Cheese            |
|                  | 22                           | Slivered Almonds             | 15                            | Slivered Almonds      | 6                             | Sunflower Seeds              | 10                             | Slivered Almonds          |
|                  | 30                           | Prunes                       | 10                            | Sunflower Seeds       | 140                           | Orange Sections              | 104                            | Banana                    |
|                  |                              |                              | 14                            | Honey                 | 50                            | Whole Grain Sourdough Bread  | 14                             | Honey                     |
|                  |                              |                              |                               |                       |                               |                              |                                |                           |



eTable 1e. Sample menus for Tuesday for each study diet, 2500 kcals

|                  | Low Carb, Low Glycemic Index |                              | Low Carb, High Glycemic Index |                       | High Carb, Low Glycemic Index |                              | High Carb, High Glycemic Index |                       |
|------------------|------------------------------|------------------------------|-------------------------------|-----------------------|-------------------------------|------------------------------|--------------------------------|-----------------------|
| Meal             | g                            | Food Item                    | g                             | Food Item             | g                             | Food Item                    | g                              | Food Item             |
| <b>Breakfast</b> | 198                          | Steel Cut Oats (ckd)         | 51                            | Instant Oatmeal (dry) | 225                           | Steel Cut Oats (ckd)         | 45                             | Instant Oatmeal (dry) |
|                  | 244                          | Skim Milk                    | 7                             | Wheat Bran            | 9                             | Olive Oil                    | 5                              | Wheat Bran            |
|                  | 163                          | Tomato Juice                 | 122                           | 2% Milk               | 120                           | 1% Milk                      | 14                             | Honey                 |
|                  | 58                           | Vegetarian Sausage           | 200                           | Cantaloupe            | 163                           | Tomato Juice                 | 175                            | Cranberry Juice       |
|                  | 21                           | Peanut Butter                | 57                            | Vegetarian Sausage    | 15                            | Dried Apricots               | 156                            | Banana                |
|                  | 5                            | Margarine                    | 94                            | Egg Substitute        | 22                            | Slivered Almonds             | 20                             | Slivered Almonds      |
|                  | 33                           | Whole Grain Wheat Bread      | 15                            | Olive Oil             | 250                           | Fruit Salad                  |                                |                       |
|                  |                              |                              |                               |                       |                               |                              |                                |                       |
| <b>Lunch</b>     | 40                           | Pumpernickel Bread           | 56                            | White Bread           | 40                            | Pumpernickel Bread           | 56                             | White Bread           |
|                  | 110                          | Tuna Fish                    | 132                           | Tuna Fish             | 68                            | Tuna Fish                    | 58                             | Tuna Fish             |
|                  | 12                           | Mayonnaise                   | 12                            | Mayonnaise            | 12                            | Mayonnaise                   | 12                             | Mayonnaise            |
|                  | 60                           | Dried Apricots               | 111                           | Banana                | 0.6                           | Salt                         | 295                            | Cantaloupe            |
|                  | 150                          | Italian Salad, w/Beans       | 157                           | Carrot Raisin Salad   | 70                            | Dried Apricots               | 125                            | Carrot Raisin Salad   |
|                  | 10                           | Olive Oil                    | 7                             | Canola Oil            | 105                           | Italian Salad, w/Beans       | 21                             | Cheddar Cheese, Light |
|                  | 42                           | Cheddar Cheese, Light        |                               |                       | 21                            | Cheddar Cheese, Light        | 40                             | Celery                |
|                  |                              |                              |                               |                       | 40                            | Twix® Cookie Bar, mini       | 200                            | 1% Milk               |
|                  |                              |                              |                               |                       |                               | 16                           | Peppermints                    |                       |
| <b>Dinner</b>    | 132                          | White Pasta Sauce            | 114                           | White Pasta Sauce     | 88                            | White Pasta Sauce            | 116                            | White Pasta Sauce     |
|                  | 105                          | Rotini Pasta (al dente, ckd) | 198                           | Instant Rice (ckd)    | 195                           | Rotini Pasta (al dente, ckd) | 137                            | Instant Rice (ckd)    |
|                  | 50                           | Diced Chicken                | 56                            | Diced Chicken         | 1                             | Salt                         | 5                              | Wheat Bran            |
|                  | 14                           | Canola Oil                   | 200                           | Spinach (ckd)         | 244                           | Skim Milk                    | 1.9                            | Salt                  |
|                  | 0.3                          | Salt                         |                               | Salad:                |                               | Salad:                       |                                | Salad:                |
|                  | 60                           | Romaine Lettuce              | 62                            | Iceberg Lettuce       | 40                            | Romaine Lettuce              | 125                            | Tomatoes              |
|                  | 125                          | Tomatoes                     | 125                           | Tomatoes              | 50                            | Tomatoes                     | 65                             | Romaine Lettuce       |
|                  | 10/5                         | Olive Oil/Red Wine Vinegar   | 68                            | Broccoli              | 5                             | Rice vinegar                 | 10                             | Olive Oil             |
|                  | 180                          | Orange Sections              | 16                            | Olive Oil             | 18                            | Olive Oil                    | 6                              | Parmesan Cheese       |
|                  |                              |                              | 12                            | Parmesan Cheese       | 138                           | Apple                        | 56                             | White Bread           |
|                  |                              |                              |                               |                       |                               | 226                          | Apricots, in Heavy Syrup       |                       |
| <b>Snack</b>     | 113                          | Cottage Cheese               | 113                           | Cottage Cheese        | 113                           | Cottage Cheese               | 113                            | Cottage Cheese        |
|                  | 30                           | Slivered Almonds             | 22                            | Slivered Almonds      | 50                            | Prunes                       | 18                             | Slivered Almonds      |
|                  | 50                           | Prunes                       | 13                            | Sunflower Seeds       | 90                            | Orange Sections              | 240                            | Orange Juice          |
|                  |                              |                              | 14                            | Honey                 | 50                            | Whole Grain Sourdough Bread  | 14                             | Honey                 |
|                  |                              |                              | 28                            | White Bread           |                               |                              |                                |                       |

eTable 1f. Sample menus for Tuesday for each study diet, 3000 kcals

|                  | Low Carb, Low Glycemic Index |                              | Low Carb, High Glycemic Index |                       | High Carb, Low Glycemic Index |                              | High Carb, High Glycemic Index |                       |
|------------------|------------------------------|------------------------------|-------------------------------|-----------------------|-------------------------------|------------------------------|--------------------------------|-----------------------|
| Meal             | g                            | Food Item                    | g                             | Food Item             | g                             | Food Item                    | g                              | Food Item             |
| <b>Breakfast</b> | 225                          | Steel Cut Oats (ckd)         | 30                            | Instant Oatmeal (dry) | 270                           | Steel Cut Oats (ckd)         | 56                             | Instant Oatmeal (dry) |
|                  | 244                          | Skim Milk                    | 5                             | Wheat Bran            | 244                           | 2% Milk                      | 6                              | Wheat Bran            |
|                  | 163                          | Tomato Juice                 | 244                           | 1% Milk               | 40                            | Pumpnickel Bread             | 12                             | Safflower Oil         |
|                  | 67                           | Vegetarian Sausage           | 14                            | Honey                 | 15                            | Margarine                    | 14                             | Honey                 |
|                  | 33                           | Peanut Butter                | 69                            | Vegetarian Sausage    | 40                            | Dried Apricots               | 240                            | Cranberry Juice       |
|                  | 10                           | Margarine                    | 15                            | Margarine             | 15                            | Slivered Almonds             | 104                            | Banana                |
|                  | 33                           | Whole Grain Wheat Bread      | 115                           | Egg Substitute        | 150                           | Grapefruit Sections          | 26                             | Slivered Almonds      |
|                  |                              |                              | 12                            | Olive Oil             |                               |                              | 60                             | 2% Milk               |
| <b>Lunch</b>     | 50                           | Whole Grain Sourdough Bread  | 65                            | White Bread           | 50                            | Whole Grain Sourdough Bread  | 80                             | White Bread           |
|                  | 120                          | Tuna Fish                    | 100                           | Tuna Fish             | 112                           | Tuna Fish                    | 70                             | Tuna Fish             |
|                  | 20                           | Mayonnaise                   | 12                            | Mayonnaise            | 12                            | Mayonnaise                   | 12                             | Mayonnaise            |
|                  | 45                           | Dried Apricots               | 117                           | Banana                | 138                           | Apple                        | 1                              | Salt                  |
|                  | 25                           | Dried Apples                 | 185                           | Carrot Raisin Salad   | 115                           | Italian Salad, w/Beans       | 150                            | Carrot Raisin Salad   |
|                  | 135                          | Italian Salad, w/Beans       | 15                            | Canola Oil            | 180                           | Orange Sections              |                                | Salad:                |
|                  | 11                           | Olive Oil                    | 21                            | Cheddar Cheese, Light | 56                            | Twix® Cookie Bar, mini       | 39                             | Romaine Lettuce       |
|                  | 42                           | Cheddar Cheese, Light        | 40                            | Celery Sticks         |                               |                              | 75                             | Tomatoes              |
| <b>Dinner</b>    | 148                          | White Pasta Sauce            | 112                           | White Pasta Sauce     | 88                            | White Pasta Sauce            | 120                            | White Pasta Sauce     |
|                  | 143                          | Rotini Pasta (al dente, ckd) | 216                           | Instant Rice (ckd)    | 189                           | Rotini Pasta (al dente, ckd) | 216                            | Instant Rice (ckd)    |
|                  | 100                          | Diced Chicken                | 110                           | Diced Chicken         | 1.6                           | Salt                         | 7                              | Wheat Bran            |
|                  | 7                            | Canola Oil                   | 90                            | Spinach (ckd)         | 140                           | Skim Milk                    | 1.6                            | Salt                  |
|                  | 0.8                          | Salt                         | 0.5                           | Salt                  |                               | Salad:                       |                                | Salad:                |
|                  | 50                           | Baby Spinach                 | 90                            | Iceberg Lettuce       | 65                            | Romaine Lettuce              | 75                             | Tomatoes              |
|                  | 70                           | Tomatoes                     | 90                            | Tomatoes              | 80                            | Tomatoes                     | 39                             | Romaine Lettuce       |
|                  | 15/5                         | Olive Oil/Red Wine Vinegar   | 95                            | Broccoli              | 5                             | Rice vinegar                 | 50                             | Broccoli (raw)        |
|                  | 275                          | Fruit Salad                  | 8                             | Olive Oil             | 20                            | Olive Oil                    | 5.5                            | Olive Oil             |
|                  |                              |                              | 6                             | Parmesan Cheese       | 45                            | Dried Apples                 | 20                             | Water Crackers        |
|                  |                              |                              | 25                            | Sunflower Seeds       | 170                           | Yogurt                       | 38                             | White Bread           |
|                  |                              |                              | 120                           | Cranberry Juice       |                               |                              | 240                            | Orange Juice          |

**eTable 1f continued. Sample menus for Tuesday for each study diet, 3000 kcals**

|              |     |                  |     |                  |           |                             |     |                          |
|--------------|-----|------------------|-----|------------------|-----------|-----------------------------|-----|--------------------------|
| <b>Snack</b> | 113 | Cottage Cheese   | 113 | Cottage Cheese   | 113       | Cottage Cheese              | 113 | Cottage Cheese           |
|              | 34  | Slivered Almonds | 35  | Slivered Almonds | 15        | Sunflower Seeds             | 27  | Slivered Almonds         |
|              | 40  | Prunes           | 300 | Cantaloupe       | 40        | Prunes                      | 226 | Apricots, in Heavy Syrup |
|              | 122 | 2% Milk          | 14  | Honey            | 40        | Whole Grain Sourdough Bread | 14  | Honey                    |
|              |     |                  |     | 244              | Skim Milk |                             |     |                          |

eTable 1g. Sample menus for Wednesday for each study diet, 2000 kcals

| Meal             | Low Carb, Low Glycemic Index |                             | Low Carb, High Glycemic Index |                       | High Carb, Low Glycemic Index |                             | High Carb, High Glycemic Index |                          |
|------------------|------------------------------|-----------------------------|-------------------------------|-----------------------|-------------------------------|-----------------------------|--------------------------------|--------------------------|
|                  | g                            | Food Item                   | g                             | Food Item             | g                             | Food Item                   | g                              | Food Item                |
| <b>Breakfast</b> | 32                           | Quinoa Cereal               | 120                           | Orange Juice          | 61                            | Quinoa Cereal               | 56                             | Instant Oatmeal (dry)    |
|                  | 18                           | Dried Apples                | 125                           | Egg Substitute        | 22                            | Dried Apples                | 3                              | Wheat Bran               |
|                  | 244                          | 1% Milk                     | 122                           | 2% Milk               | 244                           | 1% Milk                     | 244                            | 1% Milk                  |
|                  | 21                           | Peanut Butter               | 15                            | Margarine             | 21                            | Peanut Butter               | 10                             | Margarine                |
|                  | 25                           | Whole Grain Sourdough Bread | 56                            | White Bread           | 50                            | Whole Grain Sourdough Bread | 56                             | White Bread              |
|                  | 125                          | Egg Substitute              | 45                            | Ham                   |                               |                             |                                |                          |
|                  | 10                           | Margarine                   |                               |                       |                               |                             |                                |                          |
| <b>Lunch</b>     | 42                           | Pumpernickel Bread          | 32                            | White Bread           | 60                            | Whole Grain Sourdough Bread | 56                             | White Bread              |
|                  | 130                          | Chicken Salad               | 130                           | Chicken Salad         | 50                            | Chicken Salad               | 58                             | Chicken Salad            |
|                  | 10                           | Canola Oil                  | 10                            | Canola Oil            | 1.2                           | Salt                        | 9                              | Canola Oil               |
|                  | 0.5                          | Salt                        | 28                            | Raisins               | 138                           | Apple                       | 38                             | Raisins                  |
|                  | 50                           | Dried Apricots              | 20                            | Pretzels              | 50                            | Prunes                      | 120                            | Pomegranate Juice        |
|                  |                              | Salad:                      |                               | Salad:                |                               | Salad:                      |                                | Salad:                   |
|                  | 50                           | Romaine Lettuce             | 65                            | Baby Spinach          | 60                            | Romaine Lettuce             | 50                             | Baby Spinach             |
|                  | 65                           | Tomatoes                    | 50                            | Tomatoes              | 65                            | Tomatoes                    | 70                             | Tomatoes                 |
|                  | 9/5                          | Olive Oil/Balsamic Vinegar  | 12                            | Olive Oil             | 5/5                           | Olive Oil/Balsamic Vinegar  | 8                              | Olive Oil                |
|                  |                              |                             |                               | 23                    | Peanuts                       |                             |                                |                          |
| <b>Dinner</b>    | 119                          | Meatloaf                    | 94                            | Meatloaf              | 47                            | Meatloaf                    | 64                             | Meatloaf                 |
|                  | 120                          | Broccoli, (ckd)             | 150                           | Spinach (ckd)         | 160                           | Zucchini                    | 130                            | Spinach (ckd)            |
|                  | 9                            | Olive Oil                   | 95                            | Corn                  | 83                            | Barley, (ckd)               | 95                             | Corn                     |
|                  | 1                            | Salt                        | 13                            | Canola Oil            | 1.4                           | Salt                        | 8                              | Canola Oil               |
|                  |                              | Whole Grain Sourdough Bread | 35                            | White Bread           | 50                            | Whole Grain Sourdough Bread | 0.5                            | Salt                     |
|                  | 40                           | Bread                       | 15                            | Margarine             | 10                            | Margarine                   | 28                             | White Bread              |
|                  | 10                           | Margarine                   | 160                           | Watermelon            | 244                           | Skim Milk                   | 10                             | Margarine                |
|                  | 244                          | 1% Milk                     |                               |                       | 175                           | Orange Sections             | 163                            | V8 Juice                 |
|                  | 138                          | Apple                       |                               |                       | 24                            | Milk Chocolate              | 200                            | Cantaloupe               |
|                  |                              |                             |                               |                       |                               |                             | 26                             | Jelly Beans              |
| <b>Snack</b>     | 150                          | Grapefruit Sections         | 30                            | Water Crackers        | 50                            | Dried Apricots              | 25                             | Water Crackers           |
|                  | 33                           | Peanuts                     | 42                            | Cheddar Cheese, Light | 20                            | Peanuts                     | 21                             | Cheddar Cheese, Light    |
|                  | 170                          | Yogurt                      | 200                           | Cantaloupe            | 170                           | Yogurt                      | 140                            | Apricots, in Heavy Syrup |

eTable 1h. Sample menus for Wednesday for each study diet, 2500 kcals

|                  | Low Carb, Low Glycemic Index |                             | Low Carb, High Glycemic Index |                          | High Carb, Low Glycemic Index |                             | High Carb, High Glycemic Index |                          |
|------------------|------------------------------|-----------------------------|-------------------------------|--------------------------|-------------------------------|-----------------------------|--------------------------------|--------------------------|
| Meal             | g                            | Food Item                   | g                             | Food Item                | g                             | Food Item                   | g                              | Food Item                |
| <b>Breakfast</b> | 43                           | Quinoa Cereal               | 120                           | Orange Juice             | 86                            | Quinoa Cereal               | 56                             | Instant Oatmeal (dry)    |
|                  | 18                           | Dried Apples                | 115                           | Egg Substitute           | 0.5                           | Salt                        | 3                              | Wheat Bran               |
|                  | 244                          | 1% Milk                     | 244                           | 2% Milk                  | 35                            | Dried Apples                | 244                            | 1% Milk                  |
|                  | 21                           | Peanut Butter               | 20                            | Margarine                | 244                           | 1% Milk                     | 20                             | Margarine                |
|                  | 50                           | Whole Grain Sourdough Bread | 75                            | White Bread              | 28                            | Peanuts                     | 56                             | White Bread              |
|                  | 150                          | Egg Substitute              | 55                            | Ham                      | 50                            | Whole Grain Sourdough Bread | 120                            | Grape Juice              |
|                  | 20                           | Margarine                   | 5                             | Canola Oil               | 5                             | Margarine                   |                                |                          |
| <b>Lunch</b>     | 55                           | Pumpnickel Bread            | 56                            | White Bread              | 42                            | Pumpnickel Bread            | 56                             | White Bread              |
|                  | 175                          | Chicken Salad               | 155                           | Chicken Salad            | 60                            | Chicken Salad               | 65                             | Chicken Salad            |
|                  | 12                           | Canola Oil                  | 11                            | Canola Oil               | 1                             | Salt                        | 10                             | Canola Oil               |
|                  | 0.6                          | Salt                        | 24                            | Raisins                  | 5                             | Olive Oil                   | 45                             | Raisins                  |
|                  | 60                           | Dried Apricots              | 32                            | Pretzels                 | 138                           | Apple                       | 95                             | Pomegranate Juice        |
|                  |                              | Salad:                      |                               | Salad:                   | 60                            | Prunes                      |                                | Salad:                   |
|                  | 50                           | Romaine Lettuce             | 65                            | Baby Spinach             | 32                            | Peanuts                     | 60                             | Baby Spinach             |
|                  | 50                           | Tomatoes                    | 60                            | Tomatoes                 | 240                           | Apple Juice                 | 80                             | Tomatoes                 |
|                  | 11/5                         | Olive Oil/Balsamic Vinegar  | 12                            | Olive Oil                |                               |                             | 10                             | Olive Oil                |
|                  |                              |                             |                               |                          |                               | 30                          | Pretzels                       |                          |
| <b>Dinner</b>    | 153                          | Meatloaf                    | 115                           | Meatloaf                 | 60                            | Meatloaf                    | 75                             | Meatloaf                 |
|                  | 150                          | Broccoli, (ckd)             | 180                           | Spinach (ckd)            | 145                           | Broccoli, (ckd)             | 170                            | Spinach (ckd)            |
|                  | 11                           | Olive Oil                   | 105                           | Corn                     | 116                           | Barley, (ckd)               | 135                            | Corn                     |
|                  | 1.2                          | Salt                        | 9                             | Canola Oil               | 1.5                           | Salt                        | 10                             | Canola Oil               |
|                  |                              | Whole Grain Sourdough Bread | 56                            | White Bread              | 60                            | Whole Grain Sourdough Bread | 0.5                            | Salt                     |
|                  | 10                           | Margarine                   | 15                            | Margarine                | 10                            | Margarine                   | 56                             | White Bread              |
|                  | 244                          | 1% Milk                     | 75                            | Apricots, in Heavy Syrup | 244                           | Skim Milk                   | 15                             | Margarine                |
|                  | 138                          | Apple                       |                               |                          | 200                           | Orange Sections             | 163                            | V8 Juice                 |
|                  | 120                          | Apple Juice                 |                               |                          | 30                            | Milk Chocolate              | 240                            | Cantaloupe               |
|                  |                              |                             |                               |                          |                               |                             | 15                             | Jelly Beans              |
| <b>Snack</b>     | 185                          | Grapefruit Sections         | 21                            | Cheddar Cheese, Light    | 55                            | Dried Apricots              | 34                             | Water Crackers           |
|                  | 40                           | Peanuts                     | 95                            | Cantaloupe               | 28                            | Peanuts                     | 26                             | Cheddar Cheese, Light    |
|                  | 266                          | Yogurt                      | 56                            | White Bread              | 226                           | Yogurt                      | 170                            | Apricots, in Heavy Syrup |
|                  |                              |                             | 50                            | Tuna Fish                |                               |                             |                                |                          |
|                  |                              |                             | 12                            | Mayonnaise               |                               |                             |                                |                          |

eTable 1i. Sample menus for Wednesday for each study diet, 3000 kcals

|                  | Low Carb, Low Glycemic Index |                             | Low Carb, High Glycemic Index |                       | High Carb, Low Glycemic Index |                             | High Carb, High Glycemic Index |                          |
|------------------|------------------------------|-----------------------------|-------------------------------|-----------------------|-------------------------------|-----------------------------|--------------------------------|--------------------------|
| Meal             | g                            | Food Item                   | g                             | Food Item             | g                             | Food Item                   | g                              | Food Item                |
| <b>Breakfast</b> | 54                           | Quinoa Cereal               | 120                           | Cranberry Juice       | 101                           | Quinoa Cereal               | 56                             | Instant Oatmeal (dry)    |
|                  | 28                           | Dried Apples                | 125                           | Egg Substitute        | 32                            | Dried Apples                | 4                              | Wheat Bran               |
|                  | 244                          | 2% Milk                     | 244                           | 2% Milk               | 244                           | 1% Milk                     | 244                            | 1% Milk                  |
|                  | 25                           | Peanut Butter               | 20                            | Margarine             | 35                            | Peanuts                     | 20                             | Margarine                |
|                  | 60                           | Whole Grain Sourdough Bread | 75                            | White Bread           | 60                            | Whole Grain Sourdough Bread | 84                             | White Bread              |
|                  | 185                          | Egg Substitute              | 60                            | Ham                   | 5                             | Bread                       | 200                            | Grape Juice              |
|                  | 20                           | Margarine                   | 22                            | Slivered Almonds      | 177                           | Margarine                   |                                |                          |
|                  |                              |                             |                               |                       |                               | Pineapple Juice             |                                |                          |
| <b>Lunch</b>     | 60                           | Pumpernickel Bread          | 56                            | White Bread           | 42                            | Pumpernickel Bread          | 56                             | White Bread              |
|                  | 220                          | Chicken Salad               | 190                           | Chicken Salad         | 75                            | Chicken Salad               | 90                             | Chicken Salad            |
|                  | 12                           | Canola Oil                  | 12                            | Canola Oil            | 1                             | Salt                        | 12                             | Canola Oil               |
|                  | 1                            | Salt                        | 40                            | Raisins               | 3                             | Olive Oil                   | 55                             | Raisins                  |
|                  | 50                           | Dried Apricots              | 40                            | Pretzels              | 138                           | Apple                       | 140                            | Pomegranate Juice        |
|                  | 60                           | Salad:                      | 60                            | Salad:                | 60                            | Prunes                      | 65                             | Salad:                   |
|                  | 60                           | Romaine Lettuce             | 70                            | Romaine Lettuce       | 38                            | Peanuts                     | 80                             | Romaine Lettuce          |
|                  | 60                           | Tomatoes                    | 70                            | Tomatoes              | 240                           | Apple Juice                 | 80                             | Tomatoes                 |
|                  | 12/5                         | Olive Oil/Balsamic Vinegar  | 12                            | Olive Oil             | 20                            | Twix® Cookie Bar, mini      | 11                             | Olive Oil                |
|                  | 20                           | Twix Bar                    |                               |                       |                               |                             | 37                             | Pretzels                 |
| <b>Dinner</b>    | 179                          | Meatloaf                    | 153                           | Meatloaf              | 85                            | Meatloaf                    | 94                             | Meatloaf                 |
|                  | 180                          | Broccoli, (ckd)             | 200                           | Spinach (ckd)         | 240                           | Zucchini                    | 170                            | Spinach (ckd)            |
|                  | 11                           | Olive Oil                   | 140                           | Corn                  | 155                           | Barley, (ckd)               | 170                            | Corn                     |
|                  | 1.2                          | Salt                        | 12                            | Canola Oil            | 1.7                           | Salt                        | 10                             | Canola Oil               |
|                  | 60                           | Whole Grain Sourdough Bread | 56                            | White Bread           | 75                            | Whole Grain Sourdough Bread | 0.6                            | Salt                     |
|                  | 15                           | Margarine                   | 15                            | Margarine             | 10                            | Bread                       | 56                             | White Bread              |
|                  | 244                          | 1% Milk                     | 21                            | Cheddar Cheese, Light | 244                           | Margarine                   | 15                             | Margarine                |
|                  | 138                          | Apple                       |                               |                       | 230                           | Skim Milk                   | 163                            | V8 Juice                 |
|                  | 240                          | Apple Juice                 |                               |                       | 32                            | Orange Sections             | 250                            | Milk Chocolate           |
|                  |                              |                             |                               |                       |                               |                             | 30                             | Cantaloupe               |
| <b>Snack</b>     | 220                          | Grapefruit Sections         | 21                            | Cheddar Cheese, Light | 65                            | Dried Apricots              | 28                             | Water Crackers           |
|                  | 48                           | Peanuts                     | 230                           | Cantaloupe            | 35                            | Peanuts                     | 30                             | Cheddar Cheese, Light    |
|                  | 226                          | Yogurt                      | 30                            | Water Crackers        | 226                           | Yogurt                      | 200                            | Apricots, in Heavy Syrup |
|                  |                              |                             | 65                            | Tuna Fish             |                               |                             | 15                             | Slivered Almonds         |
|                  |                              |                             | 12                            | Mayonnaise            |                               |                             |                                |                          |

eTable 1j. Sample menus for Thursday for each study diet, 2000 kcals

|                  | Low Carb, Low Glycemic Index |                              | Low Carb, High Glycemic Index |                       | High Carb, Low Glycemic Index |                              | High Carb, High Glycemic Index |                          |
|------------------|------------------------------|------------------------------|-------------------------------|-----------------------|-------------------------------|------------------------------|--------------------------------|--------------------------|
| Meal             | g                            | Food Item                    | g                             | Food Item             | g                             | Food Item                    | g                              | Food Item                |
| <b>Breakfast</b> | 180                          | Steel Cut Oats (ckd)         | 35                            | Corn Flakes           | 180                           | Steel Cut Oats (ckd)         | 40                             | Corn Flakes              |
|                  | 20                           | Walnuts                      | 145                           | 1% Milk               | 16                            | Slivered Almonds             | 175                            | Skim Milk                |
|                  | 163                          | Tomato Juice                 | 42                            | Slivered Almonds      | 163                           | Tomato Juice                 | 25                             | Slivered Almonds         |
|                  | 138                          | Apple                        | 163                           | V8 Juice              | 26                            | Dried Apples                 | 163                            | V8 Juice                 |
|                  | 244                          | 2% Milk                      |                               |                       | 30                            | Pumpernickel Bread           | 117                            | Banana                   |
|                  |                              |                              |                               | 15                    | Margarine                     |                              |                                |                          |
| <b>Lunch</b>     | 50                           | Whole Grain Sourdough Bread  | 48                            | White Bread           | 50                            | Whole Grain Sourdough Bread  | 65                             | White Bread              |
|                  | 35                           | Peanut Butter                | 31                            | Peanut Butter         | 21                            | Peanut Butter                | 21                             | Peanut Butter            |
|                  | 9                            | Diet Jelly                   | 14                            | Jelly                 | 9                             | Diet Jelly                   | 14                             | Jelly                    |
|                  |                              | Salad:                       |                               | Salad:                | 130                           | Pasta Salad                  |                                | Salad:                   |
|                  | 60                           | Lettuce                      | 65                            | Baby Spinach          | 355                           | 1% Milk                      | 70                             | Baby Spinach             |
|                  | 65                           | Tomatoes                     | 70                            | Tomatoes              | 130                           | Orange Sections              | 80                             | Tomatoes                 |
|                  | 30                           | Cucumber                     | 13                            | Safflower Oil         |                               |                              | 8                              | Safflower Oil            |
|                  | 15/5                         | Olive Oil/Balsamic Vinegar   | 27                            | Cheddar Cheese, Light |                               |                              | 21                             | Cheddar Cheese, Light    |
| 25               | Dried Apples                 | 200                          | Cantaloupe                    |                       |                               | 220                          | Pomegranate Juice              |                          |
| <b>Dinner</b>    | 84                           | Rotini Pasta (al dente, ckd) | 265                           | Parmesan Rice         | 120                           | Rotini Pasta (al dente, ckd) | 270                            | Parmesan Rice            |
|                  | 158                          | Parmesan Pasta Sauce         | 126                           | Diced Chicken         | 218                           | Parmesan Pasta Sauce         | 60                             | Diced Chicken            |
|                  | 158                          | Diced Chicken                | 130                           | Broccoli, (ckd)       | 44                            | Diced Chicken                | 150                            | Broccoli, (ckd)          |
|                  | 90                           | Zucchini, (ckd)              | 170                           | Stewed Tomatoes       | 70                            | Broccoli, (ckd)              | 118                            | Apricots, in Heavy Syrup |
|                  | 20                           | Whole Grain Wheat Bread      | 11                            | Rice Krispies Treat   | 0.4                           | Salt                         | 5                              | Margarine                |
|                  | 22                           | Dried Apples                 |                               |                       | 45                            | Dried Apricots               | 110                            | Grape Juice              |
|                  |                              |                              |                               | 120                   | 2% Milk                       |                              |                                |                          |
| <b>Snack</b>     | 28                           | Slivered Almonds             | 70                            | Cranberry Juice       | 138                           | Apple                        | 69                             | Bagel                    |
|                  | 90                           | Orange Sections              | 113                           | Cottage Cheese        | 20                            | Nutella Spread               | 5                              | Margarine                |
|                  | 34                           | Cheddar Cheese, Light        | 14                            | Raisins               | 170                           | Yogurt                       | 250                            | Cantaloupe               |
|                  | 163                          | Tomato Juice                 | 15                            | Sunflower Seeds       | 163                           | Tomato Juice                 |                                |                          |
|                  |                              | 14                           | Honey                         |                       |                               |                              |                                |                          |

eTable 1k. Sample menus for Thursday for each study diet, 2500 kcals

| Meal             | Low Carb, Low Glycemic Index |                              | Low Carb, High Glycemic Index |                       | High Carb, Low Glycemic Index |                              | High Carb, High Glycemic Index |                          |
|------------------|------------------------------|------------------------------|-------------------------------|-----------------------|-------------------------------|------------------------------|--------------------------------|--------------------------|
|                  | g                            | Food Item                    | g                             | Food Item             | g                             | Food Item                    | g                              | Food Item                |
| <b>Breakfast</b> | 180                          | Steel Cut Oats (ckd)         | 45                            | Corn Flakes           | 203                           | Steel Cut Oats (ckd)         | 50                             | Corn Flakes              |
|                  | 25                           | Slivered Almonds             | 244                           | Skim Milk             | 10                            | Olive Oil                    | 220                            | Skim Milk                |
|                  | 163                          | Tomato Juice                 | 40                            | Slivered Almonds      | 15                            | Slivered Almonds             | 35                             | Slivered Almonds         |
|                  | 130                          | Fruit Salad                  | 35                            | Cheddar Cheese, Light | 163                           | Tomato Juice                 | 163                            | V8 Juice                 |
|                  | 244                          | 1% Milk                      | 163                           | V8 Juice              | 33                            | Dried Apples                 | 156                            | Banana                   |
|                  | 110                          | Egg Substitute               |                               |                       | 40                            | Pumpernickel Bread           |                                |                          |
|                  | 15                           | Margaine                     |                               |                       | 10                            | Margarine                    |                                |                          |
| <b>Lunch</b>     | 50                           | Whole Grain Sourdough Bread  | 56                            | White Bread           | 50                            | Whole Grain Sourdough Bread  | 65                             | White Bread              |
|                  | 32                           | Peanut Butter                | 40                            | Peanut Butter         | 21                            | Peanut Butter                | 36                             | Peanut Butter            |
|                  | 9                            | Diet Jelly                   | 14                            | Jelly                 | 9                             | Diet Jelly                   | 14                             | Jelly                    |
|                  | 175                          | Pasta Salad                  |                               | Salad:                | 186                           | Pasta Salad                  |                                | Salad:                   |
|                  | 32                           | Walnuts                      | 70                            | Romaine Lettuce       | 1                             | Salt                         | 65                             | Romaine Lettuce          |
|                  |                              |                              | 50                            | Tomatoes              | 244                           | 2% Milk                      | 40                             | Tomatoes                 |
|                  |                              |                              | 80                            | Cauliflower           | 60                            | Dried Apricots               | 85                             | Cauliflower (raw)        |
|                  |                              |                              | 14                            | Safflower Oil         |                               |                              | 8                              | Safflower Oil            |
|                  |                              |                              | 11                            | Rice Krispies Treat   |                               |                              | 20                             | Raisins                  |
|                  |                              |                              | 235                           | Cantaloupe            |                               |                              | 35                             | Water Crackers           |
| <b>Dinner</b>    | 132                          | Rotini Pasta (al dente, ckd) | 260                           | Parmesan Rice         | 160                           | Rotini Pasta (al dente, ckd) | 314                            | Parmesan Rice            |
|                  | 168                          | Parmesan Pasta Sauce         | 5                             | Wheat Bran            | 218                           | Parmesan Pasta Sauce         | 50                             | Diced Chicken            |
|                  | 155                          | Diced Chicken                | 176                           | Diced Chicken         | 85                            | Diced Chicken                | 130                            | Broccoli, (ckd)          |
|                  | 100                          | Zucchini, (ckd)              | 120                           | Broccoli, (ckd)       | 75                            | Broccoli, (ckd)              | 5                              | Wheat Bran               |
|                  | 11                           | Safflower Oil                | 125                           | Stewed Tomatoes       | 0.9                           | Salt                         | 110                            | Apricots, in Heavy Syrup |
|                  | 0.5                          | Salt                         | 5                             | Margarine             | 240                           | Fruit Salad                  | 5                              | Margarine                |
|                  | 22                           | Dried Apples                 | 11                            | Rice Krispies Treat   | 120                           | Apple Juice                  | 225                            | Pomegranate Juice        |
|                  |                              |                              | 26                            | Raisins               |                               |                              |                                |                          |
| <b>Snack</b>     | 18                           | Soy Nuts                     | 120                           | Cranberry Juice       | 138                           | Apple                        | 69                             | Bagel                    |
|                  | 20                           | Dried Apricots               | 113                           | Cottage Cheese        | 20                            | Nutella Spread               | 5                              | Margarine                |
|                  | 50                           | Cheddar Cheese, Light        | 36                            | Sunflower Seeds       | 226                           | Yogurt                       | 225                            | Cantaloupe               |
|                  | 28                           | Whole Grain Wheat Bread      | 14                            | Honey                 | 140                           | 2% Milk                      | 150                            | Grape Juice              |
|                  | 163                          | Tomato Juice                 |                               |                       |                               |                              |                                |                          |



eTable 11. Sample menus for Thursday for each study diet, 3000 kcals

| Meal             | Low Carb, Low Glycemic Index |                              | Low Carb, High Glycemic Index |                       | High Carb, Low Glycemic Index |                              | High Carb, High Glycemic Index |                          |
|------------------|------------------------------|------------------------------|-------------------------------|-----------------------|-------------------------------|------------------------------|--------------------------------|--------------------------|
|                  | g                            | Food Item                    | g                             | Food Item             | g                             | Food Item                    | g                              | Food Item                |
| <b>Breakfast</b> | 180                          | Steel Cut Oats (ckd)         | 58                            | Corn Flakes           | 234                           | Steel Cut Oats (ckd)         | 60                             | Corn Flakes              |
|                  | 40                           | Walnuts                      | 244                           | Skim Milk             | 12                            | Olive Oil                    | 244                            | 1% Milk                  |
|                  | 163                          | Tomato Juice                 | 50                            | Slivered Almonds      | 18                            | Slivered Almonds             | 25                             | Slivered Almonds         |
|                  | 27                           | Dried Apples                 | 60                            | Ham                   | 163                           | Tomato Juice                 | 120                            | Cranberry Juice          |
|                  | 244                          | 1% Milk                      | 120                           | Egg Substitute        | 40                            | Dried Apples                 | 176                            | Banana                   |
|                  | 135                          | Egg Substitute               | 5                             | Margarine             | 40                            | Pumpernickel Bread           | 70                             | Egg Substitute           |
|                  | 15                           | Margarine                    |                               |                       | 5                             | Margarine                    | 10                             | Margarine                |
|                  |                              |                              |                               |                       | 280                           | Skim Milk                    |                                |                          |
| <b>Lunch</b>     | 50                           | Whole Grain Sourdough Bread  | 56                            | White Bread           | 50                            | Whole Grain Sourdough Bread  | 65                             | White Bread              |
|                  | 42                           | Peanut Butter                | 42                            | Peanut Butter         | 35                            | Peanut Butter                | 30                             | Peanut Butter            |
|                  | 9                            | Diet Jelly                   | 14                            | Jelly                 | 9                             | Diet Jelly                   | 14                             | Jelly                    |
|                  | 170                          | Pasta Salad                  |                               | Salad:                | 200                           | Pasta Salad                  |                                | Salad:                   |
|                  | 0.4                          | Salt                         | 60                            | Romaine Lettuce       | 1.6                           | Salt                         | 60                             | Baby Spinach             |
|                  | 36                           | Slivered Almonds             | 110                           | Tomatoes              | 90                            | Grapefruit Sections          | 84                             | Tomatoes                 |
|                  | 138                          | Apple                        | 50                            | Cauliflower           | 55                            | Dried Apricots               | 65                             | Cauliflower (raw)        |
|                  |                              |                              | 16                            | Olive Oil             | 25                            | Twix® Cookie Bar, mini       | 10                             | Olive Oil                |
|                  |                              |                              | 210                           | Cantaloupe            |                               |                              | 42                             | Raisins                  |
|                  |                              |                              | 40                            | Cheddar Cheese, Light |                               |                              | 20                             | Water Crackers           |
|                  |                              | 190                          | Cranberry Juice               |                       |                               | 42                           | Cheddar Cheese, Light          |                          |
|                  |                              |                              |                               |                       |                               | 25                           | Angel Cake                     |                          |
| <b>Dinner</b>    | 160                          | Rotini Pasta (al dente, ckd) | 343                           | Parmesan Rice         | 225                           | Rotini Pasta (al dente, ckd) | 368                            | Parmesan Rice            |
|                  | 198                          | Parmesan Pasta Sauce         | 2                             | Wheat Bran            | 208                           | Parmesan Pasta Sauce         | 70                             | Diced Chicken            |
|                  | 185                          | Diced Chicken                | 155                           | Diced Chicken         | 110                           | Diced Chicken                | 130                            | Broccoli, (ckd)          |
|                  | 110                          | Zucchini, (ckd)              | 161                           | Broccoli, (ckd)       | 1.6                           | Salt                         | 6                              | Wheat Bran               |
|                  | 13                           | Safflower Oil                | 175                           | Stewed Tomatoes       | 265                           | Fruit Salad                  | 1.2                            | Salt                     |
|                  | 0.4                          | Salt                         | 11                            | Rice Krispies Treat   | 195                           | 2% Milk                      | 135                            | Apricots, in Heavy Syrup |
|                  | 220                          | Fruit Salad                  | 42                            | Raisins               |                               |                              | 5                              | Margarine                |
|                  |                              |                              |                               |                       |                               |                              | 220                            | Pomegranate Juice        |
|                  |                              |                              |                               |                       |                               | 28                           | White Bread                    |                          |
| <b>Snack</b>     | 20                           | Soy Nuts                     | 120                           | Orange Juice          | 138                           | Apple                        | 69                             | Bagel                    |
|                  | 25                           | Dried Apricots               | 113                           | Cottage Cheese        | 20                            | Nutella Spread               | 10                             | Margarine                |
|                  | 60                           | Cheddar Cheese, Light        | 50                            | Sunflower Seeds       | 226                           | Yogurt                       | 240                            | Cantaloupe               |
|                  | 32                           | Whole Grain Wheat Bread      | 14                            | Honey                 | 240                           | Apple Juice                  | 240                            | Grape Juice              |
|                  | 163                          | Tomato Juice                 |                               |                       |                               |                              |                                |                          |

eTable 1m. Sample menus for Friday for each study diet, 2000 kcals

|                  | Low Carb, Low Glycemic Index |                             | Low Carb, High Glycemic Index |                          | High Carb, Low Glycemic Index |                             | High Carb, High Glycemic Index |                         |
|------------------|------------------------------|-----------------------------|-------------------------------|--------------------------|-------------------------------|-----------------------------|--------------------------------|-------------------------|
| Meal             | g                            | Food Item                   | g                             | Food Item                | g                             | Food Item                   | g                              | Food Item               |
| <b>Breakfast</b> | 36                           | Whole Grain French Toast    | 55                            | Waffles                  | 40                            | Whole Grain French Toast    | 35                             | Waffles                 |
|                  | 160                          | Strawberries                | 14                            | Honey                    | 24                            | Diet Syrup                  | 28                             | Honey                   |
|                  | 5                            | Margarine                   | 12                            | Pecans                   | 5                             | Margarine                   | 10                             | Margarine               |
|                  | 18                           | Pecans                      | 23                            | Vegetarian Sausage       | 8                             | Pecans                      | 23                             | Vegetarian Sausage      |
|                  | 46                           | Vegetarian Sausage          | 120                           | Egg Substitute           | 9                             | Sugar                       | 60                             | Egg Substitute          |
|                  | 75                           | Egg Substitute              | 122                           | 2% Milk                  | 244                           | 1% Milk                     | 122                            | 2% Milk                 |
|                  | 159                          | Orange Sections             | 150                           | Cantaloupe               | 160                           | Strawberries                | 208                            | Banana                  |
|                  |                              |                             |                               |                          | 150                           | Orange Sections             |                                |                         |
| <b>Lunch</b>     | 26                           | Whole Grain Sourdough Bread | 40                            | White Bread              | 60                            | Whole Grain Sourdough Bread | 56                             | White Bread             |
|                  | 70                           | Vegetarian Burger           | 50                            | Tuna Fish                | 65                            | Vegetarian Burger           | 65                             | Pimento Cheese Filling  |
|                  | 32                           | Cheddar Cheese, light       | 12                            | Mayonnaise               | 16                            | Cheddar Cheese, light       | 35                             | Lettuce                 |
|                  | 5                            | Margarine                   |                               | Salad:                   | 10                            | Margarine                   | 180                            | Stewed Tomatoes         |
|                  | 60                           | Broccoli Salad              | 30                            | Green Peppers            | 30                            | Tomato, raw                 | 5                              | Wheat Bran              |
|                  | 10                           | Olive Oil                   | 60                            | Tomatoes                 | 110                           | Broccoli Salad              | 80                             | Broccoli Salad          |
|                  | 28                           | Dried Apricots              | 45                            | Lettuce                  | 22                            | Dried Apricots              | 7                              | Olive Oil               |
|                  | 244                          | 1% Milk                     | 10                            | Canola Oil               | 40                            | Prunes                      | 28                             | Raisins                 |
|                  |                              |                             | 50                            | Broccoli Salad           |                               |                             | 110                            | Apricot, in Heavy Syrup |
|                  |                              |                             | 14                            | Soy Nuts                 |                               |                             |                                |                         |
|                  |                              |                             | 270                           | Watermelon               |                               |                             |                                |                         |
|                  |                              |                             | 122                           | 2% Milk                  |                               |                             |                                |                         |
|                  | <b>Dinner</b>                | 170                         | Cod                           | 140                      | Cod                           | 60                          | Cod                            | 65                      |
| 19               |                              | Olive Oil                   | 10                            | Olive Oil                | 13                            | Olive Oil                   | 7                              | Olive Oil               |
| 0.5              |                              | Old Bay Seasoning           | 7                             | Wheat Bran               | 0.6                           | Old Bay Seasoning           | 3                              | Wheat Bran              |
| 75               |                              | Brown Basmati Rice          | 0.6                           | Old Bay Seasoning        | 100                           | Brown Basmati Rice          | 0.6                            | Old Bay Seasoning       |
| 148              |                              | Herbed Zucchini             | 162                           | Instant Rice (ckd)       | 150                           | Herbed Zucchini             | 216                            | Instant Rice (ckd)      |
| 0.5              |                              | Salt                        | 165                           | Spinach (ckd)            | 0.5                           | Salt                        | 150                            | Spinach (ckd)           |
| 6                |                              | Sugar                       | 10                            | Olive Oil                | 60                            | Whole Grain Sourdough Bread | 5                              | Canola Oil              |
| 138              |                              | Apple                       | 75                            | Apricots, in Heavy Syrup | 138                           | Apple                       | 20                             | White Bread             |
|                  |                              |                             |                               |                          | 120                           | Apple Juice                 | 5                              | Margarine               |
|                  |                              |                             |                               |                          |                               |                             | 260                            | Watermelon              |
| <b>Snack</b>     | 40                           | Celery Sticks               | 60                            | Celery Sticks            | 138                           | Apple                       | 120                            | Pomegranate Juice       |
|                  | 21                           | Peanut Butter               | 21                            | Peanut Butter            | 21                            | Peanut Butter               | 30                             | Celery Sticks           |
|                  | 122                          | Skim Milk                   | 113                           | Cottage Cheese           | 244                           | 1% Milk                     | 16                             | Peanut Butter           |
|                  | 17                           | Soy Nuts                    | 20                            | Popcorn                  |                               |                             | 15                             | Cheddar Cheese, Light   |
|                  | 20                           | Prunes                      |                               |                          |                               |                             | 20                             | Popcorn                 |

eTable 1n. Sample menus for Friday for each study diet, 2500 kcals

|                  | Low Carb, Low Glycemic Index |                          | Low Carb, High Glycemic Index |                          | High Carb, Low Glycemic Index |                             | High Carb, High Glycemic Index |                        |
|------------------|------------------------------|--------------------------|-------------------------------|--------------------------|-------------------------------|-----------------------------|--------------------------------|------------------------|
| Meal             | g                            | Food Item                | g                             | Food Item                | g                             | Food Item                   | g                              | Food Item              |
| <b>Breakfast</b> | 45                           | Whole Grain French Toast | 70                            | Waffles                  | 50                            | Whole Grain French Toast    | 70                             | Waffles                |
|                  | 150                          | Strawberries             | 28                            | Honey                    | 24                            | Diet Syrup                  | 28                             | Honey                  |
|                  | 6                            | Sugar                    | 21                            | Pecans                   | 15                            | Margarine                   | 10                             | Margarine              |
|                  | 15                           | Pecans                   | 46                            | Vegetarian Sausage       | 120                           | Apple Juice                 | 23                             | Vegetarian Sausage     |
|                  | 46                           | Vegetarian Sausage       | 140                           | Egg Substitute           | 244                           | 1% Milk                     | 120                            | Egg Substitute         |
|                  | 100                          | Egg Substitute           | 5                             | Margarine                | 200                           | Strawberries                | 5                              | Canola Oil             |
|                  | 5                            | Canola Oil               | 14                            | Raisins                  | 180                           | Orange Sections             | 195                            | Banana                 |
|                  | 10                           | Margarine                |                               |                          |                               |                             |                                |                        |
|                  | 180                          | Orange Sections          |                               |                          |                               |                             |                                |                        |
|                  | <b>Lunch</b>                 | 50                       | Whole Grain Sourdough Bread   | 56                       | White Bread                   | 85                          | Whole Grain Sourdough Bread    | 56                     |
| 90               |                              | Vegetarian Burger        | 62                            | Tuna Fish                | 80                            | Vegetarian Burger           | 85                             | Pimento Cheese Filling |
| 40               |                              | Cheddar Cheese, light    | 12                            | Mayonnaise               | 28                            | Cheddar Cheese, light       | 45                             | Lettuce                |
| 10               |                              | Margarine                |                               | Salad:                   | 10                            | Margarine                   | 260                            | Stewed Tomatoes        |
| 75               |                              | Broccoli Salad           | 60                            | Baby Spinach             | 100                           | Broccoli Salad              | 6                              | Wheat Bran             |
| 13               |                              | Olive Oil                | 75                            | Tomatoes                 | 5                             | Olive Oil                   | 115                            | Broccoli Salad         |
| 20               |                              | Dried Apricots           | 10                            | Olive Oil                | 28                            | Dried Apricots              | 10                             | Olive Oil              |
| 244              |                              | 1% Milk                  | 244                           | 2% Milk                  | 50                            | Prunes                      | 28                             | Raisins                |
|                  |                              |                          | 60                            | Broccoli Salad           |                               |                             | 270                            | Cantaloupe             |
|                  |                              |                          | 24                            | Soy Nuts                 |                               |                             |                                |                        |
|                  |                              |                          | 150                           | Watermelon               |                               |                             |                                |                        |
|                  |                              |                          | 150                           | Cantaloupe               |                               |                             |                                |                        |
| <b>Dinner</b>    |                              | 200                      | Cod                           | 140                      | Cod                           | 85                          | Cod                            | 80                     |
|                  | 22                           | Olive Oil                | 12                            | Olive Oil                | 12                            | Olive Oil                   | 10                             | Olive Oil              |
|                  | 0.6                          | Old Bay Seasoning        | 7                             | Wheat Bran               | 0.6                           | Old Bay Seasoning           | 4                              | Wheat Bran             |
|                  | 100                          | Brown Basmati Rice       | 0.6                           | Old Bay Seasoning        | 125                           | Brown Basmati Rice          | 0.6                            | Old Bay Seasoning      |
|                  | 113                          | Herbed Zucchini          | 126                           | Instant Rice (ckd)       | 103                           | Herbed Zucchini             | 288                            | Instant Rice (ckd)     |
|                  | 0.5                          | Salt                     | 160                           | Herbed Zucchini          | 1                             | Salt                        | 130                            | Spinach (ckd)          |
|                  | 5                            | Margarine                | 10                            | Olive Oil                | 60                            | Whole Grain Sourdough Bread | 28                             | White Bread            |
|                  | 180                          | Apple                    | 113                           | Cottage Cheese           | 20                            | Nutella Spread              | 10                             | Margarine              |
|                  | 28                           | Pumpnickel Bread         | 130                           | Apricots, in Heavy Syrup | 138                           | Apple                       | 275                            | Watermelon             |
|                  | 4                            | Life Saver Peppermints   |                               |                          | 8                             | Mints, Sugar Free           | 8                              | Peppermints            |
|                  | <b>Snack</b>                 | 20                       | Peanuts                       | 60                       | Celery Sticks                 | 138                         | Apple                          | 240                    |
| 244              |                              | 1% Milk                  | 14                            | Raisins                  | 21                            | Peanut Butter               | 50                             | Celery Sticks          |
| 22               |                              | Soy Nuts                 | 18                            | Peanuts                  | 244                           | 1% Milk                     | 21                             | Peanut Butter          |
| 20               |                              | Prunes                   | 26                            | Popcorn                  | 50                            | Whole Grain Sourdough Bread | 21                             | Cheddar Cheese, Light  |
|                  |                              |                          | 34                            | Cheddar Cheese, Light    |                               |                             | 15                             | Popcorn                |

eTable 1o. Sample menus for Friday for each study diet, 3000 kcals

|                  | Low Carb, Low Glycemic Index |                          | Low Carb, High Glycemic Index |                          | High Carb, Low Glycemic Index |                             | High Carb, High Glycemic Index |                          |
|------------------|------------------------------|--------------------------|-------------------------------|--------------------------|-------------------------------|-----------------------------|--------------------------------|--------------------------|
| Meal             | g                            | Food Item                | g                             | Food Item                | g                             | Food Item                   | g                              | Food Item                |
| <b>Breakfast</b> | 52                           | Whole Grain French Toast | 83                            | Waffles                  | 56                            | Whole Grain French Toast    | 53                             | Waffles                  |
|                  | 200                          | Strawberries             | 28                            | Honey                    | 24                            | Diet Syrup                  | 42                             | Honey                    |
|                  | 9                            | Sugar                    | 18                            | Pecans                   | 15                            | Margarine                   | 15                             | Margarine                |
|                  | 28                           | Pecans                   | 46                            | Vegetarian Sausage       | 12                            | Pecans                      | 35                             | Vegetarian Sausage       |
|                  | 46                           | Vegetarian Sausage       | 180                           | Egg Substitute           | 9                             | Sugar                       | 90                             | Egg Substitute           |
|                  | 180                          | Egg Substitute           | 5                             | Canola Oil               | 244                           | 1% Milk                     | 244                            | 2% Milk                  |
|                  | 10                           | Margarine                | 225                           | Cantaloupe               | 200                           | Strawberries                | 260                            | Banana                   |
|                  | 165                          | Apple                    |                               |                          | 200                           | Orange Sections             |                                |                          |
|                  | <b>Lunch</b>                 | 39                       | Whole Grain Sourdough Bread   | 60                       | White Bread                   | 90                          | Whole Grain Sourdough Bread    | 84                       |
| 125              |                              | Vegetarian Burger        | 80                            | Tuna Fish                | 90                            | Vegetarian Burger           | 90                             | Pimento Cheese Filling   |
| 48               |                              | Cheddar Cheese, light    | 12                            | Mayonnaise               | 24                            | Cheddar Cheese, light       | 53                             | Lettuce                  |
| 5                |                              | Margarine                |                               | Salad:                   | 10                            | Margarine                   | 200                            | Stewed Tomatoes          |
| 90               |                              | Broccoli Salad           | 45                            | Green Peppers            | 30                            | Tomato, raw                 | 7                              | Wheat Bran               |
| 15               |                              | Olive Oil                | 80                            | Tomatoes                 | 120                           | Broccoli Salad              | 120                            | Broccoli Salad           |
| 21               |                              | Dried Apricots           | 50                            | Lettuce                  | 0.8                           | Salt                        | 11                             | Olive Oil                |
| 21               |                              | Dried Apples             | 10                            | Olive Oil                | 33                            | Dried Apricots              | 42                             | Raisins                  |
| 244              |                              | 1% Milk                  | 75                            | Broccoli Salad           | 60                            | Prunes                      | 360                            | Watermelon               |
|                  |                              |                          | 25                            | Soy Nuts                 | 244                           | 1% Milk                     |                                |                          |
|                  |                              |                          | 300                           | Watermelon               |                               |                             |                                |                          |
|                  |                              |                          | 28                            | Cheddar Cheese, Light    |                               |                             |                                |                          |
|                  |                              |                          | 244                           | 1% Milk                  |                               |                             |                                |                          |
| <b>Dinner</b>    |                              | 220                      | Cod                           | 200                      | Cod                           | 90                          | Cod                            | 98                       |
|                  | 29                           | Olive Oil                | 15                            | Olive Oil                | 15                            | Olive Oil                   | 10                             | Olive Oil                |
|                  | 0.2                          | Old Bay Seasoning        | 10                            | Wheat Bran               | 0.6                           | Old Bay Seasoning           | 5                              | Wheat Bran               |
|                  | 125                          | Brown Basmati Rice       | 0.6                           | Old Bay Seasoning        | 238                           | Brown Basmati Rice          | 1.6                            | Old Bay Seasoning        |
|                  | 113                          | Herbed Zucchini          | 252                           | Instant Rice (ckd)       | 141                           | Herbed Zucchini             | 324                            | Instant Rice (ckd)       |
|                  | 200                          | Apple Juice              | 120                           | Spinach (ckd)            | 0.5                           | Salt                        | 150                            | Spinach (ckd)            |
|                  | 150                          | Orange Sections          | 20                            | Olive Oil                | 50                            | Whole Grain Sourdough Bread | 8                              | Canola Oil               |
|                  | 122                          | Skim Milk                | 112                           | Apricots, in Heavy Syrup | 200                           | Apple Juice                 | 28                             | White Bread              |
|                  |                              |                          |                               |                          | 20                            | Mints, Sugar Free           | 10                             | Margarine                |
|                  |                              |                          |                               |                          |                               |                             | 165                            | Apricots, in Heavy Syrup |
| <b>Snack</b>     | 60                           | Celery Sticks            | 90                            | Celery Sticks            | 200                           | Apple                       | 180                            | Pomegranate Juice        |
|                  | 42                           | Peanut Butter            | 32                            | Peanut Butter            | 42                            | Peanut Butter               | 45                             | Celery Sticks            |
|                  | 26                           | Soy Nuts                 | 113                           | Cottage Cheese           | 14                            | Jelly                       | 24                             | Peanut Butter            |
|                  | 30                           | Prunes                   | 35                            | Popcorn                  | 122                           | 2% Milk                     | 21                             | Cheddar Cheese, Light    |
|                  |                              |                          |                               |                          |                               | Whole Grain Sourdough Bread |                                |                          |
|                  |                              |                          | 14                            | Raisins                  | 40                            | Bread                       | 20                             | Peanut Butter            |

eTable 1p. Sample menus for Saturday for each study diet, 2000 kcals

|                  | Low Carb, Low Glycemic Index |                             | Low Carb, High Glycemic Index |                         | High Carb, Low Glycemic Index |                              | High Carb, High Glycemic Index |                          |
|------------------|------------------------------|-----------------------------|-------------------------------|-------------------------|-------------------------------|------------------------------|--------------------------------|--------------------------|
| Meal             | g                            | Food Item                   | g                             | Food Item               | g                             | Food Item                    | g                              | Food Item                |
| <b>Breakfast</b> | 135                          | Apple                       | 120                           | Cranberry Juice         | 180                           | Apple Juice                  | 170                            | Pomegranate Juice        |
|                  | 170                          | Quiche                      | 150                           | Quiche                  | 75                            | Quiche                       | 150                            | Quiche                   |
|                  | 244                          | Skim Milk                   | 23                            | Vegetarian Sausage      | 244                           | 1% Milk                      | 240                            | Cantaloupe               |
|                  | 32                           | Pecans                      | 56                            | White Bread             | 60                            | Whole Grain Sourdough Bread  | 56                             | White Bread              |
|                  | 170                          | Yogurt                      | 10                            | Margarine               | 20                            | Margarine                    | 20                             | Margarine                |
|                  |                              |                             | 21                            | Cheddar Cheese, Light   | 115                           | Orange Sections              |                                |                          |
|                  |                              | 14                          | Pecans                        |                         |                               |                              |                                |                          |
| <b>Lunch</b>     | 245                          | Chicken Barley Bake         | 80                            | Chicken Couscous Salad  | 173                           | Chicken Barley Bake          | 84                             | Chicken Couscous Salad   |
|                  | 28                           | Soy Nuts                    | 35                            | Diced Chicken           | 60                            | Whole Grain Sourdough Bread  | 84                             | White Bread              |
|                  | 60                           | Salad:                      | 12                            | Olive Oil               |                               | Salad:                       |                                | Salad:                   |
|                  | 50                           | Romaine Lettuce             | 28                            | White Bread             | 35                            | Baby Spinach                 | 50                             | Baby Spinach             |
|                  |                              | Tomatoes                    | 5                             | Margarine               | 20                            | Tomatoes                     | 50                             | Tomatoes                 |
|                  | 16/5                         | Olive Oil/Balsamic Vinegar  | 120                           | Broccoli, (ckd)         | 8/5                           | Canola Oil/Balssamic Vinegar | 4                              | Olive Oil                |
|                  | 32                           | Dried Apricots              | 14                            | Slivered Almonds        | 10                            | Margarine                    | 23                             | Slivered Almonds         |
|                  |                              |                             | 28                            | Raisins                 | 14                            | Jelly                        | 28                             | Raisins                  |
|                  |                              | 122                         | Skim Milk                     | 170                     | Pear                          |                              |                                |                          |
| <b>Dinner</b>    | 75                           | Turkey Breast               | 70                            | Turkey Breast           | 40                            | Turkey Breast                | 35                             | Turkey Breast            |
|                  | 50                           | Gravy                       | 60                            | Gravy                   | 50                            | Gravy                        | 60                             | Gravy                    |
|                  | 36                           | Egg Noodles (al dente, ckd) | 155                           | Instant Mashed Potatoes | 132                           | Egg Noodles (al dente, ckd)  | 158                            | Instant Mashed Potatoes  |
|                  | 60                           | Kale (ckd)                  | 155                           | Kale (ckd)              | 90                            | Kale (ckd)                   | 130                            | Kale (ckd)               |
|                  | 1                            | Salt                        | 5                             | Olive Oil               | 0.4                           | Salt                         | 0.5                            | Salt                     |
|                  | 14                           | Canola Oil                  | 42                            | White Bread             | 6                             | Olive Oil                    | 28                             | White Bread              |
|                  | 10                           | Margarine                   | 5                             | Margarine               | 20                            | Whole Grain Sourdough Bread  | 5                              | Margarine                |
|                  | 50                           | Whole Grain Sourdough Bread | 150                           | Cantaloupe              | 10                            | Margarine                    | 14                             | Honey                    |
|                  | 150                          | Apple                       |                               |                         | 120                           | Apple                        | 60                             | Apricots, in Heavy Syrup |
|                  | 122                          | 1% Milk                     |                               |                         | 180                           | Strawberries                 | 180                            | Cranberry Juice          |
| <b>Snack</b>     | 45                           | Whole Grain Sourdough Bread | 28                            | White Bread             | 244                           | Skim Milk                    | 244                            | 2% Milk                  |
|                  | 60                           | Tuna Fish                   | 55                            | Tuna Fish               | 30                            | Nutella Spread               | 30                             | Popcorn                  |
|                  | 12                           | Mayonnaise                  | 12                            | Mayonnaise              | 20                            | Dried Apples                 | 15                             | Dried Cranberries        |
|                  | 120                          | Apple Juice                 | 70                            | Romaine Lettuce         |                               |                              |                                |                          |
|                  |                              |                             | 175                           | Cantaloupe              |                               |                              |                                |                          |

eTable 1q. Sample menus for Saturday for each study diet, 2500 kcals

| Meal             | Low Carb, Low Glycemic Index |                             | Low Carb, High Glycemic Index |                         | High Carb, Low Glycemic Index |                              | High Carb, High Glycemic Index |                          |
|------------------|------------------------------|-----------------------------|-------------------------------|-------------------------|-------------------------------|------------------------------|--------------------------------|--------------------------|
|                  | g                            | Food Item                   | g                             | Food Item               | g                             | Food Item                    | g                              | Food Item                |
| <b>Breakfast</b> | 150                          | Apple                       | 120                           | Cantaloupe              | 163                           | Tomato Juice                 | 163                            | Pomegranate Juice        |
|                  | 150                          | Quiche                      | 150                           | Quiche                  | 150                           | Quiche                       | 150                            | Quiche                   |
|                  | 244                          | 1% Milk                     | 46                            | Vegetarian Sausage      | 244                           | 1% Milk                      | 180                            | Cantaloupe               |
|                  | 25                           | Pecans                      | 84                            | White Bread             | 90                            | Whole Grain Sourdough Bread  | 70                             | White Bread              |
|                  | 175                          | Orange Sections             | 10                            | Margarine               | 25                            | Margarine                    | 20                             | Margarine                |
|                  | 69                           | Vegetarian Sausage          | 20                            | Pecans                  | 25                            | Jelly                        | 14                             | Honey                    |
|                  |                              |                             | 122                           | Skim Milk               | 155                           | Apple                        | 122                            | 2% Milk                  |
| <b>Lunch</b>     | 288                          | Chicken Barley Bake         | 143                           | Chicken Couscous Salad  | 245                           | Chicken Barley Bake          | 160                            | Chicken Couscous Salad   |
|                  | 40                           | Diced Chicken               | 35                            | Diced Chicken           | 75                            | Whole Grain Sourdough Bread  | 56                             | White Bread              |
|                  | 6                            | Canola Oil                  | 19                            | Olive Oil               |                               | Salad:                       | 10                             | Margarine                |
|                  | 60                           | Romaine Lettuce             | 28                            | White Bread             | 30                            | Romaine Lettuce              |                                | Salad:                   |
|                  | 40                           | Tomatoes                    | 5                             | Margarine               | 50                            | Tomatoes                     | 60                             | Romaine Lettuce          |
|                  | 16/5                         | Olive Oil/Balsamic Vinegar  | 135                           | Broccoli, (ckd)         | 6/5                           | Canola Oil/Balssamic Vinegar | 60                             | Tomatoes                 |
|                  | 35                           | Dried Apricots              | 25                            | Cheddar Cheese, Light   | 15                            | Pecans                       | 9                              | Olive Oil                |
|                  | 45                           | Whole Grain Sourdough Bread | 42                            | Raisins                 | 30                            | Dried Apricots               | 170                            | Orange Juice             |
|                  |                              |                             |                               |                         | 190                           | Pear                         | 42                             | Raisins                  |
| <b>Dinner</b>    | 90                           | Turkey Breast               | 86                            | Turkey Breast           | 40                            | Turkey Breast                | 45                             | Turkey Breast            |
|                  | 60                           | Gravy                       | 40                            | Gravy                   | 50                            | Gravy                        | 75                             | Gravy                    |
|                  | 110                          | Egg Noodles (al dente, ckd) | 176                           | Instant Mashed Potatoes | 176                           | Egg Noodles (al dente, ckd)  | 185                            | Instant Mashed Potatoes  |
|                  | 100                          | Kale (ckd)                  | 130                           | Kale (ckd)              | 90                            | Kale (ckd)                   | 190                            | Kale (ckd)               |
|                  | 1                            | Salt                        | 56                            | White Bread             | 0.8                           | Salt                         | 0.7                            | Salt                     |
|                  | 17                           | Canola Oil                  | 5                             | Margarine               | 6                             | Olive Oil                    | 56                             | White Bread              |
|                  | 15                           | Margarine                   |                               | Salad:                  |                               | Whole Grain Sourdough Bread  | 5                              | Margarine                |
|                  | 150                          | Pear                        | 65                            | Romaine Lettuce         | 55                            | Bread                        | 14                             | Honey                    |
|                  | 122                          | 1% Milk                     | 40                            | Cucumbers               | 15                            | Margarine                    | 115                            | Apricots, in Heavy Syrup |
|                  |                              |                             | 12                            | Olive Oil               | 165                           | Orange Sections              | 120                            | Cranberry Juice          |
|                  |                              | 120                         | Cranberry Juice               |                         |                               |                              |                                |                          |
| <b>Snack</b>     | 50                           | Whole Grain Sourdough Bread | 28                            | White Bread             | 120                           | Apple Juice                  | 25                             | Dried Cranberries        |
|                  | 30                           | Peanut Butter               | 67                            | Tuna Fish               | 28                            | Nutella Spread               | 40                             | Popcorn                  |
|                  | 244                          | Skim Milk                   | 12                            | Mayonnaise              | 15                            | Dried Apples                 | 20                             | Slivered Almonds         |
|                  |                              |                             | 35                            | Celery Stick            | 244                           | 2% Milk                      | 15                             | Cheddar Cheese, Light    |
|                  |                              |                             | 180                           | Cantaloupe              |                               |                              | 2                              | Crystal Light            |
|                  |                              |                             | 122                           | 1% Milk                 |                               |                              |                                |                          |

eTable 1r. Sample menus for Saturday for each study diet, 3000 kcals

| Meal             | Low Carb, Low Glycemic Index |                             | Low Carb, High Glycemic Index |                         | High Carb, Low Glycemic Index |                              | High Carb, High Glycemic Index |                          |                        |
|------------------|------------------------------|-----------------------------|-------------------------------|-------------------------|-------------------------------|------------------------------|--------------------------------|--------------------------|------------------------|
|                  | g                            | Food Item                   | g                             | Food Item               | g                             | Food Item                    | g                              | Food Item                |                        |
| <b>Breakfast</b> | 200                          | Apple                       | 240                           | Cranberry Juice         | 240                           | Apple Juice                  | 120                            | Pomegranate Juice        |                        |
|                  | 225                          | Quiche                      | 150                           | Quiche                  | 75                            | Quiche                       | 150                            | Quiche                   |                        |
|                  | 366                          | 1% Milk                     | 69                            | Vegetarian Sausage      | 244                           | 1% Milk                      | 360                            | Cantaloupe               |                        |
|                  | 32                           | Pecans                      | 56                            | White Bread             | 105                           | Whole Grain Sourdough Bread  | 84                             | White Bread              |                        |
|                  | 120                          | Apple Juice                 | 10                            | Margarine               | 30                            | Margarine                    | 25                             | Margarine                |                        |
|                  | 69                           | Vegetarian Sausage          | 21                            | Cheddar Cheese, Light   | 46                            | Vegetarian Sausage           | 18                             | Honey                    |                        |
|                  |                              |                             | 22                            | Pecans                  | 138                           | Orange Sections              | 46                             | Vegetarian Sausage       |                        |
|                  |                              |                             | 122                           | Skim Milk               |                               |                              |                                |                          |                        |
|                  | <b>Lunch</b>                 | 370                         | Chicken Barley Bake           | 160                     | Chicken Couscous Salad        | 254                          | Chicken Barley Bake            | 164                      | Chicken Couscous Salad |
|                  |                              | 35                          | Soy Nuts                      | 50                      | Diced Chicken                 | 120                          | Whole Grain Sourdough Bread    | 84                       | White Bread            |
| 45               |                              | Whole Grain Sourdough Bread | 15                            | Olive Oil               |                               | Salad:                       | 14                             | Jelly                    |                        |
| 10               |                              | Margarine                   | 56                            | White Bread             | 40                            | Romaine Lettuce              |                                | Salad:                   |                        |
|                  |                              | Salad:                      | 10                            | Margarine               | 25                            | Tomatoes                     | 85                             | Romaine Lettuce          |                        |
| 60               |                              | Romaine Lettuce             | 125                           | Broccoli, (ckd)         | 11/5                          | Canola Oil/Balssamic Vinegar | 90                             | Cucumbers                |                        |
| 17/5             |                              | Olive Oil/Balsamic Vinegar  | 15                            | Slivered Almonds        | 15                            | Margarine                    | 5                              | Olive Oil                |                        |
| 20               |                              | Dried Apricots              | 28                            | Raisins                 | 14                            | Jelly                        | 50                             | Dried Cranberries        |                        |
|                  |                              |                             | 122                           | Skim Milk               | 230                           | Pear                         | 30                             | Slivered Almonds         |                        |
| <b>Dinner</b>    |                              | 120                         | Turkey Breast                 | 110                     | Turkey Breast                 | 50                           | Turkey Breast                  | 55                       | Turkey Breast          |
|                  | 65                           | Gravy                       | 60                            | Gravy                   | 65                            | Gravy                        | 40                             | Gravy                    |                        |
|                  | 80                           | Egg Noodles (al dente, ckd) | 176                           | Instant Mashed Potatoes | 194                           | Egg Noodles (al dente, ckd)  | 167                            | Instant Mashed Potatoes  |                        |
|                  | 40                           | Kale (ckd)                  | 225                           | Kale (ckd)              | 110                           | Kale (ckd)                   | 190                            | Kale (ckd)               |                        |
|                  | 0.5                          | Salt                        | 14                            | Olive Oil               | 7                             | Olive Oil                    | 0.9                            | Salt                     |                        |
|                  | 213                          | Canola Oil                  | 56                            | White Bread             | 45                            | Whole Grain Sourdough Bread  | 70                             | White Bread              |                        |
|                  | 15                           | Margarine                   | 5                             | Margarine               | 20                            | Margarine                    | 15                             | Margarine                |                        |
|                  | 60                           | Whole Grain Sourdough Bread | 14                            | Honey                   | 170                           | Apple                        | 18                             | Honey                    |                        |
|                  | 125                          | Pear                        | 250                           | Cantaloupe              | 220                           | Strawberries                 | 90                             | Apricots, in Heavy Syrup |                        |
|                  | 120                          | 1% Milk                     |                               |                         |                               |                              | 240                            | Cranberry Juice          |                        |
| <b>Snack</b>     | 65                           | Whole Grain Sourdough Bread | 28                            | White Bread             | 366                           | Skim Milk                    | 366                            | 2% Milk                  |                        |
|                  | 42                           | Peanut Butter               | 70                            | Tuna Fish               | 45                            | Nutella Spread               | 50                             | Popcorn                  |                        |
|                  | 244                          | Skim Milk                   | 12                            | Mayonnaise              | 22                            | Dried Apples                 | 14                             | Raisins                  |                        |
|                  |                              |                             | 4                             | Canola Oil              |                               |                              |                                |                          |                        |
|                  |                              |                             | 10                            | Dried Cranberries       |                               |                              |                                |                          |                        |
|                  |                              |                             | 35                            | Popcorn                 |                               |                              |                                |                          |                        |

eTable 1s. Sample menus for Sunday for each study diet, 2000 kcals

| Meal             | Low Carb, Low Glycemic Index |                             | Low Carb, High Glycemic Index |                          | High Carb, Low Glycemic Index |                             | High Carb, High Glycemic Index |                          |
|------------------|------------------------------|-----------------------------|-------------------------------|--------------------------|-------------------------------|-----------------------------|--------------------------------|--------------------------|
|                  | g                            | Food Item                   | g                             | Food Item                | g                             | Food Item                   | g                              | Food Item                |
| <b>Breakfast</b> | 28                           | Kashi Go Lean               | 21                            | Cheerios                 | 28                            | Kashi Go Lean               | 34                             | Cheerios                 |
|                  |                              | Whole Grain Sourdough Bread |                               |                          |                               |                             |                                |                          |
|                  | 26                           | Bread                       | 5                             | Wheat Bran               | 6                             | Sugar                       | 6                              | Wheat Bran               |
|                  | 244                          | Skim Milk                   | 244                           | 2% Milk                  | 244                           | 2% Milk                     | 244                            | Skim Milk                |
|                  | 50                           | Ham                         | 40                            | Turkey Sausage           | 40                            | Prunes                      | 200                            | Cantaloupe               |
|                  | 100                          | Blueberries                 | 75                            | Carrot and Bran Muffin   | 100                           | Blueberries                 | 75                             | Carrot and Bran Muffin   |
|                  | 21                           | Slivered Almonds            | 5                             | Margarine                | 20                            | Slivered Almonds            | 10                             | Margarine                |
|                  | 10                           | Margarine                   |                               |                          |                               |                             |                                |                          |
| <b>Lunch</b>     |                              | Whole Grain Sourdough Bread |                               |                          |                               | Whole Grain Sourdough Bread |                                |                          |
|                  | 35                           | Bread                       | 56                            | White Bread              | 65                            | Bread                       | 45                             | White Bread              |
|                  | 150                          | Tuna Salad                  | 130                           | Tuna Salad               | 70                            | Tuna Salad                  | 85                             | Tuna Salad               |
|                  | 10                           | Canola Oil                  | 5                             | Canola Oil               | 60                            | Pasta Salad                 | 11                             | Canola Oil               |
|                  |                              | Salad:                      |                               | Salad:                   |                               | Salad:                      |                                | Salad:                   |
|                  | 45                           | Lettuce                     | 60                            | Baby Spinach             | 40                            | Romaine Lettuce             | 50                             | Baby Spinach             |
|                  | 60                           | Tomatoes                    | 45                            | Tomatoes                 | 45                            | Tomatoes                    | 50                             | Tomatoes                 |
|                  |                              | Canola Oil/Balsamic         |                               |                          |                               |                             |                                |                          |
|                  | 11/5                         | Vinegar                     | 18                            | Olive Oil                | 10/5                          | Olive Oil/Balsamic Vinegar  | 10                             | Olive Oil                |
|                  | 21                           | Cheddar Cheese, Light       | 210                           | Cantaloupe               | 159                           | Orange Sections             | 143                            | Banana                   |
|                  | 20                           | Dried Apples                | 122                           | 2% Milk                  | 163                           | Tomato Juice                | 35                             | Pretzels                 |
| 30               | Dried Apricots               |                             |                               | 15                       | Margarine                     |                             |                                |                          |
| <b>Dinner</b>    | 120                          | Pork Tenderloin             | 90                            | Pork Tenderloin          | 36                            | Pork Tenderloin             | 50                             | Pork Tenderloin          |
|                  | 62                           | Bulgur Salad                | 76                            | Couscous                 | 62                            | Bulgur Salad                | 95                             | Couscous                 |
|                  | 90                           | Turnip Greens (ckd)         | 140                           | Turnip Greens (ckd)      | 75                            | Turnip Greens (ckd)         | 120                            | Turnip Greens (ckd)      |
|                  | 0.7                          | Salt                        | 13                            | Canola Oil               | 6                             | Canola Oil                  | 28                             | White Bread              |
|                  | 6                            | Sugar                       | 35                            | White Bread              | 0.8                           | Salt                        | 10                             | Margarine                |
|                  |                              | Whole Grain Sourdough Bread |                               |                          |                               | Whole Grain Sourdough Bread |                                |                          |
|                  | 25                           | Bread                       | 14                            | Honey                    | 70                            | Bread                       | 122                            | 2% Milk                  |
|                  | 5                            | Margarine                   | 92                            | Gelatin, sugar free      | 10                            | Margarine                   | 140                            | Apricots, in Heavy Syrup |
|                  | 21                           | Peanut Butter               |                               |                          | 120                           | Apple Juice                 |                                |                          |
|                  | 138                          | Apple                       |                               |                          | 138                           | Apple                       |                                |                          |
|                  |                              |                             |                               |                          | 240                           | Yogurt                      |                                |                          |
| <b>Snack</b>     | 138                          | Apple                       | 120                           | Apricots, in Heavy Syrup | 40                            | Dried Apples                | 28                             | Raisins                  |
|                  | 25                           | Slivered Almonds            | 28                            | White Bread              | 8                             | Peanuts                     | 240                            | Cranberry Juice          |
|                  | 113                          | Cottage Cheese              | 50                            | Turkey Breast            | 113                           | Cottage Cheese              | 113                            | Cottage Cheese           |
|                  |                              |                             | 12                            | Mayonnaise               |                               |                             |                                |                          |



eTable 1t. Sample menus for Sunday for each study diet, 2500 kcals

|                  | Low Carb, Low Glycemic Index |                            | Low Carb, High Glycemic Index |                          | High Carb, Low Glycemic Index |                            | High Carb, High Glycemic Index |                          |
|------------------|------------------------------|----------------------------|-------------------------------|--------------------------|-------------------------------|----------------------------|--------------------------------|--------------------------|
| Meal             | g                            | Food Item                  | g                             | Food Item                | g                             | Food Item                  | g                              | Food Item                |
| <b>Breakfast</b> | 37                           | Kashi Go Lean              | 34                            | Cheerios                 | 28                            | Kashi Go Lean              | 45                             | Cheerios                 |
|                  |                              | Whole Grain Sourdough      |                               |                          |                               |                            |                                |                          |
|                  | 55                           | Bread                      | 8                             | Wheat Bran               | 6                             | Sugar                      | 6                              | Wheat Bran               |
|                  | 244                          | 2% Milk                    | 122                           | 2% Milk                  | 244                           | 1% Milk                    | 244                            | 1% Milk                  |
|                  | 60                           | Turkey Sausage             | 50                            | Turkey Sausage           | 40                            | Prunes                     | 28                             | Raisins                  |
|                  | 20                           | Margarine                  | 75                            | Carrot and Bran Muffin   | 160                           | Blueberries                | 75                             | Carrot and Bran Muffin   |
|                  | 120                          | Apple Juice                | 5                             | Margarine                | 24                            | Slivered Almonds           | 5                              | Margarine                |
|                  |                              | 18                         | Slivered Almonds              | 40                       | Whole Grain Sourdough         | 10                         | Peanuts                        |                          |
|                  |                              |                            |                               | 5                        | Bread                         |                            |                                |                          |
|                  |                              |                            |                               |                          | Margarine                     |                            |                                |                          |
| <b>Lunch</b>     | 55                           | Pumpnickel Bread           | 68                            | White Bread              | 100                           | Whole Grain Sourdough      | 72                             | White Bread              |
|                  | 190                          | Tuna Salad                 | 150                           | Tuna Salad               | 70                            | Bread                      | 100                            | Tuna Salad               |
|                  | 11                           | Canola Oil                 | 10                            | Olive Oil                | 80                            | Pasta Salad                | 9                              | Canola Oil               |
|                  |                              | Salad:                     |                               | Salad:                   | 12                            | Canola Oil                 |                                | Salad:                   |
|                  | 45                           | Baby Spinach               | 60                            | Baby Spinach             |                               | Salad:                     | 60                             | Baby Spinach             |
|                  | 50                           | Tomatoes                   | 60                            | Tomatoes                 | 40                            | Iceberg Lettuce            | 60                             | Tomatoes                 |
|                  | 13/5                         | Olive Oil/Balsamic Vinegar | 14                            | Olive Oil                | 55                            | Tomatoes                   | 11                             | Olive Oil                |
|                  | 25                           | Cheddar Cheese, Light      | 150                           | Pomegranite Juice        | 4/5                           | Olive Oil/Balsamic Vinegar | 120                            | Apricots, in Heavy Syrup |
|                  | 170                          | Apple                      | 244                           | 2% Milk                  | 100                           | Orange Sections            | 50                             | Pretzels                 |
|                  | 122                          | Skim Milk                  |                               |                          | 150                           | Strawberries               |                                |                          |
|                  |                              |                            |                               |                          | 122                           | Skim Milk                  |                                |                          |
|                  |                              |                            |                               | 5                        | Margarine                     |                            |                                |                          |
| <b>Dinner</b>    | 105                          | Pork Tenderloin            | 100                           | Pork Tenderloin          | 40                            | Pork Tenderloin            | 50                             | Pork Tenderloin          |
|                  | 77                           | Bulgur Salad               | 105                           | Couscous                 | 77                            | Bulgur Salad               | 143                            | Couscous                 |
|                  | 100                          | Turnip Greens (ckd)        | 120                           | Turnip Greens (ckd)      | 100                           | Turnip Greens (ckd)        | 125                            | Turnip Greens (ckd)      |
|                  | 0.5                          | Salt                       | 10                            | Canola Oil               | 3                             | Canola Oil                 | 40                             | White Bread              |
|                  | 7                            | Canola Oil                 | 56                            | White Bread              | 1.4                           | Salt                       | 10                             | Margarine                |
|                  |                              | Whole Grain Sourdough      |                               |                          |                               | Whole Grain Sourdough      |                                |                          |
|                  | 40                           | Bread                      | 10                            | Margarine                | 80                            | Bread                      | 122                            | 2% Milk                  |
|                  | 30                           | Peanuts                    | 60                            | Apricots, in Heavy Syrup | 10                            | Margarine                  | 170                            | Apricots, in Heavy Syrup |
|                  | 20                           | Dried Apples               |                               |                          | 32                            | Dried Apricots             |                                |                          |
|                  | 18                           | Dried Apricots             |                               |                          | 30                            | Twix® Cookie Bar, mini     |                                |                          |
|                  |                              |                            |                               | 240                      | Yogurt                        |                            |                                |                          |
| <b>Snack</b>     | 260                          | Orange Sections            | 175                           | Cantaloupe               | 138                           | Apple                      | 250                            | Cantaloupe               |
|                  | 32                           | Slivered Almonds           | 56                            | White Bread              | 21                            | Peanut Butter              | 113                            | Cottage Cheese           |
|                  | 113                          | Cottage Cheese             | 70                            | Turkey Breast            | 113                           | Cottage Cheese             | 28                             | Dried Cranberries        |
|                  |                              |                            | 12                            | Mayonnaise               | 200                           | Apple Juice                | 15                             | Slivered Almonds         |

eTable 1u. Sample menus for Sunday for each study diet, 3000 kcals

| Meal             | Low Carb, Low Glycemic Index |                             | Low Carb, High Glycemic Index |                          | High Carb, Low Glycemic Index |                             | High Carb, High Glycemic Index |                          |
|------------------|------------------------------|-----------------------------|-------------------------------|--------------------------|-------------------------------|-----------------------------|--------------------------------|--------------------------|
|                  | g                            | Food Item                   | g                             | Food Item                | g                             | Food Item                   | g                              | Food Item                |
| <b>Breakfast</b> | 42                           | Kashi Go Lean               | 35                            | Cheerios                 | 42                            | Kashi Go Lean               | 45                             | Cheerios                 |
|                  |                              | Whole Grain Sourdough Bread |                               |                          |                               |                             |                                |                          |
|                  | 30                           | Bread                       | 8                             | Wheat Bran               | 6                             | Sugar                       | 5                              | Wheat Bran               |
|                  | 366                          | Skim Milk                   | 244                           | 2% Milk                  | 244                           | 1% Milk                     | 244                            | 2% Milk                  |
|                  | 75                           | Ham                         | 80                            | Turkey Sausage           | 60                            | Prunes                      | 200                            | Cantaloupe               |
|                  | 200                          | Blueberries                 | 75                            | Carrot and Bran Muffin   | 150                           | Blueberries                 | 150                            | Carrot and Bran Muffin   |
|                  |                              |                             |                               |                          |                               | Whole Grain Sourdough       |                                |                          |
|                  | 31                           | Slivered Almonds            | 15                            | Margarine                | 20                            | Bread                       | 10                             | Margarine                |
| 15               | Margarine                    | 65                          | Egg Substitute                | 10                       | Margarine                     |                             |                                |                          |
|                  |                              | 5                           | Canola Oil                    | 21                       | Peanut Butter                 |                             |                                |                          |
| <b>Lunch</b>     | 225                          | Tuna Salad                  | 112                           | White Bread              | 60                            | Whole Grain Sourdough Bread | 68                             | White Bread              |
|                  | 15                           | Canola Oil                  | 195                           | Tuna Salad               | 100                           | Tuna Salad                  | 132                            | Tuna Salad               |
|                  | 35                           | Pasta Salad                 | 12                            | Olive Oil                | 140                           | Pasta Salad                 | 16                             | Canola Oil               |
|                  |                              | Salad:                      |                               | Salad:                   | 0.7                           | Salt                        |                                | Salad:                   |
|                  | 60                           | Lettuce                     | 60                            | Baby Spinach             | 12                            | Mayonnaise                  | 60                             | Baby Spinach             |
|                  | 60                           | Tomatoes                    | 65                            | Tomatoes                 |                               | Salad:                      | 60                             | Tomatoes                 |
|                  |                              | Canola Oil/Balsamic         |                               |                          |                               |                             |                                |                          |
|                  | 12/5                         | Vinegar                     | 16                            | Olive Oil                | 50                            | Iceberg Lettuce             | 8                              | Olive Oil                |
|                  | 42                           | Cheddar Cheese, Light       | 300                           | Cantaloupe               | 60                            | Tomatoes                    | 42                             | Raisins                  |
|                  | 200                          | Apple                       | 122                           | 2% Milk                  | 15/5                          | Olive Oil/Balsamic Vinegar  | 53                             | Pretzels                 |
|                  | 120                          | Apple Juice                 |                               |                          | 150                           | Orange Sections             |                                |                          |
|                  | 6                            | Sugar                       |                               |                          | 240                           | Apple Juice                 |                                |                          |
| <b>Dinner</b>    | 180                          | Pork Tenderloin             | 135                           | Pork Tenderloin          | 65                            | Pork Tenderloin             | 80                             | Pork Tenderloin          |
|                  | 92                           | Bulgur Salad                | 114                           | Couscous                 | 92                            | Bulgur Salad                | 152                            | Couscous                 |
|                  | 100                          | Turnip Greens (ckd)         | 180                           | Turnip Greens (ckd)      | 80                            | Turnip Greens (ckd)         | 150                            | Turnip Greens (ckd)      |
|                  | 1.2                          | Salt                        | 20                            | Canola Oil               | 8                             | Canola Oil                  | 5                              | Olive Oil                |
|                  | 5                            | Olive Oil                   | 75                            | Carrot and Bran Muffin   | 1.5                           | Salt                        | 0.8                            | Salt                     |
|                  |                              | Whole Grain Sourdough       |                               |                          |                               | Whole Grain Sourdough       |                                |                          |
|                  | 49                           | Bread                       | 14                            | Honey                    | 80                            | Bread                       | 50                             | White Bread              |
|                  | 10                           | Margarine                   | 92                            | Gelatin, sugar free      | 10                            | Margarine                   | 5                              | Margarine                |
|                  | 21                           | Peanut Butter               |                               |                          | 163                           | Tomato Juice                | 122                            | 2% Milk                  |
|                  | 200                          | Apple                       |                               |                          | 60                            | Dried Apples                | 210                            | Apricots, in Heavy Syrup |
|                  | 120                          | Apple Juice                 |                               |                          | 360                           | Yogurt                      |                                |                          |
|                  |                              |                             |                               |                          |                               |                             |                                |                          |
| <b>Snack</b>     | 40                           | Dried Apple                 | 150                           | Apricots, in Heavy Syrup | 200                           | Apple                       | 240                            | Cranberry Juice          |
|                  | 40                           | Slivered Almonds            | 42                            | White Bread              | 14                            | Slivered Almonds            | 113                            | Cottage Cheese           |
|                  | 113                          | Cottage Cheese              | 70                            | Turkey Breast            | 30                            | Twix® Cookie Bar, mini      | 215                            | Banana                   |
|                  |                              |                             | 5                             | Margarine                | 21                            | Cheddar Cheese, Light       | 10                             | Slivered Almonds         |
|                  |                              |                             | 12                            | Mayonnaise               | 122                           | 2% Milk                     |                                |                          |

**eTable 2. Effect of glycemic index and amount of carbohydrate on urinary nitrogen, creatinine, sodium, and potassium**

Diet Effects:

| Measure             | n   | Baseline    |     | CG <sup>1</sup> |     | Cg <sup>2</sup> |     | cG <sup>3</sup> |     | cg <sup>4</sup> |   |
|---------------------|-----|-------------|-----|-----------------|-----|-----------------|-----|-----------------|-----|-----------------|---|
|                     |     | Mean (SD)   | n   | Mean (SD)       | n   | Mean (SD)       | n   | Mean (SD)       | n   | Mean (SD)       | n |
| Urine Nitrogen mg/d | 163 | 10144(4739) | 149 | 10227(3774)     | 153 | 10631(4349)     | 150 | 13773(5348)     | 154 | 14082(5656)     |   |
| Urine Sodium mmol/d | 163 | 152.7(77.9) | 149 | 121.2(57.4)     | 153 | 115.3(48.1)     | 150 | 122.7(53.6)     | 154 | 118.9(58.5)     |   |
| Urine K mmol/d      | 163 | 57.2(26)    | 149 | 77.4(31.5)      | 153 | 77.5(33.7)      | 150 | 76.1(30.5)      | 154 | 75(34)          |   |
| Urine Creat mg/d    | 163 | 1479(601)   | 149 | 1401(557)       | 153 | 1368(560)       | 150 | 1515(615)       | 154 | 1482(617)       |   |

Diet Contrasts: mean difference (95% CI) mean difference (95% CI)

| Measure        | n   | cg-CG               |         | Cg-CG |                     | cG-CG |     |                     |         |
|----------------|-----|---------------------|---------|-------|---------------------|-------|-----|---------------------|---------|
|                |     | Mean diff. (95% CI) | p       | n     | Mean diff. (95% CI) | p     | n   | Mean diff. (95% CI) | p       |
| Urine Nitrogen | 140 | 3887(3191, 4583)    | P<0.001 | 148   | 376(-234, 985)      | 0.23  | 136 | 3651(2858, 4444)    | P<0.001 |
| Urine Sodium   | 140 | -6.1(-15.5, 3.3)    | 0.20    | 148   | -6.6(-15.5, 2.2)    | 0.14  | 136 | 1.7(-8.2, 11.6)     | 0.74    |
| Urine K        | 140 | -2.7(-8.3, 2.9)     | 0.34    | 148   | 0.3(-5.5, 6)        | 0.92  | 136 | -1.2(-6.6, 4.2)     | 0.66    |
| Urine Creat    | 140 | 57(-16, 130)        | 0.13    | 148   | -40(-115, 36)       | 0.30  | 136 | 99(14, 184)         | 0.02    |

| Measure        | n   | cG-Cg               |         | cg-Cg |                     | cg-cG   |     |                     |      |
|----------------|-----|---------------------|---------|-------|---------------------|---------|-----|---------------------|------|
|                |     | Mean diff. (95% CI) | p       | n     | Mean diff. (95% CI) | p       | n   | Mean diff. (95% CI) | p    |
| Urine Nitrogen | 140 | 3237(2386, 4088)    | P<0.001 | 144   | 3497(2736, 4258)    | P<0.001 | 149 | 330(-380, 1041)     | 0.36 |
| Urine Sodium   | 140 | 7.5(-2.3, 17.3)     | 0.13    | 144   | 1.3(-8.2, 10.8)     | 0.79    | 149 | -3.9(-13.4, 5.6)    | 0.42 |
| Urine K        | 140 | -2(-7.4, 3.5)       | 0.48    | 144   | -4.2(-9.5, 1.2)     | 0.12    | 149 | -0.9(-6, 4.2)       | 0.73 |
| Urine Creat    | 140 | 134(52, 216)        | 0.002   | 144   | 94(12, 176)         | 0.03    | 149 | -29(-102, 43)       | 0.43 |

<sup>1</sup> CG = Higher Carbohydrate and Higher Glycemic Index

<sup>2</sup> Cg = Higher Carbohydrate and Lower Glycemic Index

<sup>3</sup> cG = Lower Carbohydrate and Higher Glycemic Index

<sup>4</sup> cg = Lower Carbohydrate and Lower Glycemic Index

**eTable 3. Study outcomes at Baseline Mean(SD) and during each diet period, and differences between diets**

| Diet Effects:       |          |                |                 |                |                 |              |                 |                |                 |                |
|---------------------|----------|----------------|-----------------|----------------|-----------------|--------------|-----------------|----------------|-----------------|----------------|
| Measure             | Baseline |                | CG <sup>1</sup> |                | Cg <sup>2</sup> |              | cG <sup>3</sup> |                | cg <sup>4</sup> |                |
|                     | n        | Mean(SD)       | n               | Mean(SD)       | n               | Mean(SD)     | n               | Mean(SD)       | n               | Mean(SD)       |
| Insulin Sensitivity | 162      | 7.3(5.8)       | 147             | 8.9(9.5)       | 153             | 7(6.4)       | 151             | 7.9(7.4)       | 151             | 8.1(10.3)      |
| OGTT Glucose AUCi   | 163      | 6051.6(2838.6) | 146             | 6834.2(3291)   | 153             | 6614.4(2972) | 149             | 6936.4(3328.4) | 150             | 6777.3(3396.3) |
| OGTT Insulin AUCi   | 162      | 4937(3659.8)   | 147             | 5176.6(4520.5) | 152             | 5243.4(3935) | 149             | 5020.2(3448.1) | 150             | 5044.4(3661)   |
| OGTT Glucose 1hr    | 163      | 168.6(42.6)    | 147             | 173(46.9)      | 153             | 173(43.5)    | 151             | 175.8(47.8)    | 153             | 177.3(46.4)    |
| OGTT Insulin 1hr    | 163      | 63(50.3)       | 148             | 62.7(57.8)     | 153             | 66.8(54.5)   | 151             | 64.4(47.3)     | 153             | 62.8(51.6)     |
| HOMA                | 163      | 1.9(1.6)       | 150             | 1.6(1.4)       | 153             | 1.9(1.9)     | 151             | 1.7(1.5)       | 153             | 1.9(1.9)       |
| Systolic BP         | 163      | 132(9.1)       | 150             | 123.9(11.5)    | 153             | 123.8(10.5)  | 152             | 122.6(10.3)    | 154             | 123.4(10.1)    |
| Diastolic BP        | 163      | 80(7.5)        | 150             | 75.3(8.2)      | 153             | 75.8(8.4)    | 152             | 74.4(8.2)      | 154             | 74.8(8.6)      |
| LDL-cholesterol     | 163      | 153(42.1)      | 150             | 138.6(36.6)    | 152             | 146.2(37.2)  | 151             | 138(36.1)      | 153             | 138(36.8)      |
| HDL-cholesterol     | 163      | 58.3(16)       | 150             | 56.9(15.1)     | 153             | 57.3(17.2)   | 151             | 59(17.5)       | 153             | 58.2(15.7)     |
| Triglycerides       | 163      | 104.6(67.1)    | 150             | 110.8(65.7)    | 153             | 107.4(59.2)  | 151             | 90.4(48.1)     | 153             | 86.4(48.1)     |
| 12-h Glucose AUCi   |          |                | 52              | 7127(4188)     | 49              | 6022(3719)   | 56              | 6283(4178)     | 57              | 6023(4653)     |
| 12-h Insulin AUCi   |          |                | 52              | 11472(7215)    | 50              | 11458(7553)  | 56              | 11373(7281)    | 56              | 10270(7107)    |

**Diet Contrasts: mean difference (95% CI)**

| Measure              | n   | cg-CG                |         | Cg-CG               |                      | cG-CG               |     | p                     |         |
|----------------------|-----|----------------------|---------|---------------------|----------------------|---------------------|-----|-----------------------|---------|
|                      |     | Mean diff. (95% CI)  | p       | Mean diff. (95% CI) | p                    | Mean diff. (95% CI) | p   |                       |         |
| Insulin Sensitivity* | 136 | -0.8(-3.6, 2.1)      | 0.49    | 146                 | -1.8(-2.9, -0.7)     | 0.002               | 135 | -1(-2.6, 0.5)         | 0.19    |
| OGTT Glucose AUCi    | 134 | -49.4(-401.6, 302.8) | 0.78    | 145                 | -236.1(-567.2, 94.9) | 0.16                | 132 | 171.1(-172.6, 514.8)  | 0.33    |
| OGTT Insulin AUCi    | 135 | -200.9(-848.9, 447)  | 0.54    | 145                 | 32.8(-555.2, 620.9)  | 0.91                | 133 | -117.4(-784.4, 549.6) | 0.73    |
| OGTT Glucose 1hr     | 137 | 4.9(0.1, 9.7)        | 0.05    | 146                 | 0(-4.9, 4.8)         | P>0.99              | 135 | 5.2(0, 10.3)          | 0.05    |
| OGTT Insulin 1hr     | 138 | 0.2(-7, 7.3)         | 0.96    | 147                 | 4.4(-3.2, 12)        | 0.26                | 136 | 2.5(-5.8, 10.7)       | 0.55    |
| HOMA                 | 140 | 0.1(-0.1, 0.4)       | 0.35    | 149                 | 0.3(0, 0.6)          | 0.04                | 138 | 0.1(-0.1, 0.3)        | 0.47    |
| Systolic BP*         | 141 | -0.6(-2.2, 0.9)      | 0.28    | 149                 | -0.4(-1.4, 0.7)      | 0.47                | 139 | -1.3(-2.5, 0)         | 0.06    |
| Diastolic BP         | 141 | -0.7(-1.5, 0.1)      | 0.09    | 149                 | 0.3(-0.4, 0.9)       | 0.38                | 139 | -1.1(-1.8, -0.4)      | 0.003   |
| LDL-cholesterol*     | 140 | -0.2(-4.3, 3.8)      | 0.88    | 148                 | 7.8(4.2, 11.3)       | P<0.001             | 138 | 0(-3.7, 3.6)          | 0.98    |
| HDL-cholesterol*     | 140 | 1.7(-0.1, 3.5)       | 0.02    | 149                 | 0.7(-1.1, 2.5)       | 0.45                | 138 | 2.6(0.9, 4.3)         | 0.003   |
| Triglycerides*       | 140 | -25(-34.5, -15.5)    | P<0.001 | 149                 | -4.7(-10.6, 1.3)     | 0.13                | 138 | -20.3(-27.9, -12.7)   | P<0.001 |
| 12-h Glucose AUCi    | 48  | -1433(-2497, -369)   | 0.009   | 48                  | -1216(-2481, 49)     | 0.06                | 47  | -1363(-2368, -359)    | 0.009   |
| 12-h Insulin AUCi    | 47  | -1795(-3622, 32)     | 0.05    | 49                  | -358(-1747, 1030)    | 0.61                | 47  | -711(-2357, 936)      | 0.39    |

<sup>1</sup> CG = Higher Carbohydrate and Higher Glycemic Index

<sup>2</sup> Cg = Higher Carbohydrate and Lower Glycemic Index

<sup>3</sup> cG = Lower Carbohydrate and Higher Glycemic Index

<sup>4</sup> cg = Lower Carbohydrate and Lower Glycemic Index

\*Primary outcomes calculated at 99% CI

**eTable 3. Outcomes, continued**

| Measure              | n   | cG-Cg                 |         |     | cg-Cg                |         |     | cg-cG                |      |  |
|----------------------|-----|-----------------------|---------|-----|----------------------|---------|-----|----------------------|------|--|
|                      |     | Mean diff. (95% CI)   | p       | n   | Mean diff. (95% CI)  | p       | n   | Mean diff. (95% CI)  | p    |  |
| Insulin Sensitivity* | 141 | 0.9(-0.2, 1.9)        | 0.10    | 142 | 1.1(-0.7, 2.9)       | 0.24    | 147 | 0.3(-1.6, 2.1)       | 0.78 |  |
| OGTT Glucose AUCi    | 139 | 458.7(96.9, 820.4)    | 0.01    | 141 | 259.2(-100.5, 618.9) | 0.16    | 144 | -294(-635.7, 47.7)   | 0.09 |  |
| OGTT Insulin AUCi    | 138 | -137.6(-619.5, 344.3) | 0.57    | 140 | -131.2(-636.3, 374)  | 0.61    | 144 | -91.8(-533.2, 349.7) | 0.68 |  |
| OGTT Glucose 1hr     | 141 | 5(-0.6, 10.5)         | 0.08    | 143 | 5.2(0, 10.4)         | 0.05    | 149 | -0.2(-5.4, 5.1)      | 0.95 |  |
| OGTT Insulin 1hr     | 141 | -1.6(-8.4, 5.2)       | 0.64    | 143 | -3.1(-9.7, 3.6)      | 0.37    | 149 | -2.2(-8.7, 4.3)      | 0.51 |  |
| HOMA                 | 141 | -0.2(-0.5, 0)         | 0.10    | 143 | -0.1(-0.5, 0.2)      | 0.37    | 149 | 0.1(-0.1, 0.4)       | 0.38 |  |
| Systolic BP*         | 142 | -1.3(-2.4, -0.2)      | 0.02    | 144 | -0.5(-1.5, 0.5)      | 0.35    | 150 | 0.7(-0.3, 1.6)       | 0.15 |  |
| Diastolic BP         | 142 | -1.6(-2.4, -0.9)      | P<0.001 | 144 | -1(-1.8, -0.2)       | 0.01    | 150 | 0.5(-0.2, 1.2)       | 0.17 |  |
| LDL-cholesterol*     | 140 | -7.8(-11.7, -4)       | P<0.001 | 142 | -8.3(-11.9, -4.8)    | P<0.001 | 149 | -0.4(-3.3, 2.4)      | 0.77 |  |
| HDL-cholesterol*     | 141 | 2(-0.1, 4.1)          | 0.07    | 143 | 1.1(-0.9, 3.1)       | 0.26    | 149 | -0.7(-2.1, 0.6)      | 0.29 |  |
| Triglycerides*       | 141 | -16.8(-22.2, -11.4)   | P<0.001 | 143 | -21.1(-27.4, -14.8)  | P<0.001 | 149 | -4.5(-8.2, -0.8)     | 0.02 |  |
| 12-h Glucose AUCi    | 44  | -34(-1422, 1354)      | 0.96    | 45  | -372(-2025, 1280)    | 0.65    | 56  | -223(-1167, 721)     | 0.64 |  |
| 12-h Insulin AUCi    | 45  | -8(-1749, 1734)       | P>0.99  | 45  | -1456(-3536, 624)    | 0.17    | 55  | -1170(-2229, -112)   | 0.03 |  |

<sup>1</sup> CG = Higher Carbohydrate and Higher Glycemic Index

<sup>2</sup> Cg = Higher Carbohydrate and Lower Glycemic Index

<sup>3</sup> cG = Lower Carbohydrate and Higher Glycemic Index

<sup>4</sup> cg = Lower Carbohydrate and Lower Glycemic Index

\*Primary outcomes calculated at 99% CI

Baseline Mean(SD) measurements taken during screening visits while participants were eating their own diets.

Insulin sensitivity determined from blood glucose and insulin levels during a 2-hour 7-time point oral glucose tolerance test by the method of Matsuda & DeFronzo.

Units: blood pressure = mmHg; cholesterol and triglycerides = mg/dL.

HOMA: Homeostatic model assessment of insulin resistance.

Apolipoproteins and other lipoprotein measurements are shown in eTable 4.

**eTable 4. Apolipoproteins B, C-III and E; and lipoprotein cholesterol and triglyceride**

Diet Effects:

| Measure          | Baseline |            | CG <sup>1</sup> |             | Cg <sup>2</sup> |             | cG <sup>3</sup> |            | cg <sup>4</sup> |            |
|------------------|----------|------------|-----------------|-------------|-----------------|-------------|-----------------|------------|-----------------|------------|
|                  | n        | Mean(SD)   | n               | Mean(SD)    | n               | Mean(SD)    | n               | Mean(SD)   | n               | Mean(SD)   |
| ApoB WP          | 163      | 81.5(25.3) | 150             | 76.9(24.1)  | 153             | 80.2(23.8)  | 151             | 73.9(22.7) | 153             | 75.7(24.1) |
| ApoC-III WP      | 163      | 10.1(4.5)  | 150             | 10.2(4.8)   | 153             | 10.3(5)     | 151             | 9.6(4.5)   | 153             | 9.6(4.2)   |
| ApoE WP          | 163      | 8(2.8)     | 150             | 7.4(2.9)    | 153             | 7.5(2.6)    | 151             | 7.5(2.7)   | 153             | 7.4(2.7)   |
| ApoB VLDL        | 163      | 4.5(3.2)   | 150             | 4.9(3.4)    | 153             | 4.9(3.3)    | 151             | 4(3.3)     | 153             | 4(3.4)     |
| ApoC-III VLDL    | 163      | 1.2(1.3)   | 150             | 1.4(1.3)    | 153             | 1.3(1.3)    | 150             | 1.2(1.2)   | 153             | 1.2(1.2)   |
| ApoE VLDL        | 163      | 0.5(0.5)   | 150             | 0.6(0.4)    | 153             | 0.6(0.5)    | 151             | 0.5(0.4)   | 153             | 0.5(0.4)   |
| Cholesterol VLDL | 163      | 15.8(13)   | 150             | 16.4(12.9)  | 152             | 16.2(12.8)  | 151             | 13.1(12)   | 153             | 12.5(10.6) |
| TG VLDL          | 163      | 51.3(43.9) | 150             | 57.7(48.2)  | 152             | 56.6(47.7)  | 151             | 45.2(39.5) | 153             | 43.8(41)   |
| ApoB LDL         | 163      | 76.3(24)   | 150             | 71.1(22.3)  | 153             | 74.4(22)    | 151             | 69.2(21.1) | 153             | 71(22.5)   |
| ApoC-III LDL     | 143      | 2.8(2.4)   | 129             | 2.8(2.4)    | 137             | 3.1(2.9)    | 135             | 2.7(2.5)   | 134             | 2.7(2.3)   |
| ApoE LDL         | 156      | 2.6(1.3)   | 142             | 2.3(1.3)    | 149             | 2.4(1.2)    | 146             | 2.4(1.4)   | 150             | 2.4(1.4)   |
| Cholesterol LDL  | 163      | 153(42.1)  | 150             | 138.6(36.6) | 152             | 146.2(37.2) | 151             | 138(36.1)  | 153             | 138(36.8)  |
| TG LDL           | 163      | 53.4(42.8) | 149             | 53.4(38.2)  | 152             | 51.1(30.3)  | 150             | 45.6(24.4) | 153             | 42.6(18.9) |
| ApoB Very Dense  | 163      | 0.7(0.8)   | 150             | 0.9(1.4)    | 153             | 0.9(1.3)    | 151             | 0.7(0.9)   | 153             | 0.7(0.9)   |
| ApoC-III HDL     | 163      | 6.6(3.4)   | 150             | 6.5(3.5)    | 153             | 6.3(3.4)    | 151             | 6.1(3.3)   | 153             | 6.2(3.4)   |
| ApoE HDL         | 163      | 5.1(2.4)   | 150             | 4.8(2.3)    | 153             | 4.7(2.2)    | 151             | 4.7(2.2)   | 153             | 4.7(2.3)   |

<sup>1</sup> CG = Higher Carbohydrate and Higher Glycemic Index<sup>2</sup> Cg = Higher Carbohydrate and Lower Glycemic Index<sup>3</sup> cG = Lower Carbohydrate and Higher Glycemic Index<sup>4</sup> cg = Lower Carbohydrate and Lower Glycemic Index

Units: mg/dL

**eTable 4, continued. Apolipoproteins B, C-III and E; and lipoprotein cholesterol and triglyceride**

| Diet Contrasts: mean difference (95% CI) |     |                     |         |     |                     |         |     |                     |         |
|------------------------------------------|-----|---------------------|---------|-----|---------------------|---------|-----|---------------------|---------|
| Measure                                  | n   | cg-CG               |         | n   | Cg-CG               |         | n   | cG-CG               |         |
|                                          |     | Mean diff. (95% CI) | p       |     | Mean diff. (95% CI) | p       |     | Mean diff. (95% CI) | p       |
| ApoB WP                                  | 140 | -0.9(-3.4, 1.7)     | 0.50    | 149 | 3.3(0.8, 5.8)       | 0.01    | 138 | -1.8(-4.8, 1.2)     | 0.24    |
| ApoC-III WP                              | 140 | -0.4(-0.9, 0)       | 0.05    | 149 | 0.1(-0.3, 0.5)      | 0.74    | 138 | -0.4(-0.8, 0)       | 0.06    |
| ApoE WP                                  | 140 | 0.13(-0.09, 0.35)   | 0.23    | 149 | 0.08(-0.14, 0.3)    | 0.49    | 138 | 0.19(-0.03, 0.42)   | 0.09    |
| ApoB VLDL                                | 140 | -0.9(-1.3, -0.5)    | P<0.001 | 149 | 0(-0.4, 0.3)        | 0.81    | 138 | -0.7(-1.1, -0.3)    | 0.001   |
| ApoC-III VLDL                            | 140 | -0.2(-0.4, 0)       | 0.01    | 149 | -0.1(-0.2, 0)       | 0.18    | 137 | -0.2(-0.3, 0)       | 0.02    |
| ApoE VLDL                                | 140 | -0.11(-0.16, -0.06) | P<0.001 | 149 | -0.02(-0.07, 0.03)  | 0.47    | 138 | -0.05(-0.11, 0)     | 0.06    |
| Cholesterol VLDL                         | 140 | -3.9(-5.4, -2.4)    | P<0.001 | 148 | -0.4(-1.5, 0.6)     | 0.39    | 138 | -3(-4.6, -1.4)      | P<0.001 |
| TG VLDL                                  | 140 | -14.2(-20, -8.4)    | P<0.001 | 148 | -1.9(-6.3, 2.4)     | 0.38    | 138 | -12.1(-18, -6.2)    | P<0.001 |
| ApoB LDL                                 | 140 | 0.2(-2.3, 2.7)      | 0.87    | 149 | 3.3(0.9, 5.8)       | 0.008   | 138 | -0.9(-3.8, 2.1)     | 0.56    |
| ApoC-III LDL                             | 108 | 0(-0.4, 0.3)        | 0.80    | 119 | 0.4(0, 0.7)         | 0.04    | 108 | 0(-0.3, 0.3)        | 0.89    |
| ApoE LDL                                 | 131 | 0.17(-0.02, 0.36)   | 0.08    | 138 | 0.12(-0.03, 0.27)   | 0.12    | 126 | 0.16(-0.02, 0.34)   | 0.08    |
| Cholesterol LDL                          | 140 | -0.2(-3.3, 2.8)     | 0.88    | 148 | 7.8(4.2, 11.3)      | P<0.001 | 138 | 0(-3.7, 3.6)        | 0.98    |
| TG LDL                                   | 139 | -11.2(-16.3, -6)    | P<0.001 | 147 | -3.2(-6.8, 0.3)     | 0.08    | 136 | -8.3(-13.6, -3.1)   | 0.002   |
| ApoB Very Dense                          | 140 | -0.2(-0.4, 0)       | 0.06    | 149 | 0(-0.2, 0.2)        | 0.96    | 138 | -0.2(-0.5, 0)       | 0.06    |
| ApoC-III HDL                             | 140 | -0.2(-0.5, 0.2)     | 0.32    | 149 | -0.2(-0.5, 0.1)     | 0.12    | 138 | -0.3(-0.6, 0)       | 0.09    |
| ApoE HDL                                 | 140 | 0.02(-0.19, 0.24)   | 0.83    | 149 | -0.12(-0.3, 0.05)   | 0.17    | 138 | 0.01(-0.2, 0.23)    | 0.90    |

<sup>1</sup> CG = Higher Carbohydrate and Higher Glycemic Index

<sup>2</sup> Cg = Higher Carbohydrate and Lower Glycemic Index

<sup>3</sup> cG = Lower Carbohydrate and Higher Glycemic Index

<sup>4</sup> cg = Lower Carbohydrate and Lower Glycemic Index

Units: mg/dL

**eTable 4, continued. Apolipoproteins B, C-III and E; and lipoprotein cholesterol and triglyceride**

Diet Contrasts: mean difference (95% CI)

| Measure          | n   | cG-Cg               |         | n   | cg-Cg               |         | n   | cg-cG               |      |
|------------------|-----|---------------------|---------|-----|---------------------|---------|-----|---------------------|------|
|                  |     | Mean diff. (95% CI) | p       |     | Mean diff. (95% CI) | p       |     | Mean diff. (95% CI) | p    |
| ApoB WP          | 141 | -5.7(-8.7, -2.7)    | P<0.001 | 143 | -4.4(-7.3, -1.6)    | 0.002   | 149 | 1.3(-1.1, 3.7)      | 0.30 |
| ApoC-III WP      | 141 | -0.6(-1, -0.1)      | 0.02    | 143 | -0.6(-1, -0.1)      | 0.02    | 149 | -0.1(-0.4, 0.3)     | 0.77 |
| ApoE WP          | 141 | 0.05(-0.18, 0.27)   | 0.68    | 143 | -0.02(-0.24, 0.19)  | 0.83    | 149 | -0.08(-0.26, 0.1)   | 0.38 |
| ApoB VLDL        | 141 | -0.7(-1.2, -0.3)    | P<0.001 | 143 | -0.9(-1.3, -0.4)    | P<0.001 | 149 | -0.1(-0.5, 0.3)     | 0.61 |
| ApoC-III VLDL    | 140 | -0.1(-0.2, 0)       | 0.20    | 143 | -0.1(-0.2, 0.1)     | 0.21    | 148 | 0(-0.2, 0.1)        | 0.81 |
| ApoE VLDL        | 141 | -0.04(-0.1, 0.01)   | 0.15    | 143 | -0.08(-0.14, -0.02) | 0.007   | 149 | -0.05(-0.1, 0)      | 0.05 |
| Cholesterol VLDL | 140 | -3(-4.3, -1.8)      | P<0.001 | 142 | -3.8(-5.2, -2.5)    | P<0.001 | 149 | -0.8(-1.9, 0.4)     | 0.20 |
| TG VLDL          | 140 | -11.4(-16, -6.7)    | P<0.001 | 142 | -12.7(-18.2, -7.1)  | P<0.001 | 149 | -1.9(-5.4, 1.7)     | 0.30 |
| ApoB LDL         | 141 | -4.7(-7.5, -1.9)    | 0.001   | 143 | -3.4(-6, -0.8)      | 0.01    | 149 | 1.3(-1, 3.7)        | 0.26 |
| ApoC-III LDL     | 117 | -0.3(-0.7, 0)       | 0.04    | 117 | -0.4(-0.8, 0)       | 0.06    | 121 | 0(-0.4, 0.3)        | 0.93 |
| ApoE LDL         | 133 | -0.03(-0.22, 0.15)  | 0.72    | 137 | -0.03(-0.21, 0.14)  | 0.71    | 142 | -0.03(-0.18, 0.12)  | 0.68 |
| Cholesterol LDL  | 140 | -7.8(-11.7, -4)     | P<0.001 | 142 | -8.3(-11.9, -4.8)   | P<0.001 | 149 | -0.4(-3.3, 2.4)     | 0.77 |
| TG LDL           | 139 | -5.4(-9.1, -1.6)    | 0.006   | 142 | -8.7(-12.4, -5)     | P<0.001 | 148 | -2.7(-4.8, -0.6)    | 0.01 |
| ApoB Very Dense  | 141 | -0.2(-0.4, 0)       | 0.03    | 143 | -0.2(-0.4, 0)       | 0.08    | 149 | 0(-0.1, 0.2)        | 0.83 |
| ApoC-III HDL     | 141 | 0(-0.4, 0.3)        | 0.77    | 143 | 0(-0.3, 0.3)        | 0.96    | 149 | 0(-0.2, 0.3)        | 0.73 |
| ApoE HDL         | 141 | 0.1(-0.09, 0.29)    | 0.29    | 143 | 0.08(-0.11, 0.27)   | 0.41    | 149 | -0.01(-0.16, 0.13)  | 0.85 |

<sup>1</sup> CG = Higher Carbohydrate and Higher Glycemic Index

<sup>2</sup> Cg = Higher Carbohydrate and Lower Glycemic Index

<sup>3</sup> cG = Lower Carbohydrate and Higher Glycemic Index

<sup>4</sup> cg = Lower Carbohydrate and Lower Glycemic Index



**eTable 5. Outcomes: Constant Cohort:** The cohort that completed all 4 diets on each measure. The N's vary with completeness by measure.

Diet Effects:

| Measure             | Baseline |                | CG <sup>1</sup> |                | Cg <sup>2</sup> |                | cG <sup>3</sup> |                | cg <sup>4</sup> |                |
|---------------------|----------|----------------|-----------------|----------------|-----------------|----------------|-----------------|----------------|-----------------|----------------|
|                     | n        | Mean(SD)       | n               | Mean(SD)       | n               | Mean(SD)       | n               | Mean(SD)       | n               | Mean(SD)       |
| Insulin Sensitivity | 130      | 7.5(6)         | 130             | 9(9.9)         | 130             | 7.1(6.8)       | 130             | 7.9(7.7)       | 130             | 8.3(11)        |
| OGTT Glucose AUCi   | 127      | 6023.5(2902.1) | 127             | 6857.9(3286.7) | 127             | 6490.7(3034.3) | 127             | 7030.4(3323.4) | 127             | 6726(3419)     |
| OGTT Insulin AUCi   | 126      | 5022.5(3755.7) | 126             | 5274.5(4659.2) | 126             | 5297.4(4050.8) | 126             | 5137.7(3542.6) | 126             | 5055.6(3677.8) |
| OGTT Glucose 1hr    | 132      | 167.1(43.3)    | 132             | 171.6(47.7)    | 132             | 170.8(44.3)    | 132             | 176.9(46.8)    | 132             | 176.2(47.2)    |
| OGTT Insulin 1hr    | 133      | 63(52.1)       | 133             | 63.2(59.6)     | 133             | 67.5(56.3)     | 133             | 66(49.4)       | 133             | 62.9(51.8)     |
| HOMA                | 135      | 1.9(1.6)       | 135             | 1.7(1.4)       | 135             | 2(2)           | 135             | 1.7(1.5)       | 135             | 1.8(1.9)       |
| Systolic BP         | 136      | 132.2(9.2)     | 136             | 123.9(11.3)    | 136             | 123.8(10.5)    | 136             | 122.6(9.8)     | 136             | 123.2(9.9)     |
| Diastolic BP        | 136      | 80.2(7.3)      | 136             | 75.5(8.1)      | 136             | 75.9(8.1)      | 136             | 74.3(7.9)      | 136             | 74.8(8.1)      |
| LDL-cholesterol     | 134      | 155.9(41.9)    | 134             | 139.8(36.7)    | 134             | 147.9(36.5)    | 134             | 139.8(35.2)    | 134             | 139.7(36.6)    |
| HDL-cholesterol     | 135      | 58.4(16.3)     | 135             | 56.9(15.5)     | 135             | 57.5(17.6)     | 135             | 59.5(17.6)     | 135             | 58.6(15.6)     |
| Triglycerides       | 135      | 103.2(64.2)    | 135             | 111.5(68)      | 135             | 107.5(61.4)    | 135             | 91.1(49.7)     | 135             | 86(48.2)       |
| 12-h Glucose AUCi   |          |                | 43              | 7291(4272)     | 43              | 5911(3639)     | 43              | 5964(3977)     | 43              | 5685(4756)     |
| 12-h Insulin AUCi   |          |                | 43              | 11826(7560)    | 43              | 11576(7972)    | 43              | 11570(7484)    | 43              | 10034(7261)    |

<sup>1</sup> CG = Higher Carbohydrate and Higher Glycemic Index

<sup>2</sup> Cg = Higher Carbohydrate and Lower Glycemic Index

<sup>3</sup> cG = Lower Carbohydrate and Higher Glycemic Index

<sup>4</sup> cg = Lower Carbohydrate and Lower Glycemic Index

Baseline Mean(SD) measurements taken during screening visits while participants were eating their own diets.

Insulin sensitivity determined from blood glucose and insulin levels during a 2-hour 7-time point oral glucose tolerance test by the method of Matsuda & DeFronzo.

Units: blood pressure = mmHg; cholesterol and triglycerides = mg/dL.

**eTable 5. Outcomes: Constant Cohort, continued**

Diet Contrasts: mean difference (95% CI)

| Measure              | n   | cg-CG                 |         | n   | Cg-CG               |         | n   | cG-CG                |         |
|----------------------|-----|-----------------------|---------|-----|---------------------|---------|-----|----------------------|---------|
|                      |     | Mean diff. (95% CI)   | p       |     | Mean diff. (95% CI) | p       |     | Mean diff. (95% CI)  | p       |
| Insulin Sensitivity* | 130 | -0.7(-3.7, 2.2)       | 0.53    | 130 | -1.9(-3.2, -0.7)    | 0.002   | 130 | -1.2(-2.8, 0.5)      | 0.16    |
| OGTT Glucose AUCi    | 127 | -131.9(-466.2, 202.4) | 0.44    | 127 | -367.2(-693, -41.4) | 0.03    | 127 | 172.5(-177.3, 522.3) | 0.33    |
| OGTT Insulin AUCi    | 126 | -218.9(-906.2, 468.3) | 0.53    | 126 | 22.9(-625.9, 671.8) | 0.94    | 126 | -136.8(-836.6, 563)  | 0.70    |
| OGTT Glucose 1hr     | 132 | 4.5(-0.3, 9.4)        | 0.07    | 132 | -0.8(-5.8, 4.2)     | 0.75    | 132 | 5.3(0.1, 10.6)       | 0.05    |
| OGTT Insulin 1hr     | 133 | -0.3(-7.7, 7.1)       | 0.94    | 133 | 4.4(-3.8, 12.5)     | 0.29    | 133 | 2.8(-5.6, 11.2)      | 0.51    |
| HOMA                 | 135 | 0.1(-0.1, 0.4)        | 0.32    | 135 | 0.3(0, 0.6)         | 0.05    | 135 | 0.1(-0.1, 0.3)       | 0.47    |
| Systolic BP*         | 136 | -0.7(-2.3, 0.9)       | 0.27    | 136 | 0(-1.1, 1)          | 0.93    | 136 | -1.3(-2.6, 0)        | 0.05    |
| Diastolic BP         | 136 | -0.6(-1.5, 0.2)       | 0.12    | 136 | 0.5(-0.2, 1.2)      | 0.15    | 136 | -1.1(-1.9, -0.4)     | 0.003   |
| LDL-cholesterol*     | 134 | -0.1(-4.3, 4.1)       | 0.93    | 134 | 8.1(4.3, 11.8)      | P<0.001 | 134 | 0(-3.8, 3.8)         | P>0.99  |
| HDL-cholesterol*     | 135 | 1.6(-0.2, 3.5)        | 0.02    | 135 | 0.6(-1.4, 2.6)      | 0.55    | 135 | 2.5(0.8, 4.2)        | 0.004   |
| Triglycerides*       | 135 | -25.5(-35.2, -15.7)   | P<0.001 | 135 | -4(-10.4, 2.4)      | 0.22    | 135 | -20.4(-28.2, -12.6)  | P<0.001 |
| 12-h Glucose AUCi    | 43  | -1606(-2741, -471)    | 0.007   | 43  | -1380(-2764, 4)     | 0.05    | 43  | -1327(-2369, -284)   | 0.01    |
| 12-h Insulin AUCi    | 43  | -1792(-3782, 199)     | 0.08    | 43  | -250(-1801, 1301)   | 0.75    | 43  | -255(-1901, 1390)    | 0.76    |

<sup>1</sup> CG = Higher Carbohydrate and Higher Glycemic Index

<sup>2</sup> Cg = Higher Carbohydrate and Lower Glycemic Index

<sup>3</sup> cG = Lower Carbohydrate and Higher Glycemic Index

<sup>4</sup> cg = Lower Carbohydrate and Lower Glycemic Index

\*Primary outcomes calculated at 99% CI

**eTable 5. Outcomes: Constant Cohort, continued**

Diet Contrasts: mean difference (95% CI)

| Measure              | n   | cG-Cg<br>Mean diff. (95% CI) | p       | n   | cg-Cg<br>Mean diff. (95% CI) | p       | n   | cg-cG<br>Mean diff. (95% CI) | p    |
|----------------------|-----|------------------------------|---------|-----|------------------------------|---------|-----|------------------------------|------|
| Insulin Sensitivity* | 130 | 0.8(-0.3, 1.9)               | 0.16    | 130 | 1.2(-0.7, 3.2)               | 0.21    | 130 | 0.4(-1.6, 2.5)               | 0.67 |
| OGTT Glucose AUCi    | 127 | 539.7(179.2, 900.2)          | 0.004   | 127 | 235.3(-130.8, 601.3)         | 0.21    | 127 | -304.4(-643.5, 34.7)         | 0.08 |
| OGTT Insulin AUCi    | 126 | -159.8(-671.8, 352.2)        | 0.54    | 126 | -241.9(-772.5, 288.8)        | 0.37    | 126 | -82.1(-556.2, 392)           | 0.73 |
| OGTT Glucose 1hr     | 132 | 6.1(0.7, 11.5)               | 0.03    | 132 | 5.3(-0.1, 10.8)              | 0.05    | 132 | -0.8(-5.9, 4.3)              | 0.77 |
| OGTT Insulin 1hr     | 133 | -1.6(-8.7, 5.5)              | 0.66    | 133 | -4.6(-11.5, 2.3)             | 0.19    | 133 | -3.1(-9.7, 3.6)              | 0.36 |
| HOMA                 | 135 | -0.2(-0.5, 0.1)              | 0.12    | 135 | -0.2(-0.5, 0.2)              | 0.33    | 135 | 0.1(-0.2, 0.3)               | 0.71 |
| Systolic BP*         | 136 | -1.2(-2.4, -0.1)             | 0.03    | 136 | -0.6(-1.7, 0.5)              | 0.27    | 136 | 0.6(-0.3, 1.6)               | 0.20 |
| Diastolic BP         | 136 | -1.6(-2.4, -0.9)             | P<0.001 | 136 | -1.1(-2, -0.3)               | 0.009   | 136 | 0.5(-0.2, 1.2)               | 0.17 |
| LDL-cholesterol*     | 134 | -8.1(-12.1, -4)              | P<0.001 | 134 | -8.2(-11.9, -4.4)            | P<0.001 | 134 | -0.1(-3.1, 2.9)              | 0.93 |
| HDL-cholesterol*     | 135 | 1.9(-0.3, 4.1)               | 0.09    | 135 | 1(-1.1, 3.1)                 | 0.34    | 135 | -0.9(-2.4, 0.6)              | 0.24 |
| Triglycerides*       | 135 | -16.4(-22, -10.8)            | P<0.001 | 135 | -21.5(-28, -15)              | P<0.001 | 135 | -5(-8.8, -1.2)               | 0.01 |
| 12-h Glucose AUCi    | 43  | 53(-1357, 1463)              | 0.94    | 43  | -226(-1942, 1490)            | 0.79    | 43  | -280(-1225, 666)             | 0.55 |
| 12-h Insulin AUCi    | 43  | -6(-1753, 1742)              | P>0.99  | 43  | -1542(-3704, 620)            | 0.16    | 43  | -1536(-2795, -278)           | 0.02 |

<sup>1</sup> CG = Higher Carbohydrate and Higher Glycemic Index<sup>2</sup> Cg = Higher Carbohydrate and Lower Glycemic Index<sup>3</sup> cG = Lower Carbohydrate and Higher Glycemic Index<sup>4</sup> cg = Lower Carbohydrate and Lower Glycemic Index

\*Primary outcomes calculated at 99% CI

**eTable 6. Systolic Blood Pressure**

Diet Effects:

| Systolic BP (mmHg)   | Baseline |            | CG <sup>1</sup> |             | Cg <sup>2</sup> |             | cG <sup>3</sup> |             | cg <sup>4</sup> |             |
|----------------------|----------|------------|-----------------|-------------|-----------------|-------------|-----------------|-------------|-----------------|-------------|
|                      | n        | Mean(SD)   | n               | Mean(SD)    | n               | Mean(SD)    | n               | Mean(SD)    | n               | Mean(SD)    |
| Overall              | 163      | 132(9.1)   | 150             | 123.9(11.5) | 153             | 123.8(10.5) | 152             | 122.6(10.3) | 154             | 123.4(10.1) |
| Male                 | 78       | 131.9(9.9) | 69              | 125.7(10.8) | 72              | 125.7(10.3) | 75              | 125.5(9.4)  | 77              | 125.4(9.5)  |
| Female               | 85       | 132.1(8.3) | 81              | 122.3(11.9) | 81              | 122.1(10.4) | 77              | 119.8(10.5) | 77              | 121.4(10.4) |
| African American     | 83       | 132.7(9.5) | 77              | 122.9(11)   | 79              | 123.1(10.5) | 78              | 121.8(10.8) | 77              | 123.2(10.7) |
| Non African American | 80       | 131.2(8.6) | 73              | 124.8(12)   | 74              | 124.5(10.5) | 74              | 123.5(9.9)  | 77              | 123.6(9.6)  |
| Non Hypertensive     | 120      | 127.9(5)   | 110             | 121.3(10.2) | 112             | 121.1(9.3)  | 111             | 119.9(9)    | 113             | 121.1(9.2)  |
| Hypertensive         | 43       | 143.2(8.4) | 40              | 130.9(12.2) | 41              | 130.9(10.3) | 41              | 129.9(10.2) | 41              | 130(9.9)    |

Diet Contrasts: mean difference (99% CI)

| Systolic Blood Pressure (mmHg) | n   | cg-CG               |      | n   | Cg-CG               |      | n   | cG-CG               |      |
|--------------------------------|-----|---------------------|------|-----|---------------------|------|-----|---------------------|------|
|                                |     | Mean diff. (99% CI) | p    |     | Mean diff. (99% CI) | p    |     | Mean diff. (99% CI) | p    |
| Overall                        | 141 | -0.6(-2.2, 0.9)     | 0.28 | 149 | -0.4(-1.4, 0.7)     | 0.47 | 139 | -1.3(-2.5, 0)       | 0.06 |
| Male                           | 68  | -0.4(-2.4, 1.6)     | 0.59 | 69  | 0.1(-1.2, 1.4)      | 0.91 | 66  | -0.3(-2.1, 1.5)     | 0.74 |
| Female                         | 73  | -0.8(-3.2, 1.5)     | 0.35 | 80  | -0.8(-2.4, 0.9)     | 0.35 | 73  | -2.1(-4, -0.3)      | 0.02 |
| African American               | 71  | 0.2(-1.8, 2.3)      | 0.75 | 77  | -0.1(-1.4, 1.2)     | 0.88 | 72  | -0.9(-2.6, 0.7)     | 0.26 |
| Non African American           | 70  | -1.5(-3.8, 0.8)     | 0.08 | 72  | -0.7(-2.4, 1)       | 0.43 | 67  | -1.6(-3.6, 0.4)     | 0.12 |
| Non Hypertensive               | 103 | -0.4(-2.1, 1.2)     | 0.48 | 109 | -0.6(-1.8, 0.7)     | 0.39 | 101 | -1.3(-2.8, 0.1)     | 0.07 |
| Hypertensive                   | 38  | -1.1(-4.9, 2.6)     | 0.41 | 40  | 0.1(-2, 2.1)        | 0.96 | 38  | -1.1(-4, 1.8)       | 0.45 |

| Systolic Blood Pressure (mmHg) | n   | cG-Cg               |      | n   | cg-Cg               |      | n   | cg-cG               |      |
|--------------------------------|-----|---------------------|------|-----|---------------------|------|-----|---------------------|------|
|                                |     | Mean diff. (99% CI) | p    |     | Mean diff. (99% CI) | p    |     | Mean diff. (99% CI) | p    |
| Overall                        | 142 | -1.3(-2.4, -0.2)    | 0.02 | 144 | -0.5(-1.5, 0.5)     | 0.35 | 150 | 0.7(-0.3, 1.6)      | 0.15 |
| Male                           | 69  | -0.6(-2.3, 1.1)     | 0.46 | 71  | -0.5(-2, 0.9)       | 0.47 | 75  | 0(-1.3, 1.3)        | 0.98 |
| Female                         | 73  | -1.9(-3.3, -0.4)    | 0.01 | 73  | -0.5(-2, 1)         | 0.54 | 75  | 1.4(0, 2.7)         | 0.04 |
| African American               | 74  | -1.6(-3, -0.2)      | 0.03 | 73  | -0.2(-1.6, 1.1)     | 0.72 | 76  | 1.4(0.1, 2.7)       | 0.03 |
| Non African American           | 68  | -0.9(-2.6, 0.8)     | 0.30 | 71  | -0.8(-2.4, 0.9)     | 0.36 | 74  | -0.1(-1.4, 1.2)     | 0.90 |
| Non Hypertensive               | 103 | -1.1(-2.4, 0.2)     | 0.10 | 105 | -0.1(-1.3, 1)       | 0.86 | 110 | 1.1(0.1, 2.1)       | 0.03 |
| Hypertensive                   | 39  | -1.7(-3.8, 0.4)     | 0.11 | 39  | -1.6(-3.9, 0.8)     | 0.19 | 40  | -0.6(-2.7, 1.6)     | 0.59 |

<sup>1</sup> CG = Higher Carbohydrate and Higher Glycemic Index

<sup>2</sup> Cg = Higher Carbohydrate and Lower Glycemic Index

<sup>3</sup> cG = Lower Carbohydrate and Higher Glycemic Index

<sup>4</sup> cg = Lower Carbohydrate and Lower Glycemic Index

**eTable 7. Diastolic Blood Pressure**

Diet Effects:

| Diastolic BP (mmHg)  | Baseline |           | CG <sup>1</sup> |           | Cg <sup>2</sup> |           | cG <sup>3</sup> |           | cg <sup>4</sup> |           |
|----------------------|----------|-----------|-----------------|-----------|-----------------|-----------|-----------------|-----------|-----------------|-----------|
|                      | n        | Mean(SD)  | n               | Mean(SD)  | n               | Mean(SD)  | n               | Mean(SD)  | n               | Mean(SD)  |
| Overall              | 163      | 80(7.5)   | 150             | 75.3(8.2) | 153             | 75.8(8.4) | 152             | 74.4(8.2) | 154             | 74.8(8.6) |
| Male                 | 78       | 79.2(7.3) | 69              | 75.6(8)   | 72              | 75.9(8.4) | 75              | 74.4(7.8) | 77              | 74.5(7.7) |
| Female               | 85       | 80.8(7.6) | 81              | 75.1(8.5) | 81              | 75.7(8.5) | 77              | 74.3(8.6) | 77              | 75.1(9.4) |
| African American     | 83       | 81(6.9)   | 77              | 74.6(7.1) | 79              | 75.1(8.2) | 78              | 74(8.2)   | 77              | 74.6(8.4) |
| Non African American | 80       | 79(7.9)   | 73              | 76.1(9.3) | 74              | 76.4(8.6) | 74              | 74.7(8.3) | 77              | 75.1(8.9) |
| Non Hypertensive     | 120      | 77.8(6.1) | 110             | 73.9(7.7) | 112             | 74.2(7.9) | 111             | 72.6(7.1) | 113             | 73.4(8.1) |
| Hypertensive         | 43       | 86.2(7.5) | 40              | 79.3(8.5) | 41              | 79.9(8.6) | 41              | 79.1(9.1) | 41              | 78.8(8.8) |

Diet Contrasts: mean difference (95% CI)

| Diastolic Blood Pressure (mmHg) | n   | cg-CG               |      | n   | Cg-CG               |      | n   | cG-CG               |         |
|---------------------------------|-----|---------------------|------|-----|---------------------|------|-----|---------------------|---------|
|                                 |     | Mean diff. (95% CI) | p    |     | Mean diff. (95% CI) | p    |     | Mean diff. (95% CI) | p       |
| Overall                         | 141 | -0.7(-1.5, 0.1)     | 0.09 | 149 | 0.3(-0.4, 0.9)      | 0.38 | 139 | -1.1(-1.8, -0.4)    | 0.003   |
| Male                            | 68  | -0.9(-2, 0.3)       | 0.13 | 69  | 0.5(-0.4, 1.4)      | 0.29 | 66  | -1.1(-2.3, 0)       | 0.05    |
| Female                          | 73  | -0.5(-1.7, 0.6)     | 0.36 | 80  | 0.1(-0.8, 1)        | 0.83 | 73  | -1.1(-2.1, -0.1)    | 0.03    |
| African American                | 71  | 0.1(-0.9, 1)        | 0.91 | 77  | 0.5(-0.3, 1.3)      | 0.25 | 72  | -0.4(-1.4, 0.6)     | 0.42    |
| Non African American            | 70  | -1.4(-2.7, -0.2)    | 0.02 | 72  | 0.1(-0.9, 1.1)      | 0.87 | 67  | -1.9(-3, -0.8)      | 0.001   |
| Non Hypertensive                | 103 | -0.7(-1.6, 0.2)     | 0.11 | 109 | 0.2(-0.6, 1)        | 0.63 | 101 | -1.4(-2.2, -0.6)    | P<0.001 |
| Hypertensive                    | 38  | -0.6(-2.4, 1.2)     | 0.48 | 40  | 0.5(-0.6, 1.7)      | 0.35 | 38  | -0.4(-2.1, 1.3)     | 0.68    |

| Diastolic Blood Pressure (mmHg) | n   | cG-Cg               |         | n   | cg-Cg               |      | n   | cg-cG               |      |
|---------------------------------|-----|---------------------|---------|-----|---------------------|------|-----|---------------------|------|
|                                 |     | Mean diff. (95% CI) | p       |     | Mean diff. (95% CI) | p    |     | Mean diff. (95% CI) | p    |
| Overall                         | 142 | -1.6(-2.4, -0.9)    | P<0.001 | 144 | -1(-1.8, -0.2)      | 0.01 | 150 | 0.5(-0.2, 1.2)      | 0.17 |
| Male                            | 69  | -1.8(-3, -0.7)      | 0.002   | 71  | -1.4(-2.6, -0.2)    | 0.02 | 75  | 0.3(-0.7, 1.3)      | 0.57 |
| Female                          | 73  | -1.5(-2.4, -0.5)    | 0.003   | 73  | -0.7(-1.8, 0.4)     | 0.19 | 75  | 0.7(-0.3, 1.6)      | 0.16 |
| African American                | 74  | -1.3(-2.2, -0.4)    | 0.006   | 73  | -0.7(-1.6, 0.1)     | 0.10 | 76  | 0.6(-0.3, 1.5)      | 0.19 |
| Non African American            | 68  | -2(-3.2, -0.8)      | 0.001   | 71  | -1.4(-2.7, 0)       | 0.05 | 74  | 0.4(-0.7, 1.4)      | 0.51 |
| Non Hypertensive                | 103 | -1.8(-2.7, -0.9)    | P<0.001 | 105 | -0.9(-1.9, 0)       | 0.04 | 110 | 0.9(0.1, 1.7)       | 0.03 |
| Hypertensive                    | 39  | -1.2(-2.6, 0.2)     | 0.10    | 39  | -1.3(-3, 0.4)       | 0.12 | 40  | -0.6(-2, 0.8)       | 0.40 |

<sup>1</sup> CG = Higher Carbohydrate and Higher Glycemic Index

<sup>2</sup> Cg = Higher Carbohydrate and Lower Glycemic Index

<sup>3</sup> cG = Lower Carbohydrate and Higher Glycemic Index

<sup>4</sup> cg = Lower Carbohydrate and Lower Glycemic Index

**eTable 8. HDL Cholesterol**

Diet Effects:

| HDL Cholesterol (mg/dL) | Baseline |            | CG <sup>1</sup> |            | Cg <sup>2</sup> |            | cG <sup>3</sup> |            | Cg <sup>4</sup> |            |
|-------------------------|----------|------------|-----------------|------------|-----------------|------------|-----------------|------------|-----------------|------------|
|                         | n        | Mean(SD)   | n               | Mean(SD)   | n               | Mean(SD)   | n               | Mean(SD)   | n               | Mean(SD)   |
| Overall                 | 163      | 58.3(16)   | 150             | 56.9(15.1) | 153             | 57.3(17.2) | 151             | 59(17.5)   | 153             | 58.2(15.7) |
| Male                    | 78       | 50.7(13.7) | 69              | 51.5(15.7) | 72              | 50(15.9)   | 74              | 51.4(15.7) | 76              | 51.9(14.9) |
| Female                  | 85       | 65.2(14.7) | 81              | 61.5(13)   | 81              | 63.8(15.7) | 77              | 66.3(16.1) | 77              | 64.4(14)   |
| African American        | 83       | 62.8(16.2) | 77              | 61.6(15.6) | 79              | 62(16.4)   | 77              | 64(16.6)   | 76              | 62.7(15.6) |
| Non African American    | 80       | 53.6(14.4) | 73              | 52(12.9)   | 74              | 52.3(16.6) | 74              | 53.8(17)   | 77              | 53.8(14.6) |
| HDL > 40/50 (m/w)       | 133      | 62.5(14.4) | 125             | 59.8(14.6) | 125             | 60.1(15.4) | 122             | 63.3(16.3) | 124             | 61.6(15.1) |
| HDL < 40/50 (m/w)       | 30       | 39.5(5.8)  | 25              | 42.3(7.3)  | 28              | 44.9(19.5) | 29              | 41.2(9.1)  | 29              | 43.9(8.8)  |

Diet Contrasts: mean difference (99% CI)

| HDL Cholesterol (mg/dL) | n   | cg-CG               |      | n   | Cg-CG               |      | n   | cG-CG               |       |
|-------------------------|-----|---------------------|------|-----|---------------------|------|-----|---------------------|-------|
|                         |     | Mean diff. (99% CI) | p    |     | Mean diff. (99% CI) | p    |     | Mean diff. (99% CI) | p     |
| Overall                 | 140 | 1.7(-0.1, 3.5)      | 0.02 | 149 | 0.7(-1.1, 2.5)      | 0.45 | 138 | 2.6(0.9, 4.3)       | 0.003 |
| Male                    | 67  | 0.9(-1.6, 3.4)      | 0.33 | 69  | -1.1(-4.3, 2.2)     | 0.51 | 65  | 0.3(-1.6, 2.2)      | 0.74  |
| Female                  | 73  | 2.4(-0.3, 5)        | 0.02 | 80  | 2.2(0.3, 4.1)       | 0.03 | 73  | 4.6(1.9, 7.2)       | 0.001 |
| African American        | 70  | 1.2(-1.7, 4.2)      | 0.27 | 77  | 0.5(-1.7, 2.8)      | 0.63 | 71  | 3.1(0.8, 5.3)       | 0.008 |
| Non African American    | 70  | 2.1(-0.1, 4.3)      | 0.01 | 72  | 0.9(-2.1, 3.8)      | 0.57 | 67  | 2.1(-0.6, 4.7)      | 0.12  |
| HDL > 40/50 (m/w)       | 116 | 1.4(-0.7, 3.5)      | 0.08 | 124 | 0.2(-1.4, 1.7)      | 0.85 | 114 | 3.2(1.2, 5.1)       | 0.002 |
| HDL < 40/50 (m/w)       | 24  | 2.9(-0.3, 6.2)      | 0.02 | 25  | 3.3(-4.5, 11.2)     | 0.39 | 24  | -0.4(-3.5, 2.8)     | 0.80  |

| HDL Cholesterol (mg/dL) | n   | cG-Cg               |         | n   | cg-Cg               |      | n   | cg-cG               |      |
|-------------------------|-----|---------------------|---------|-----|---------------------|------|-----|---------------------|------|
|                         |     | Mean diff. (99% CI) | p       |     | Mean diff. (99% CI) | p    |     | Mean diff. (99% CI) | p    |
| Overall                 | 141 | 2(-0.1, 4.1)        | 0.07    | 143 | 1.1(-0.9, 3.1)      | 0.26 | 149 | -0.7(-2.1, 0.6)     | 0.29 |
| Male                    | 68  | 1.6(-1.9, 5)        | 0.36    | 70  | 2.1(-1.1, 5.4)      | 0.18 | 74  | 0.3(-1.3, 1.8)      | 0.73 |
| Female                  | 73  | 2.4(-0.3, 5)        | 0.08    | 73  | 0.2(-2.3, 2.7)      | 0.89 | 75  | -1.7(-4.1, 0.6)     | 0.14 |
| African American        | 73  | 2.5(0.1, 4.9)       | 0.04    | 72  | 0.9(-1.7, 3.6)      | 0.50 | 75  | -1.2(-3.1, 0.7)     | 0.22 |
| Non African American    | 68  | 1.5(-2.2, 5.1)      | 0.42    | 71  | 1.4(-1.7, 4.4)      | 0.38 | 74  | -0.3(-2.4, 1.8)     | 0.76 |
| HDL > 40/50 (m/w)       | 114 | 3.2(1.4, 5.1)       | P<0.001 | 116 | 1.4(-0.4, 3.2)      | 0.12 | 120 | -1.6(-3.2, 0)       | 0.05 |
| HDL < 40/50 (m/w)       | 27  | -3.3(-11.2, 4.6)    | 0.39    | 27  | -0.1(-7.7, 7.5)     | 0.98 | 29  | 2.8(0.1, 5.5)       | 0.05 |

<sup>1</sup> CG = Higher Carbohydrate and Higher Glycemic Index

<sup>2</sup> Cg = Higher Carbohydrate and Lower Glycemic Index

<sup>3</sup> cG = Lower Carbohydrate and Higher Glycemic Index

<sup>4</sup> cg = Lower Carbohydrate and Lower Glycemic Index

**eTable 9. LDL Cholesterol**

Diet Effects:

| LDL Cholesterol (mg/dL) | Baseline |             | CG <sup>1</sup> |             | Cg <sup>2</sup> |             | cG <sup>3</sup> |             | cg <sup>4</sup> |             |
|-------------------------|----------|-------------|-----------------|-------------|-----------------|-------------|-----------------|-------------|-----------------|-------------|
|                         | n        | Mean(SD)    | n               | Mean(SD)    | n               | Mean(SD)    | n               | Mean(SD)    | n               | Mean(SD)    |
| Overall                 | 163      | 153(42.1)   | 150             | 138.6(36.6) | 152             | 146.2(37.2) | 151             | 138(36.1)   | 153             | 138(36.8)   |
| Male                    | 78       | 148.4(43.4) | 69              | 132.8(38.1) | 71              | 143.9(36)   | 74              | 133.4(36.3) | 76              | 133.1(36.1) |
| Female                  | 85       | 157.3(40.6) | 81              | 143.4(34.8) | 81              | 148.2(38.4) | 77              | 142.5(35.6) | 77              | 142.8(37)   |
| African American        | 83       | 152.5(41.2) | 77              | 138(35.8)   | 78              | 142.5(35.9) | 77              | 138.5(33.5) | 76              | 140(37.4)   |
| Non African American    | 80       | 153.6(43.2) | 73              | 139.2(37.7) | 74              | 150.1(38.4) | 74              | 137.5(38.8) | 77              | 136(36.2)   |
| LDL > 130               | 111      | 174.2(32.9) | 103             | 153.5(32.1) | 104             | 161.7(32.5) | 104             | 153.1(30.5) | 106             | 153.5(30.8) |
| LDL < 130               | 52       | 107.8(15.3) | 47              | 105.8(21.7) | 48              | 112.5(21)   | 47              | 104.6(22.7) | 47              | 102.9(22.2) |

Diet Contrasts: mean difference (99% CI)

| LDL Cholesterol (mg/dL) | n   | cg-CG               |      | n   | Cg-CG               |         | n   | cG-CG               |      |
|-------------------------|-----|---------------------|------|-----|---------------------|---------|-----|---------------------|------|
|                         |     | Mean diff. (99% CI) | p    |     | Mean diff. (99% CI) | p       |     | Mean diff. (99% CI) | p    |
| Overall                 | 140 | -0.2(-4.3, 3.8)     | 0.88 | 148 | 7.8(4.2, 11.3)      | P<0.001 | 138 | 0(-3.7, 3.6)        | 0.98 |
| Male                    | 67  | 2.6(-2.9, 8.1)      | 0.21 | 68  | 12.5(7.1, 17.9)     | P<0.001 | 65  | 3.9(-0.8, 8.6)      | 0.10 |
| Female                  | 73  | -2.8(-8.8, 3.1)     | 0.21 | 80  | 3.8(-0.8, 8.3)      | 0.10    | 73  | -3.6(-9.1, 2)       | 0.20 |
| African American        | 70  | -0.3(-6.5, 5.8)     | 0.89 | 76  | 4.5(-0.3, 9.2)      | 0.07    | 71  | -2(-7.4, 3.4)       | 0.46 |
| Non African American    | 70  | -0.1(-5.6, 5.3)     | 0.96 | 72  | 11.2(6.1, 16.4)     | P<0.001 | 67  | 2(-3, 7.1)          | 0.42 |
| LDL > 130               | 98  | 0.8(-4, 5.6)        | 0.65 | 102 | 8.3(3.9, 12.6)      | P<0.001 | 96  | -0.1(-4.8, 4.6)     | 0.97 |
| LDL < 130               | 42  | -2.7(-10.5, 5.1)    | 0.35 | 46  | 6.6(0.5, 12.7)      | 0.04    | 42  | 0.1(-5.8, 6)        | 0.98 |

| LDL Cholesterol (mg/dL) | n   | cG-Cg               |         | n   | cg-Cg               |         | n   | cg-cG               |      |
|-------------------------|-----|---------------------|---------|-----|---------------------|---------|-----|---------------------|------|
|                         |     | Mean diff. (99% CI) | p       |     | Mean diff. (99% CI) | p       |     | Mean diff. (99% CI) | p    |
| Overall                 | 140 | -7.8(-11.7, -4)     | P<0.001 | 142 | -8.3(-11.9, -4.8)   | P<0.001 | 149 | -0.4(-3.3, 2.4)     | 0.77 |
| Male                    | 67  | -7.9(-13.4, -2.5)   | 0.005   | 69  | -9.3(-15.2, -3.5)   | 0.002   | 74  | -0.4(-3.6, 2.8)     | 0.82 |
| Female                  | 73  | -7.8(-13.4, -2.1)   | 0.008   | 73  | -7.4(-11.8, -3)     | 0.001   | 75  | -0.5(-5.2, 4.3)     | 0.85 |
| African American        | 72  | -6.4(-11.6, -1.2)   | 0.02    | 71  | -5.2(-9.9, -0.5)    | 0.03    | 75  | 0.7(-3.3, 4.7)      | 0.72 |
| Non African American    | 68  | -9.3(-15.3, -3.4)   | 0.002   | 71  | -11.4(-16.8, -6)    | P<0.001 | 74  | -1.6(-5.7, 2.5)     | 0.45 |
| LDL > 130               | 97  | -8(-13.1, -2.9)     | 0.002   | 99  | -7.8(-12.4, -3.2)   | 0.001   | 104 | 0.1(-3.6, 3.9)      | 0.95 |
| LDL < 130               | 43  | -7.5(-13.1, -1.8)   | 0.01    | 43  | -9.5(-15.1, -4)     | 0.001   | 45  | -1.7(-5.5, 2.1)     | 0.38 |

<sup>1</sup> CG = Higher Carbohydrate and Higher Glycemic Index

<sup>2</sup> Cg = Higher Carbohydrate and Lower Glycemic Index

<sup>3</sup> cG = Lower Carbohydrate and Higher Glycemic Index

<sup>4</sup> cg = Lower Carbohydrate and Lower Glycemic Index

**eTable 10. Triglycerides**

Diet Effects:

| Triglycerides (mg/dL) | n   | Baseline    |     | CG <sup>1</sup> |     | Cg <sup>2</sup> |     | cG <sup>3</sup> |     | cg <sup>4</sup> |   |
|-----------------------|-----|-------------|-----|-----------------|-----|-----------------|-----|-----------------|-----|-----------------|---|
|                       |     | Mean(SD)    | n   | Mean(SD)        | n   | Mean(SD)        | n   | Mean(SD)        | n   | Mean(SD)        | n |
| Overall               | 163 | 104.6(67.1) | 150 | 110.8(65.7)     | 153 | 107.4(59.2)     | 151 | 90.4(48.1)      | 153 | 86.4(48.1)      |   |
| Male                  | 78  | 120.5(82.5) | 69  | 127.3(80.3)     | 72  | 123.5(69)       | 74  | 100.9(57)       | 76  | 97.5(55.2)      |   |
| Female                | 85  | 90.1(44.6)  | 81  | 96.7(46)        | 81  | 93.2(44.7)      | 77  | 80.4(35.1)      | 77  | 75.4(37.2)      |   |
| African American      | 83  | 83.4(37)    | 77  | 86.8(38.9)      | 79  | 89(44.8)        | 77  | 78.2(41.7)      | 76  | 72.5(38.5)      |   |
| Non African American  | 80  | 126.6(82.7) | 73  | 136(77.9)       | 74  | 127.1(66.3)     | 74  | 103.2(51.2)     | 77  | 100.1(52.8)     |   |
| TG > 150              | 28  | 215.5(87.7) | 26  | 196.7(99.9)     | 27  | 185.3(84.8)     | 24  | 156(71.7)       | 24  | 162.5(66.4)     |   |
| TG < 150              | 135 | 81.6(28)    | 124 | 92.8(36.1)      | 126 | 90.7(34.3)      | 127 | 78(29)          | 129 | 72.2(25.9)      |   |

Diet Contrasts: mean difference (99% CI)

| Triglycerides (mg/dL) | n   | cg-CG               |         |     | Cg-CG               |      |     | cG-CG               |         |  |
|-----------------------|-----|---------------------|---------|-----|---------------------|------|-----|---------------------|---------|--|
|                       |     | Mean diff. (99% CI) | p       | n   | Mean diff. (99% CI) | p    | n   | Mean diff. (99% CI) | p       |  |
| Overall               | 140 | -25(-34.5, -15.5)   | P<0.001 | 149 | -4.7(-10.6, 1.3)    | 0.13 | 138 | -20.3(-27.9, -12.7) | P<0.001 |  |
| Male                  | 67  | -31.2(-47.6, -14.7) | P<0.001 | 69  | -5.3(-16.9, 6.3)    | 0.36 | 65  | -26(-40, -12.1)     | P<0.001 |  |
| Female                | 73  | -19.4(-29.9, -8.8)  | P<0.001 | 80  | -4.1(-9.3, 1.1)     | 0.12 | 73  | -15.1(-22.6, -7.7)  | P<0.001 |  |
| African American      | 70  | -12.3(-17.9, -6.7)  | P<0.001 | 77  | 1.6(-3.7, 7)        | 0.54 | 71  | -7.5(-12.3, -2.8)   | 0.002   |  |
| Non African American  | 70  | -37.7(-55.4, -20.1) | P<0.001 | 72  | -11.4(-22.3, -0.5)  | 0.04 | 67  | -33.8(-48.1, -19.4) | P<0.001 |  |
| TG > 150              | 22  | -50.1(-103.6, 3.3)  | 0.01    | 26  | -11.8(-40.7, 17.2)  | 0.41 | 22  | -50.1(-91.2, -8.9)  | 0.02    |  |
| TG < 150              | 118 | -20.3(-26.5, -14.1) | P<0.001 | 123 | -3.2(-7.4, 1.1)     | 0.15 | 116 | -14.6(-19.3, -9.9)  | P<0.001 |  |

| Triglycerides (mg/dL) | n   | cG-Cg               |         |     | cg-Cg               |         |     | cg-cG               |       |  |
|-----------------------|-----|---------------------|---------|-----|---------------------|---------|-----|---------------------|-------|--|
|                       |     | Mean diff. (99% CI) | p       | n   | Mean diff. (99% CI) | p       | n   | Mean diff. (99% CI) | p     |  |
| Overall               | 141 | -16.8(-22.2, -11.4) | P<0.001 | 143 | -21.1(-27.4, -14.8) | P<0.001 | 149 | -4.5(-8.2, -0.8)    | 0.02  |  |
| Male                  | 68  | -22.8(-31.4, -14.2) | P<0.001 | 70  | -26.4(-37, -15.9)   | P<0.001 | 74  | -3.8(-10.1, 2.6)    | 0.24  |  |
| Female                | 73  | -11.2(-17.9, -4.5)  | 0.001   | 73  | -16(-23.1, -9)      | P<0.001 | 75  | -5.2(-9.2, -1.2)    | 0.01  |  |
| African American      | 73  | -10.3(-15.7, -5)    | P<0.001 | 72  | -15.1(-20.3, -9.9)  | P<0.001 | 75  | -5.7(-9.6, -1.9)    | 0.004 |  |
| Non African American  | 68  | -23.7(-33.3, -14.1) | P<0.001 | 71  | -27.2(-38.6, -15.7) | P<0.001 | 74  | -3.2(-9.7, 3.2)     | 0.32  |  |
| TG > 150              | 23  | -40(-66.3, -13.6)   | 0.005   | 23  | -36.7(-71, -2.5)    | 0.04    | 23  | 1.5(-14.3, 17.3)    | 0.85  |  |
| TG < 150              | 118 | -12.3(-16.2, -8.4)  | P<0.001 | 120 | -18.1(-22.2, -14)   | P<0.001 | 126 | -5.6(-9, -2.1)      | 0.002 |  |

<sup>1</sup> CG = Higher Carbohydrate and Higher Glycemic Index<sup>2</sup> Cg = Higher Carbohydrate and Lower Glycemic Index<sup>3</sup> cG = Lower Carbohydrate and Higher Glycemic Index<sup>4</sup> cg = Lower Carbohydrate and Lower Glycemic Index



**eTable 11. Total Cholesterol**

Diet Effects:

| Total Cholesterol (mg/dL) | n   | Baseline    |     | CG <sup>1</sup> |     | Cg <sup>2</sup> |     | cG <sup>3</sup> |     | cg <sup>4</sup> |   |
|---------------------------|-----|-------------|-----|-----------------|-----|-----------------|-----|-----------------|-----|-----------------|---|
|                           |     | Mean(SD)    | n   | Mean(SD)        | n   | Mean(SD)        | n   | Mean(SD)        | n   | Mean(SD)        | n |
| Overall                   | 163 | 227.1(45)   | 150 | 211.9(41.8)     | 153 | 219.5(41.6)     | 151 | 210.1(42.6)     | 153 | 208.6(41.6)     |   |
| Male                      | 78  | 217.1(47)   | 69  | 203.7(44.5)     | 72  | 212.5(43.1)     | 74  | 200.5(45.2)     | 76  | 200.1(43.6)     |   |
| Female                    | 85  | 236.3(41.3) | 81  | 218.9(38.3)     | 81  | 225.8(39.4)     | 77  | 219.3(38.1)     | 77  | 217.1(38)       |   |
| African American          | 83  | 227(41.9)   | 77  | 210.8(38.4)     | 79  | 216.1(36.6)     | 77  | 212.8(39.1)     | 76  | 211.6(40.4)     |   |
| Non African American      | 80  | 227.3(48.3) | 73  | 213.1(45.4)     | 74  | 223.2(46.2)     | 74  | 207.2(46.1)     | 77  | 205.7(42.9)     |   |
| Chol > 200                | 113 | 248.8(35.6) | 105 | 227.1(35.9)     | 107 | 234.7(37.9)     | 104 | 226(37.2)       | 107 | 224.3(36.6)     |   |
| Chol < 200                | 50  | 178.1(16.2) | 45  | 176.5(32.2)     | 46  | 184.2(25)       | 47  | 174.9(31.7)     | 46  | 172.1(27.2)     |   |

Diet Contrasts: mean difference (95% CI)

| Total Cholesterol (mg/dL) | n   | cg-CG               |      | Cg-CG |                     |         | cG-CG |                     |      |
|---------------------------|-----|---------------------|------|-------|---------------------|---------|-------|---------------------|------|
|                           |     | Mean diff. (95% CI) | p    | n     | Mean diff. (95% CI) | p       | n     | Mean diff. (95% CI) | p    |
| Overall                   | 140 | -2.5(-5.9, 1)       | 0.16 | 149   | 7.9(4.4, 11.3)      | P<0.001 | 138   | -0.5(-4.4, 3.4)     | 0.81 |
| Male                      | 67  | -0.8(-5.8, 4.1)     | 0.74 | 69    | 10.4(5.3, 15.4)     | P<0.001 | 65    | 1.4(-3.8, 6.5)      | 0.60 |
| Female                    | 73  | -3.9(-8.7, 0.9)     | 0.11 | 80    | 5.7(1, 10.4)        | 0.02    | 73    | -2.1(-7.9, 3.7)     | 0.48 |
| African American          | 70  | -0.7(-5.9, 4.6)     | 0.80 | 77    | 5.2(0.2, 10.2)      | 0.04    | 71    | 0.5(-5.3, 6.3)      | 0.87 |
| Non African American      | 70  | -4.3(-8.8, 0.2)     | 0.06 | 72    | 10.7(5.9, 15.4)     | P<0.001 | 67    | -1.5(-6.8, 3.8)     | 0.58 |
| Chol > 200                | 99  | -1.9(-6.1, 2.3)     | 0.37 | 105   | 8.1(3.8, 12.5)      | P<0.001 | 96    | -0.7(-5.9, 4.6)     | 0.80 |
| Chol < 200                | 41  | -3.7(-9.7, 2.3)     | 0.22 | 44    | 7.2(1.7, 12.6)      | 0.01    | 42    | -0.1(-5, 4.9)       | 0.98 |

| Total Cholesterol (mg/dL) | n   | cG-Cg               |         | cg-cG |                     |         |     |                     |      |
|---------------------------|-----|---------------------|---------|-------|---------------------|---------|-----|---------------------|------|
|                           |     | Mean diff. (95% CI) | p       | n     | Mean diff. (95% CI) | p       | n   | Mean diff. (95% CI) | p    |
| Overall                   | 141 | -8.7(-12.8, -4.7)   | P<0.001 | 143   | -10.7(-14.2, -7.3)  | P<0.001 | 149 | -1.9(-5.1, 1.2)     | 0.23 |
| Male                      | 68  | -9.1(-14.8, -3.4)   | 0.002   | 70    | -10.7(-16.2, -5.1)  | P<0.001 | 74  | -0.9(-4.4, 2.5)     | 0.60 |
| Female                    | 73  | -8.4(-14.3, -2.6)   | 0.005   | 73    | -10.8(-15.1, -6.5)  | P<0.001 | 75  | -2.9(-8.3, 2.5)     | 0.28 |
| African American          | 73  | -5.2(-10.4, 0.1)    | 0.05    | 72    | -6.5(-11.4, -1.7)   | 0.009   | 75  | -1.8(-5.9, 2.2)     | 0.37 |
| Non African American      | 68  | -12.6(-18.8, -6.4)  | P<0.001 | 71    | -15(-19.8, -10.2)   | P<0.001 | 74  | -2(-7, 3)           | 0.42 |
| Chol > 200                | 98  | -9.1(-14.1, -4.1)   | P<0.001 | 101   | -10.7(-14.9, -6.5)  | P<0.001 | 104 | -1.6(-5.8, 2.5)     | 0.44 |
| Chol < 200                | 43  | -7.9(-14.9, -0.9)   | 0.03    | 42    | -10.9(-17, -4.7)    | P<0.001 | 45  | -2.6(-7.2, 2)       | 0.25 |

<sup>1</sup> CG = Higher Carbohydrate and Higher Glycemic Index

<sup>2</sup> Cg = Higher Carbohydrate and Lower Glycemic Index

<sup>3</sup> cG = Lower Carbohydrate and Higher Glycemic Index

<sup>4</sup> cg = Lower Carbohydrate and Lower Glycemic Index

**eTable 12. Non-HDL Cholesterol**

Diet Effects:

| Non-HDL Cholesterol (mg/dL) | n   | Baseline    |     | CG <sup>1</sup> |     | Cg <sup>2</sup> |     | cG <sup>3</sup> |     | cg <sup>4</sup> |   |
|-----------------------------|-----|-------------|-----|-----------------|-----|-----------------|-----|-----------------|-----|-----------------|---|
|                             |     | Mean(SD)    | n   | Mean(SD)        | n   | Mean(SD)        | n   | Mean(SD)        | n   | Mean(SD)        | n |
| Overall                     | 163 | 168.8(46.4) | 150 | 155(41.5)       | 153 | 162.2(41.1)     | 151 | 151.1(41.2)     | 153 | 150.4(41.1)     |   |
| Male                        | 78  | 166.4(48.7) | 69  | 152.2(44.4)     | 72  | 162.5(40.2)     | 74  | 149.1(44.4)     | 76  | 148.2(42.4)     |   |
| Female                      | 85  | 171(44.3)   | 81  | 157.4(39.1)     | 81  | 162(42.1)       | 77  | 152.9(38.1)     | 77  | 152.6(39.9)     |   |
| African American            | 83  | 164.2(43.7) | 77  | 149.2(38)       | 79  | 154.1(37.5)     | 77  | 148.8(36.9)     | 76  | 148.9(39.9)     |   |
| Non African American        | 80  | 173.7(48.8) | 73  | 161.1(44.4)     | 74  | 170.9(43.1)     | 74  | 153.4(45.4)     | 77  | 151.9(42.4)     |   |

Diet Contrasts: mean difference (95% CI)

| Non-HDL Cholesterol (mg/dL) | n   | cg-CG               |       | n   | Cg-CG               |         | n   | cG-CG               |      | p |
|-----------------------------|-----|---------------------|-------|-----|---------------------|---------|-----|---------------------|------|---|
|                             |     | Mean diff. (95% CI) | p     |     | Mean diff. (95% CI) | p       |     | Mean diff. (95% CI) | p    |   |
| Overall                     | 140 | -4.1(-7.4, -0.9)    | 0.01  | 149 | 7.2(3.7, 10.6)      | P<0.001 | 138 | -3(-6.8, 0.7)       | 0.11 |   |
| Male                        | 67  | -1.8(-6.6, 3)       | 0.46  | 69  | 11.4(6.2, 16.6)     | P<0.001 | 65  | 1(-3.9, 5.9)        | 0.67 |   |
| Female                      | 73  | -6.3(-10.8, -1.8)   | 0.007 | 80  | 3.5(-1.1, 8)        | 0.13    | 73  | -6.7(-12.3, -1.1)   | 0.02 |   |
| African American            | 70  | -1.9(-6.7, 2.9)     | 0.44  | 77  | 4.7(-0.1, 9.5)      | 0.06    | 71  | -2.6(-8.1, 3)       | 0.36 |   |
| Non African American        | 70  | -6.4(-10.9, -1.9)   | 0.006 | 72  | 9.8(4.8, 14.8)      | P<0.001 | 67  | -3.5(-8.7, 1.6)     | 0.18 |   |

| Non-HDL Cholesterol (mg/dL) | n   | cG-Cg               |         | n   | cg-Cg               |         | n   | cg-cG               |      | p |
|-----------------------------|-----|---------------------|---------|-----|---------------------|---------|-----|---------------------|------|---|
|                             |     | Mean diff. (95% CI) | p       |     | Mean diff. (95% CI) | p       |     | Mean diff. (95% CI) | p    |   |
| Overall                     | 141 | -10.7(-14.8, -6.7)  | P<0.001 | 143 | -11.9(-15.2, -8.5)  | P<0.001 | 149 | -1.2(-4.2, 1.8)     | 0.44 |   |
| Male                        | 68  | -10.7(-16.3, -5.1)  | P<0.001 | 70  | -12.8(-18, -7.6)    | P<0.001 | 74  | -1.2(-4.5, 2.1)     | 0.48 |   |
| Female                      | 73  | -10.8(-16.7, -4.9)  | P<0.001 | 73  | -11(-15.3, -6.6)    | P<0.001 | 75  | -1.2(-6.3, 3.9)     | 0.65 |   |
| African American            | 73  | -7.6(-12.6, -2.6)   | 0.003   | 72  | -7.4(-11.8, -3.1)   | 0.001   | 75  | -0.7(-4.8, 3.5)     | 0.75 |   |
| Non African American        | 68  | -14.1(-20.6, -7.6)  | P<0.001 | 71  | -16.4(-21.3, -11.4) | P<0.001 | 74  | -1.7(-6.2, 2.8)     | 0.46 |   |

<sup>1</sup> CG = Higher Carbohydrate and Higher Glycemic Index

<sup>2</sup> Cg = Higher Carbohydrate and Lower Glycemic Index

<sup>3</sup> cG = Lower Carbohydrate and Higher Glycemic Index

<sup>4</sup> cg = Lower Carbohydrate and Lower Glycemic Index

**eTable 13. Fasting Glucose**

Diet Effects:

| Glucose (mg/dL)      | n   | Baseline    |     | CG <sup>1</sup> |     | Cg <sup>2</sup> |     | cG <sup>3</sup> |     | cg <sup>4</sup> |   |
|----------------------|-----|-------------|-----|-----------------|-----|-----------------|-----|-----------------|-----|-----------------|---|
|                      |     | Mean(SD)    | n   | Mean(SD)        | n   | Mean(SD)        | n   | Mean(SD)        | n   | Mean(SD)        | n |
| Overall              | 163 | 97.3(13.6)  | 150 | 94.2(13.4)      | 153 | 96(14.5)        | 151 | 94.8(12)        | 153 | 97.4(13.7)      |   |
| Male                 | 78  | 98.7(11.9)  | 69  | 96.4(15.4)      | 72  | 98.1(12.9)      | 74  | 95.8(12.4)      | 76  | 98.9(13)        |   |
| Female               | 85  | 96(14.9)    | 81  | 92.2(11.2)      | 81  | 94.2(15.7)      | 77  | 93.9(11.6)      | 77  | 96(14.3)        |   |
| African American     | 83  | 96.9(13)    | 77  | 91.9(10.9)      | 79  | 94.7(14.3)      | 77  | 94.5(10.1)      | 76  | 95.9(13.5)      |   |
| Non African American | 80  | 97.6(14.2)  | 73  | 96.5(15.3)      | 74  | 97.4(14.7)      | 74  | 95.1(13.8)      | 77  | 99(13.7)        |   |
| BMI > 30             | 92  | 98.3(13.3)  | 85  | 95.4(14.8)      | 87  | 97(15)          | 85  | 95.3(12.4)      | 86  | 97.5(13.7)      |   |
| BMI 25-29.9          | 71  | 95.9(13.9)  | 65  | 92.5(11.2)      | 66  | 94.7(13.8)      | 66  | 94.2(11.5)      | 67  | 97.3(13.7)      |   |
| Met. Syndrome        | 33  | 107.1(16.1) | 28  | 105.6(20.7)     | 29  | 106.2(20.8)     | 31  | 104(15)         | 31  | 107.1(16.4)     |   |
| No Met. Syndrome     | 130 | 94.8(11.7)  | 122 | 91.5(9.3)       | 124 | 93.6(11.5)      | 120 | 92.4(9.9)       | 122 | 95(11.8)        |   |

Diet Contrasts: mean difference (95% CI)

| Glucose (mg/dL)      | n   | cg-CG               |       |     | Cg-CG               |      |     | cG-CG               |      |  |
|----------------------|-----|---------------------|-------|-----|---------------------|------|-----|---------------------|------|--|
|                      |     | Mean diff. (95% CI) | p     | n   | Mean diff. (95% CI) | p    | n   | Mean diff. (95% CI) | p    |  |
| Overall              | 140 | 2.2(0.2, 4.3)       | 0.03  | 149 | 1.8(-0.3, 3.9)      | 0.09 | 138 | 0.7(-1.3, 2.6)      | 0.49 |  |
| Male                 | 67  | 1.1(-2.2, 4.4)      | 0.50  | 69  | 1.5(-2, 4.9)        | 0.4  | 65  | -0.8(-4.3, 2.8)     | 0.67 |  |
| Female               | 73  | 3.2(0.6, 5.8)       | 0.02  | 80  | 2.1(-0.5, 4.6)      | 0.11 | 73  | 2(0.1, 3.8)         | 0.04 |  |
| African American     | 70  | 3.2(0.2, 6.2)       | 0.03  | 77  | 2.9(0.3, 5.4)       | 0.03 | 71  | 2.9(0.6, 5.2)       | 0.01 |  |
| Non African American | 70  | 1.2(-1.7, 4.1)      | 0.40  | 72  | 0.6(-2.8, 4)        | 0.73 | 67  | -1.7(-4.8, 1.5)     | 0.29 |  |
| BMI > 30             | 79  | 0.9(-2, 3.9)        | 0.54  | 85  | 1.3(-1.9, 4.5)      | 0.43 | 78  | -0.6(-3.7, 2.5)     | 0.69 |  |
| BMI 25-29.9          | 61  | 3.9(1.1, 6.7)       | 0.007 | 64  | 2.4(0, 4.8)         | 0.05 | 60  | 2.4(0.4, 4.3)       | 0.02 |  |
| Met. Syndrome        | 26  | -0.5(-8, 7.1)       | 0.90  | 28  | 0.1(-8.1, 8.3)      | 0.98 | 26  | -3.4(-11.4, 4.6)    | 0.39 |  |
| No Met. Syndrome     | 114 | 2.8(0.9, 4.7)       | 0.004 | 121 | 2.2(0.3, 4)         | 0.02 | 112 | 1.6(0, 3.2)         | 0.04 |  |

| Glucose (mg/dL)      | n   | cG-Cg               |      |     | cg-Cg               |      |     | cg-cG               |       |  |
|----------------------|-----|---------------------|------|-----|---------------------|------|-----|---------------------|-------|--|
|                      |     | Mean diff. (95% CI) | p    | n   | Mean diff. (95% CI) | p    | n   | Mean diff. (95% CI) | p     |  |
| Overall              | 141 | -1.1(-3, 0.8)       | 0.24 | 143 | 0.8(-1, 2.6)        | 0.39 | 149 | 2.5(0.7, 4.3)       | 0.007 |  |
| Male                 | 68  | -2.4(-5.4, 0.6)     | 0.12 | 70  | -0.2(-2.8, 2.5)     | 0.91 | 74  | 3.1(0.4, 5.9)       | 0.03  |  |
| Female               | 73  | 0(-2.3, 2.4)        | 0.98 | 73  | 1.7(-0.9, 4.3)      | 0.19 | 75  | 1.9(-0.5, 4.3)      | 0.12  |  |
| African American     | 73  | 0.1(-2.7, 2.8)      | 0.95 | 72  | 0.7(-2.2, 3.6)      | 0.62 | 75  | 1.2(-1.4, 3.9)      | 0.36  |  |
| Non African American | 68  | -2.4(-5.1, 0.2)     | 0.07 | 71  | 0.9(-1.4, 3.2)      | 0.45 | 74  | 3.8(1.3, 6.3)       | 0.003 |  |
| BMI > 30             | 80  | -1.7(-4.4, 1)       | 0.21 | 81  | -0.2(-2.6, 2.2)     | 0.89 | 85  | 2.3(0.2, 4.4)       | 0.03  |  |
| BMI 25-29.9          | 61  | -0.4(-3, 2.3)       | 0.78 | 62  | 2.1(-0.9, 5)        | 0.16 | 64  | 2.8(-0.4, 6)        | 0.09  |  |
| Met. Syndrome        | 27  | -3.9(-8.6, 0.9)     | 0.10 | 27  | -1.4(-6.1, 3.3)     | 0.54 | 31  | 3.1(-0.9, 7.1)      | 0.13  |  |
| No Met. Syndrome     | 114 | -0.5(-2.5, 1.6)     | 0.64 | 116 | 1.3(-0.7, 3.3)      | 0.2  | 118 | 2.4(0.3, 4.4)       | 0.03  |  |

<sup>1</sup> CG = Higher Carbohydrate and Higher Glycemic Index

<sup>2</sup> Cg = Higher Carbohydrate and Lower Glycemic Index

<sup>3</sup> cG = Lower Carbohydrate and Higher Glycemic Index

<sup>4</sup> cg = Lower Carbohydrate and Lower Glycemic Index

**eTable 14. Fasting Insulin**

Diet Effects:

| Insulin (microunits per ml) | n   | Baseline  |     | CG <sup>1</sup> |     | Cg <sup>2</sup> |     | cG <sup>3</sup> |     | cg <sup>4</sup> |   |
|-----------------------------|-----|-----------|-----|-----------------|-----|-----------------|-----|-----------------|-----|-----------------|---|
|                             |     | Mean(SD)  | n   | Mean(SD)        | n   | Mean(SD)        | n   | Mean(SD)        | n   | Mean(SD)        | n |
| Overall                     | 163 | 7.7(5.8)  | 150 | 6.7(5)          | 153 | 7.8(6.9)        | 151 | 7.1(5.6)        | 153 | 7.4(7)          |   |
| Male                        | 78  | 8.2(6.7)  | 69  | 6.9(5.6)        | 72  | 8.1(6)          | 74  | 6.8(5)          | 76  | 8.1(8.4)        |   |
| Female                      | 85  | 7.2(4.8)  | 81  | 6.5(4.4)        | 81  | 7.5(7.6)        | 77  | 7.3(6.1)        | 77  | 6.7(5.2)        |   |
| African American            | 83  | 7.4(5.2)  | 77  | 6.2(4.3)        | 79  | 8.3(8.3)        | 77  | 7.1(5.2)        | 76  | 7.5(8.1)        |   |
| Non African American        | 80  | 8(6.4)    | 73  | 7.2(5.6)        | 74  | 7.3(4.9)        | 74  | 7.1(6.1)        | 77  | 7.3(5.7)        |   |
| BMI > 30                    | 92  | 8.6(6.6)  | 85  | 7.3(5.5)        | 87  | 8.9(7.6)        | 85  | 8.2(5.9)        | 86  | 8.7(8.4)        |   |
| BMI 25-29.9                 | 71  | 6.4(4.2)  | 65  | 5.9(4.2)        | 66  | 6.4(5.5)        | 66  | 5.6(4.8)        | 67  | 5.8(4.1)        |   |
| Met. Syndrome               | 33  | 10.9(6.9) | 28  | 9.6(5.5)        | 29  | 9.7(7.2)        | 31  | 10.9(7.8)       | 31  | 9.8(6.3)        |   |
| No Met. Syndrome            | 130 | 6.9(5.2)  | 122 | 6(4.6)          | 124 | 7.3(6.7)        | 120 | 6.1(4.4)        | 122 | 6.8(7)          |   |

Diet Contrasts: mean difference (95% CI)

| Insulin (microunits per ml) | n   | cg-CG               |      | n   | Cg-CG               |      | n   | cG-CG               |      |
|-----------------------------|-----|---------------------|------|-----|---------------------|------|-----|---------------------|------|
|                             |     | Mean diff. (95% CI) | p    |     | Mean diff. (95% CI) | p    |     | Mean diff. (95% CI) | p    |
| Overall                     | 140 | 0.4(-0.5, 1.3)      | 0.41 | 149 | 1(0, 2)             | 0.05 | 138 | 0.3(-0.5, 1.1)      | 0.49 |
| Male                        | 67  | 1(-0.6, 2.5)        | 0.24 | 69  | 1.1(0, 2.2)         | 0.05 | 65  | -0.2(-1.3, 0.9)     | 0.71 |
| Female                      | 73  | -0.1(-1.2, 0.9)     | 0.81 | 80  | 0.9(-0.7, 2.5)      | 0.26 | 73  | 0.7(-0.5, 1.9)      | 0.24 |
| African American            | 70  | 1(-0.6, 2.6)        | 0.24 | 77  | 2.1(0.5, 3.7)       | 0.01 | 71  | 0.7(-0.4, 1.7)      | 0.22 |
| Non African American        | 70  | -0.2(-1.2, 0.8)     | 0.71 | 72  | -0.2(-1.2, 0.9)     | 0.77 | 67  | -0.1(-1.4, 1.2)     | 0.87 |
| BMI > 30                    | 79  | 1.1(-0.5, 2.6)      | 0.18 | 85  | 1.5(-0.1, 3)        | 0.07 | 78  | 0.7(-0.6, 2)        | 0.29 |
| BMI 25-29.9                 | 61  | -0.5(-1.3, 0.3)     | 0.21 | 64  | 0.4(-0.5, 1.3)      | 0.39 | 60  | -0.2(-1.1, 0.7)     | 0.59 |
| Met. Syndrome               | 26  | -0.3(-2.6, 2.1)     | 0.81 | 28  | -0.2(-2.3, 1.9)     | 0.86 | 26  | 1.3(-1.1, 3.7)      | 0.27 |
| No Met. Syndrome            | 114 | 0.5(-0.5, 1.6)      | 0.30 | 121 | 1.3(0.2, 2.4)       | 0.03 | 112 | 0.1(-0.8, 0.9)      | 0.91 |

| Insulin (microunits per ml) | n   | cG-Cg               |      | n   | cg-Cg               |        | n   | cg-cG               |      |
|-----------------------------|-----|---------------------|------|-----|---------------------|--------|-----|---------------------|------|
|                             |     | Mean diff. (95% CI) | p    |     | Mean diff. (95% CI) | p      |     | Mean diff. (95% CI) | p    |
| Overall                     | 141 | -0.8(-1.9, 0.2)     | 0.13 | 143 | -0.6(-1.7, 0.6)     | 0.33   | 149 | 0.3(-0.7, 1.3)      | 0.54 |
| Male                        | 68  | -1.2(-2.1, -0.2)    | 0.02 | 70  | 0(-1.4, 1.4)        | P>0.99 | 74  | 1.3(-0.3, 2.9)      | 0.10 |
| Female                      | 73  | -0.5(-2.3, 1.4)     | 0.62 | 73  | -1.1(-3, 0.8)       | 0.24   | 75  | -0.7(-1.9, 0.5)     | 0.25 |
| African American            | 73  | -1.5(-3.3, 0.3)     | 0.11 | 72  | -1.1(-3.3, 1.1)     | 0.33   | 75  | 0.4(-1.3, 2.1)      | 0.62 |
| Non African American        | 68  | -0.1(-1.1, 0.9)     | 0.85 | 71  | -0.1(-0.9, 0.8)     | 0.89   | 74  | 0.2(-0.9, 1.3)      | 0.71 |
| BMI > 30                    | 80  | -0.8(-2.6, 0.9)     | 0.34 | 81  | -0.4(-2.3, 1.5)     | 0.68   | 85  | 0.5(-1.1, 2.1)      | 0.56 |
| BMI 25-29.9                 | 61  | -0.8(-1.6, 0.1)     | 0.07 | 62  | -0.8(-1.9, 0.3)     | 0.14   | 64  | 0.1(-0.9, 1.1)      | 0.82 |
| Met. Syndrome               | 27  | 1.4(-0.9, 3.8)      | 0.22 | 27  | -0.1(-3.1, 2.8)     | 0.94   | 31  | -1.1(-3.4, 1.1)     | 0.31 |
| No Met. Syndrome            | 114 | -1.3(-2.5, -0.2)    | 0.02 | 116 | -0.7(-2, 0.6)       | 0.30   | 118 | 0.7(-0.4, 1.8)      | 0.22 |

<sup>1</sup> CG = Higher Carbohydrate and Higher Glycemic Index<sup>2</sup> Cg = Higher Carbohydrate and Lower Glycemic Index<sup>3</sup> cG = Lower Carbohydrate and Higher Glycemic Index<sup>4</sup> cg = Lower Carbohydrate and Lower Glycemic Index

© 2014 American Medical Association. All rights reserved.

**eTable 15. HOMA(Homeostatic model assessment of insulin resistance)**

Diet Effects:

| HOMA                 | n   | Baseline |     | CG <sup>1</sup> |     | Cg <sup>2</sup> |     | cG <sup>3</sup> |     | Cg <sup>4</sup> |   |
|----------------------|-----|----------|-----|-----------------|-----|-----------------|-----|-----------------|-----|-----------------|---|
|                      |     | Mean(SD) | n   | Mean(SD)        | n   | Mean(SD)        | n   | Mean(SD)        | n   | Mean(SD)        | n |
| Overall              | 163 | 1.9(1.6) | 150 | 1.6(1.4)        | 153 | 1.9(1.9)        | 151 | 1.7(1.5)        | 153 | 1.9(1.9)        |   |
| Male                 | 78  | 2.1(1.9) | 69  | 1.7(1.6)        | 72  | 2(1.5)          | 74  | 1.7(1.3)        | 76  | 2(2.2)          |   |
| Female               | 85  | 1.8(1.3) | 81  | 1.5(1.1)        | 81  | 1.9(2.2)        | 77  | 1.8(1.7)        | 77  | 1.7(1.5)        |   |
| African American     | 83  | 1.8(1.4) | 77  | 1.5(1.1)        | 79  | 2(2.4)          | 77  | 1.7(1.4)        | 76  | 1.9(2.2)        |   |
| Non African American | 80  | 2(1.8)   | 73  | 1.8(1.6)        | 74  | 1.8(1.3)        | 74  | 1.8(1.6)        | 77  | 1.8(1.5)        |   |
| BMI > 30             | 92  | 2.2(1.9) | 85  | 1.8(1.5)        | 87  | 2.2(1.8)        | 85  | 2(1.5)          | 86  | 2.2(2.2)        |   |
| BMI 25-29.9          | 71  | 1.6(1.1) | 65  | 1.4(1.1)        | 66  | 1.6(2)          | 66  | 1.4(1.4)        | 67  | 1.5(1.2)        |   |
| Met. Syndrome        | 33  | 2.9(2)   | 28  | 2.6(1.8)        | 29  | 2.7(2.8)        | 31  | 2.9(2.2)        | 31  | 2.6(1.9)        |   |
| No Met. Syndrome     | 130 | 1.7(1.4) | 122 | 1.4(1.2)        | 124 | 1.7(1.6)        | 120 | 1.4(1.1)        | 122 | 1.7(1.8)        |   |

Diet Contrasts: mean difference (95% CI)

| HOMA                 | n   | cg-CG               |      |  | n   | Cg-CG               |       |  | n   | cG-CG               |      |  |
|----------------------|-----|---------------------|------|--|-----|---------------------|-------|--|-----|---------------------|------|--|
|                      |     | Mean diff. (95% CI) | p    |  |     | Mean diff. (95% CI) | p     |  |     | Mean diff. (95% CI) | p    |  |
| Overall              | 140 | 0.1(-0.1, 0.4)      | 0.35 |  | 149 | 0.3(0, 0.6)         | 0.04  |  | 138 | 0.1(-0.1, 0.3)      | 0.47 |  |
| Male                 | 67  | 0.2(-0.2, 0.6)      | 0.33 |  | 69  | 0.3(-0.1, 0.6)      | 0.12  |  | 65  | -0.1(-0.4, 0.2)     | 0.51 |  |
| Female               | 73  | 0(-0.3, 0.3)        | 0.79 |  | 80  | 0.3(-0.1, 0.7)      | 0.16  |  | 73  | 0.2(-0.1, 0.6)      | 0.15 |  |
| African American     | 70  | 0.3(-0.1, 0.7)      | 0.19 |  | 77  | 0.6(0.1, 1)         | 0.009 |  | 71  | 0.2(-0.1, 0.5)      | 0.15 |  |
| Non African American | 70  | 0(-0.3, 0.2)        | 0.76 |  | 72  | 0(-0.4, 0.3)        | 0.79  |  | 67  | -0.1(-0.4, 0.3)     | 0.76 |  |
| BMI > 30             | 79  | 0.3(-0.2, 0.7)      | 0.22 |  | 85  | 0.4(0, 0.8)         | 0.08  |  | 78  | 0.1(-0.2, 0.5)      | 0.39 |  |
| BMI 25-29.9          | 61  | -0.1(-0.3, 0.1)     | 0.52 |  | 64  | 0.2(-0.2, 0.6)      | 0.29  |  | 60  | 0(-0.3, 0.2)        | 0.95 |  |
| Met. Syndrome        | 26  | -0.1(-0.9, 0.7)     | 0.78 |  | 28  | 0(-0.9, 1)          | 0.92  |  | 26  | 0.2(-0.5, 1)        | 0.55 |  |
| No Met. Syndrome     | 114 | 0.2(-0.1, 0.4)      | 0.19 |  | 121 | 0.3(0.1, 0.6)       | 0.01  |  | 112 | 0(-0.2, 0.3)        | 0.67 |  |

| HOMA                 | n   | cG-Cg               |      |  | n   | cg-Cg               |      |  | n   | cg-cG               |      |  |
|----------------------|-----|---------------------|------|--|-----|---------------------|------|--|-----|---------------------|------|--|
|                      |     | Mean diff. (95% CI) | p    |  |     | Mean diff. (95% CI) | p    |  |     | Mean diff. (95% CI) | p    |  |
| Overall              | 141 | -0.2(-0.5, 0)       | 0.10 |  | 143 | -0.1(-0.5, 0.2)     | 0.37 |  | 149 | 0.1(-0.1, 0.4)      | 0.38 |  |
| Male                 | 68  | -0.3(-0.6, -0.1)    | 0.01 |  | 70  | 0(-0.4, 0.4)        | 0.99 |  | 74  | 0.4(0, 0.8)         | 0.08 |  |
| Female               | 73  | -0.1(-0.6, 0.3)     | 0.55 |  | 73  | -0.3(-0.8, 0.2)     | 0.29 |  | 75  | -0.1(-0.5, 0.2)     | 0.40 |  |
| African American     | 73  | -0.4(-0.8, 0.1)     | 0.09 |  | 72  | -0.3(-0.9, 0.3)     | 0.35 |  | 75  | 0.1(-0.3, 0.6)      | 0.54 |  |
| Non African American | 68  | 0(-0.3, 0.2)        | 0.73 |  | 71  | 0(-0.2, 0.2)        | 0.96 |  | 74  | 0.1(-0.2, 0.4)      | 0.51 |  |
| BMI > 30             | 80  | -0.2(-0.6, 0.2)     | 0.32 |  | 81  | -0.1(-0.6, 0.4)     | 0.75 |  | 85  | 0.2(-0.2, 0.6)      | 0.43 |  |
| BMI 25-29.9          | 61  | -0.2(-0.5, 0.1)     | 0.10 |  | 62  | -0.2(-0.6, 0.2)     | 0.25 |  | 64  | 0.1(-0.2, 0.4)      | 0.69 |  |
| Met. Syndrome        | 27  | 0.2(-0.6, 1)        | 0.68 |  | 27  | -0.2(-1.3, 0.9)     | 0.75 |  | 31  | -0.2(-0.9, 0.4)     | 0.50 |  |
| No Met. Syndrome     | 114 | -0.3(-0.6, 0)       | 0.02 |  | 116 | -0.1(-0.5, 0.2)     | 0.38 |  | 118 | 0.2(-0.1, 0.5)      | 0.16 |  |

<sup>1</sup> CG = Higher Carbohydrate and Higher Glycemic Index

<sup>2</sup> Cg = Higher Carbohydrate and Lower Glycemic Index

<sup>3</sup> cG = Lower Carbohydrate and Higher Glycemic Index

<sup>4</sup> cg = Lower Carbohydrate and Lower Glycemic Index

**eTable 16. Insulin sensitivity determined from glucose and insulin levels during oral glucose tolerance testing by the method of Matsuda and DeFronzo**

Diet Effects:

| Matsuda Index        | Baseline |          | CG <sup>1</sup> |           | Cg <sup>2</sup> |          | cG <sup>3</sup> |          | cg <sup>4</sup> |           |
|----------------------|----------|----------|-----------------|-----------|-----------------|----------|-----------------|----------|-----------------|-----------|
|                      | n        | Mean(SD) | n               | Mean(SD)  | n               | Mean(SD) | n               | Mean(SD) | n               | Mean(SD)  |
| Overall              | 162      | 7.3(5.8) | 147             | 8.9(9.5)  | 153             | 7(6.4)   | 151             | 7.9(7.4) | 151             | 8.1(10.3) |
| Male                 | 78       | 7.1(5.9) | 69              | 9.5(10.9) | 72              | 7.3(8)   | 74              | 8(7)     | 75              | 8.9(13.8) |
| Female               | 84       | 7.4(5.8) | 78              | 8.4(8.1)  | 81              | 6.8(4.6) | 77              | 7.7(7.8) | 76              | 7.3(4.9)  |
| African American     | 83       | 7.4(6.4) | 75              | 8.8(8.9)  | 79              | 6.9(7.2) | 77              | 7.9(8.7) | 75              | 7.7(8.3)  |
| Non African American | 79       | 7.2(5.1) | 72              | 9(10.1)   | 74              | 7.2(5.5) | 74              | 7.8(5.7) | 76              | 8.4(12.1) |
| BMI > 30             | 91       | 6.8(5.4) | 84              | 8.5(8.7)  | 87              | 6.2(4.8) | 85              | 7.5(8.1) | 85              | 7.8(11.4) |
| BMI 25-29.9          | 71       | 7.9(6.3) | 63              | 9.5(10.6) | 66              | 8.1(8.1) | 66              | 8.4(6.3) | 66              | 8.3(8.8)  |
| Met. Syndrome        | 33       | 4.2(2.6) | 27              | 5.5(6.5)  | 29              | 4.5(3)   | 31              | 4.5(3.2) | 31              | 4(2.2)    |
| No Met. Syndrome     | 129      | 8.1(6.1) | 120             | 9.7(9.9)  | 124             | 7.6(6.9) | 120             | 8.7(7.9) | 120             | 9.1(11.3) |

Diet Contrasts: mean difference (99% CI)

| Matsuda Index        | n   | cg-CG               |      | n   | Cg-CG               |       | n   | cG-CG               |      |
|----------------------|-----|---------------------|------|-----|---------------------|-------|-----|---------------------|------|
|                      |     | Mean diff. (99% CI) | p    |     | Mean diff. (99% CI) | p     |     | Mean diff. (99% CI) | p    |
| Overall              | 136 | -0.8(-3.6, 2.1)     | 0.49 | 146 | -1.8(-2.9, -0.7)    | 0.002 | 135 | -1(-2.6, 0.5)       | 0.19 |
| Male                 | 67  | -0.4(-5.6, 4.8)     | 0.84 | 69  | -2.1(-3.6, -0.6)    | 0.01  | 65  | -1.4(-3.7, 0.8)     | 0.22 |
| Female               | 69  | -1.1(-3.7, 1.5)     | 0.26 | 77  | -1.5(-3.2, 0.1)     | 0.07  | 70  | -0.7(-2.9, 1.5)     | 0.53 |
| African American     | 67  | -1(-4.2, 2.1)       | 0.38 | 75  | -2(-3.5, -0.5)      | 0.01  | 69  | -0.8(-2.8, 1.1)     | 0.40 |
| Non African American | 69  | -0.5(-5.2, 4.3)     | 0.80 | 71  | -1.6(-3.3, 0.1)     | 0.07  | 66  | -1.3(-3.8, 1.2)     | 0.32 |
| BMI > 30             | 77  | -0.5(-4.6, 3.6)     | 0.75 | 84  | -2.2(-3.9, -0.6)    | 0.01  | 77  | -1(-3.3, 1.3)       | 0.39 |
| BMI 25-29.9          | 59  | -1.1(-5, 2.8)       | 0.46 | 62  | -1.2(-2.6, 0.2)     | 0.09  | 58  | -1.1(-3.2, 1)       | 0.30 |
| Met. Syndrome        | 25  | -1.4(-4.9, 2.2)     | 0.30 | 27  | -0.8(-2.7, 1)       | 0.36  | 25  | -0.9(-3.4, 1.5)     | 0.45 |
| No Met. Syndrome     | 111 | -0.6(-4, 2.8)       | 0.63 | 119 | -2(-3.3, -0.7)      | 0.003 | 110 | -1.1(-2.9, 0.8)     | 0.25 |

| Matsuda Index        | n   | cG-Cg               |      | n   | cg-Cg               |      | n   | cg-cG               |      |
|----------------------|-----|---------------------|------|-----|---------------------|------|-----|---------------------|------|
|                      |     | Mean diff. (99% CI) | p    |     | Mean diff. (99% CI) | p    |     | Mean diff. (99% CI) | p    |
| Overall              | 141 | 0.9(-0.2, 1.9)      | 0.10 | 142 | 1.1(-0.7, 2.9)      | 0.24 | 147 | 0.3(-1.6, 2.1)      | 0.78 |
| Male                 | 68  | 0.8(-0.7, 2.3)      | 0.29 | 70  | 1.6(-1.9, 5.1)      | 0.37 | 73  | 0.8(-2.4, 4)        | 0.61 |
| Female               | 73  | 0.9(-0.6, 2.4)      | 0.22 | 72  | 0.6(-0.4, 1.6)      | 0.27 | 74  | -0.3(-2.1, 1.5)     | 0.74 |
| African American     | 73  | 1.1(-0.5, 2.7)      | 0.19 | 71  | 0.9(-1.5, 3.3)      | 0.45 | 74  | -0.1(-2.6, 2.3)     | 0.91 |
| Non African American | 68  | 0.6(-0.7, 2)        | 0.34 | 71  | 1.2(-1.5, 4)        | 0.37 | 73  | 0.7(-2, 3.4)        | 0.62 |
| BMI > 30             | 80  | 1.3(-0.3, 2.8)      | 0.12 | 80  | 1.7(-0.6, 4.1)      | 0.14 | 84  | 0.4(-2.3, 3.1)      | 0.76 |
| BMI 25-29.9          | 61  | 0.4(-0.9, 1.6)      | 0.59 | 62  | 0.2(-2.6, 3.1)      | 0.88 | 63  | 0.1(-2.3, 2.4)      | 0.97 |
| Met. Syndrome        | 27  | -0.2(-1, 0.7)       | 0.68 | 27  | -0.6(-1.7, 0.5)     | 0.28 | 31  | -0.4(-1.4, 0.5)     | 0.36 |
| No Met. Syndrome     | 114 | 1.1(-0.2, 2.4)      | 0.09 | 115 | 1.5(-0.7, 3.7)      | 0.19 | 116 | 0.4(-1.9, 2.7)      | 0.70 |

<sup>1</sup> CG = Higher Carbohydrate and Higher Glycemic Index

<sup>2</sup> Cg = Higher Carbohydrate and Lower Glycemic Index

<sup>3</sup> cG = Lower Carbohydrate and Higher Glycemic Index

<sup>4</sup> cg = Lower Carbohydrate and Lower Glycemic Index
